# Supplementary material
Source: PubMed Central journal article supplement (PMC6093816)
Supplement: NIHMS927122-supplement-1.pdf [file NIHMS927122-supplement-1.pdf]

## Supplementary Materials and Methods

### hiPSC culturing

The hiPSC lines 47-02 control and 47-01 patient were derived from fibroblasts using episomal reprogramming vectors: OCT3/4/shp53 (Addgene #27077), SOX2/KLF4 (Addgene #27078), 1-MYC/LIN28 vector (Addgene #27080) as previously described in (Schlaeger, et al, 2015). Briefly, the fibroblasts were transfected with Amaxa NHDF nucleofector kit (Lonza #VPD-1001) with Amaxa Nucleofector 2b (Lonza #AAB-1001) and using the Amaxa Nucleofection system (program P-022) to deliver episomal vectors into the cells. After transfection the cells were cultured for 10-14 days on adherent cultures on mouse embryonic fibroblasts (MEFs, Global Stem Inc.) in hESC-media: DMEM/F12+glutamax (Life Technologies), knock-out serum replacement (Gibco, Life Technologies),  $\beta$ -mercaptoethanol, MEM-NEAA (Life Technologies), supplemented with bFGF 8ng/ml (Invitrogen). After the hiPSC-colonies started to form on top of MEFs the colonies were picked manually and plated on Geltrex-coated plates (Gibco by Life Technologies) and cultured with mTESR1 medium (Stem Cell Technologies).

78 control, 77-patient and 77-TSC2-null lines were derived from lymphoblasts using the sendai-virus method for delivering OCT3/4, KLF4, L-MYC, SOX2, LIN28, -vectors into the cells. CRA401-patient, female control and male control were derived from fibroblasts using the sendai-virus method, as previously described (Schlaeger, et al, 2015).

After picking of the clones from transfected plates all the hiPSC colonies were cultured in feeder-free culture conditions on top of Geltrex (Gibco by Life Technologies) in mTESR1 medium (Stem Cell Technologies). The hiPSC colonies were passaged every 4-6 days, and media was changed every day. All studied hiPSC-lines had normal karyotype, and cells were tested routinely to be mycoplasma-negative. The cells were analyzed with qRT-PCR and westernblot-method to confirm pluripotency of the hiPSCs, and expression of pluripotency markers OCT4, NANOG, SSEA-4 and TRA1-60 were detected with immunocytochemistry (Supplementary Figure S1).

### PC differentiation of hiPSCs

Briefly, to induce the neural differentiation, hiPSC colonies were dissociated into single cells using Versene dissociation reagent for 10 minutes at 37 °C (Life Technologies). Single cells were plated into low-attachment dishes (CLS3471, Corning, Sigma) to form aggregates in neural induction medium: DMEM/F12 (Life Technologies), N2 1x (Life Technologies), B27 1x (Life Technologies), nicotinamide 10 mM (Sigma), noggin 50 ng/ml (Peprotech Inc.), SB-431542 10  $\mu$ M (Stemgent), Y-27632 10  $\mu$ M (dihydrochloride) (STEMCELL Technologies), CHIR99021 1.7  $\mu$ M (Stemgent). At day 2 of differentiation noggin concentration was increased to 100 ng/ml. At day 4 of differentiation FGF8b 100 ng/ml (Peprotech Inc.) was added to the media, together with bFGF 10 ng/ml at day 10-12, and nicotinamide was removed at day 4. Cells were plated into PDL (50  $\mu$ g/ml) and laminin (10  $\mu$ g/ml) coated plates at day 8, Y-27632 (dihydrochloride) 10  $\mu$ M was added to increase cell survival. At day 12 media was changed to Neurobasal (Life Technologies), B27 1x, N2 1x (Life Technologies), BDNF 10 ng/ml (Peprotech Inc.), T3 30  $\mu$ M (Sigma). Cells were cultured in this media until THY1-selection at day 28-32 of differentiation.

Differentiation was repeated for each cell line 3-5 times. The data from the TALEN-engineered bi-allelic TSC2-mutant (77-TSC2-null) hiPSC-line was analyzed from three biological samples collected from 3 separate differentiation times. Cell lines analyzed; 78 control ( $TSC2^{+/+}$ ), 77-patient ( $TSC2^{+/-}$ ), 77-TSC2-null ( $TSC2^{-/-}$ ), CRISPR-corrected 77-control line ( $TSC2^{+/+}$ ), 47-02 control ( $TSC2^{+/+}$ ), 47-01 patient ( $TSC2^{+/-}$ ), F628 control ( $TSC2^{+/+}$ ), Male control ( $TSC2^{+/+}$ ), CRA401 patient ( $TSC2^{+/-}$ ), (see Supplementary Table 1).

### THY1 immunopanning for Purkinje cell precursor selection

The non-tissue culture-treated petri-dishes were coated with goat anti-mouse IgG (Cappel) 20  $\mu$ g/ml in 50 mM Tris-HCl pH 9.5, overnight +4 °C. Plates were washed with PBS and the anti-human THY1

antibody 2.6 µg/ml (Biolegend) was diluted in 0.2 % BSA-DMEM/F12 and incubated for 30 minutes at 37 °C. The adherently cultured iPSC-derived cerebellar neurons were dissociated with Accutase (Innovative Cell Technologies) for 15 minutes at 37 °C, and single cells were added to THY1-coated dishes in DMEM/F12, glucose 25 mM (Sigma), Y-27632 10 µM and incubated for 30 minutes in 37 °C. Cells were de-attached from immunopanning plates with Accutase treatment for 10 minutes at 37 °C and plated on low-attachment plates to aggregate into spheres in Neurobasal (Life Technologies), B27 1x (Life Technologies), N2 1x (Life Technologies), CHIR 1.7 µM, FGF8b 100 ng/ml, bFGF 10 ng/ml, BDNF 10 ng/ml (Peprotech Inc.), T3 30 µM (Sigma), BSA 1 % media for 2 to 7 days *in vitro*. All hiPSC lines presented in Supplementary Table 1 were differentiated into PCs and underwent Thy1+ immunopanning using this method.

### **Co-culture of human Purkinje cells with mouse granular cell culture**

Mouse granular neurons were isolated from P5-7 pups' cerebellum. Cerebellum was dissociated in MEM-medium with Pen/strep (P/S, Life Technologies) solution supplemented with Glucose 25 mM (Sigma), DNase 12 U/ml and papain 40 U/ml (Worthington, Biochemical Corporation) solution for 10 minutes at 37 °C. Enzymatic dissociation reaction was inactivated with 10 % FBS-HBSS-Glucose 25 mM-P/S solution, and cells were further dissociated into single cells using mechanical titration in MEM-base medium with P/S (Life Technologies) solution with Glucose 25 mM (Sigma) and DNase 12 U/ml. Cells were washed once with 10 % FBS-HBSS-Glucose-P/S solution. Single cells were filtered through cell-strainer 45 µm and plated into Poly-d-lysine 50 µg/ml and laminin 10 µg/ml coated sterile glass-coverslips into co-culture medium: Neurobasal-A (Life Technologies), N2 1x (Life Technologies), B27 1x (Life Technologies), BSA 1 % (Sigma), BDNF 10ng/ml (Peprotech Inc.), T3 30 µM (Sigma), laminin 1 µg/ml (Sigma). AraC 4 µM was added to the cell cultures to inhibit astrocyte proliferation and growth during the first two-weeks of differentiation. Human THY1<sup>+</sup> spheres were treated with Y-27632 (10 µM) for 30 minutes, prior to mechanical dissociation into smaller clusters and plating on top of mouse granular cells. bFGF 5 ng/ml and Y-27632 were maintained in the medium for two days after plating to inhibit cell death. bFGF was maintained in medium for an additional two weeks to enhance mouse GC survival. All hiPSC lines presented in Supplementary Table 1 were differentiated into PCs and THY1+ immunopanned and co-cultured with mouse GCs.

### **Protein expression analyzes**

Protein samples were collected into RIPA-buffer supplemented with PMSF 2mM, protease inhibitor cocktail and sodium orthovanadate 1 µM (Santa Cruz). Protein concentration was analyzed using the Bradford Assay (Biorad) and 96-well plate reader (A595 nm) and 15 µg/protein was loaded/well. 4–20% Criterion™ TGX™ gel (Biorad) was blotted into Immobilon-Transfer membrane (EMD Millipore) with Turbo-Transfer buffer (Biorad) using the Trans-blot Turbo Transfer System (Biorad). The list of antibodies used is presented in Supplemental Table 3. In the main Figure 2 and FigS1 the protein expression data was analyzed and presented from three differentiation replicates of; 78 control (*TSC2*<sup>+/+</sup>), 77-patient (*TSC2*<sup>+/-</sup>) and 77-TSC2-null (*TSC2*<sup>-/-</sup>). In the Supplementary Figures S5 and S9 the protein expression data was analyzed from three independent control lines: 47-02, 78, F628 (*TSC2*<sup>+/+</sup>), three patient lines 47-01, 77, CRA401-patient (*TSC2*<sup>+/-</sup>), and three biological replicates of 77-TSC2-null (*TSC2*<sup>-/-</sup>). In Figure 5, the protein expression data was analyzed and presented from three differentiation replicates of 78 control (*TSC2*<sup>+/+</sup>), 77-patient (*TSC2*<sup>+/-</sup>), 77-TSC2-null (*TSC2*<sup>-/-</sup>), F628 control (*TSC2*<sup>+/+</sup>), Male control (*TSC2*<sup>+/+</sup>), CRA401-patient (*TSC2*<sup>+/-</sup>), 47-02 control (*TSC2*<sup>+/+</sup>), and 47-01-patient (*TSC2*<sup>+/-</sup>) cell lines.

### **ImageJ analyzes**

Cells were analyzed at day 16 and 24 of differentiation for Ki67-positive cell and SKOR2-positive cell calculations. Average number of positive cells was counted from 6-8 randomly selected areas/coverlip. Approximately 7,000 -12,000 cells were counted from each treatment condition. The

Ki67 (day 16 and 24) and SKOR2 (day 24) was analyzed and presented from three differentiation replicates of each cell line; 78 control ( $TSC2^{+/+}$ ), 77-patient ( $TSC2^{+/-}$ ) and 77-TSC2-null ( $TSC2^{-/-}$ ) (Figure 2), 47-02 control ( $TSC2^{+/+}$ ), 47-01 patient ( $TSC2^{+/-}$ ), F628 control ( $TSC2^{+/+}$ ), CRA401 patient ( $TSC2^{+/-}$ ), (Supplementary Figure S4), and three technical replicates of CRISPR-corrected isogenic control cell line (Supplementary Figure S2).

For soma size analyses ImageJ software was used for average area measurement of the calbindin positive Purkinje cells at day 125 of differentiation. Co-staining with huNuc was used to identify human cells in co-cultures with mouse granular cells (Figure 3).

Neurite number was analyzed with ImageJ software from calbindin/huNuc positive Purkinje cells. 20 images/condition were analyzed from each differentiation patch (Figure 3).

ImageJ software was used to analyze mean grey intensity value in selected area (integrated density) of pS6 staining at day 125 of Purkinje cell differentiation in co-culture with mouse granular neurons, using maximum intensity projections of z-stacks of confocal images 63x/1.40 Oil DIC M27, Frame size 2048x2048 (Carl Zeiss LSM700, German), human cells were identified with huNuc. 15-20 images/condition were analyzed from each differentiation patch. Cell lines analyzed; 78 control ( $TSC2^{+/+}$ ), 77-patient ( $TSC2^{+/-}$ ), 77-TSC2-null ( $TSC2^{-/-}$ ), 47-02 control ( $TSC2^{+/+}$ ), 47-01 patient ( $TSC2^{+/-}$ ), F628 control ( $TSC2^{+/+}$ ), Male control ( $TSC2^{+/+}$ ), CRA401 patient ( $TSC2^{+/-}$ ), (Figure 3) and isogenic control line CRISPR-corrected 77 ( $TSC2^{+/+}$ ), 77-patient ( $TSC2^{+/-}$ ), 77-TSC2-null ( $TSC2^{-/-}$ ) (Supplemental Figure S2).

For synaptic marker expression analyses of SYP1, PSD95 and GRID2, the hiPSC-PCs were co-stained with calbindin and the synaptic marker expression was analyzed from z-stacks of confocal images 63x/1.40 Oil DIC M27 Frame size 2048x2048 (Carl Zeiss LSM700, German). Synaptic marker expression was analyzed with ImageJ in calbindin positive dendrites. Cell lines analyzed: 78 control ( $TSC2^{+/+}$ ), 77-patient ( $TSC2^{+/-}$ ), 77-TSC2-null ( $TSC2^{-/-}$ ), 47-02 control ( $TSC2^{+/+}$ ), 47-01 patient ( $TSC2^{+/-}$ ) (Figure 3, Supplementary Figure S9). For Torin1 and vehicle treatment (DMSO) cell line 47-01 patient ( $TSC2^{+/-}$ ) was analyzed (Supplementary Figure S11).

## Immunocytochemistry

Cells were fixed with 4% paraformaldehyde for 20 minutes at room temperature. Prior to addition of primary antibodies the background was blocked with 5 % BSA-PBS-TritonX 0.1 % 1hour at room temperature. Primary antibodies were diluted into 1% BSA-PBS-Triton-X 0.1 % and incubated over night at 4°C (Supplementary Table 2). Secondary antibodies were diluted 1:400 into 1 % BSA-PBS-Triton-X 0.1 %, and incubated for 1-2 hours at room temperature in the dark, (Supplementary Table 2). The nuclear staining was done with Hoechst (Life Technologies) 4 µg/ml for 5 minutes. Coverslips were mounted with Aqua Poly/mount (Polysciences Inc.). Microscopy was done with Nikon Eclipse 80i microscope and iPlab software using Nikon Plan Apo 20x/0.75 magnification. Confocal microscope Imager M2/LSM700 (Carl Zeiss) was used with 63x oil objective and 25x oil objective, and zoom 1 or 0.5, picture capture was done with software ZEN2009 (Zeiss).

## Flow cytometry

For live cell staining the cells were dissociated from plates as single cells using Accutase for 20-30 minutes at 37°C. To inactivate the dissociation-reaction the cells were incubated with 2 % BSA-HBSS and centrifuged into a cell-pellet at 1000 rpm 3 min. Primary antibodies were added for the cells and incubated for 20 minutes at room temperature (Supplementary Table 2). After washes with 2 % BSA-HBSS-P/S the secondary antibodies were added to the cells and incubated for 20 min in the dark at room temperature. After the washes, cells were resuspended into 2 % BSA-HBSS and stored on ice until analyses.

For mitochondrial superoxide-analyses, MitoSOX-Red dye (Molecular Probes, Life Technologies, ThermoFisher) was used according to manufacturers' instructions. 24 hours before staining cells were treated with rotenone 500 nM to induce oxidative stress. Cell were washed with dPBS and incubated with MitoSOX for 30 minutes at 37°C. Cells were de-attached with Accutase for 20 minutes at 37°C. After washes with 2 % BSA-HBSS, the cells were incubated for 2 minutes with Sytox-green nucleic

acid stain (dead cell marker, Life Technologies, ThermoFisher) and analyzed with LSRII (BD Biosciences); 20,000 events/sample were recorded.

For intracellular marker staining the cells were washed with 1X dPBS and treated with 0.01 % Formalin for 10 minutes at room temperature, then 0.1 % Triton-X-100 was added to the cells to permeabilize the cell membrane and incubated for an additional 10 minutes at room temperature. Cells were washed with 2% BSA-HBSS-TritonX100-0.1 % and centrifuged for 1500g x 3minutes. Primary antibodies were added to the cells in 2 % BSA-HBSS, incubated for 30min room temperature, washed and secondary antibodies were added to the cells in 2 % BSA-HBSS, and incubated for 30 minutes at room temperature. After washes with 2 % BSA-HBSS, the cells were analyzed with LSRII (BD Biosciences); 20,000 events/sample were recorded. For determination of cell population of interest, gating parameters of SSC/FSC voltages were determined with micro-beads (7.5  $\mu\text{m}$  and 1.3  $\mu\text{m}$ ), and cells  $\geq 7.5 \mu\text{m}$  were included inside of the gate. All hiPSC lines presented in Supplemental Table 1 were characterized with flow cytometry. Data presented in Figure 2 was pooled from biological replicates (n=2-3/line) of three control lines ( $TSC2^{+/+}$ ) and three patient lines ( $TSC2^{+/-}$ ), and three biological replicates of the TSC2-null line ( $TSC2^{-/-}$ ). In the Supplementary Figure S6 A-F the representative blots are from 78-control ( $TSC2^{+/+}$ ), 77-patient ( $TSC2^{+/-}$ ), and 77-TSC2-null ( $TSC2^{-/-}$ ). In the Supplementary Figure S6 G-L the PCP2 expression-plots are presented from cell lines; 78 control ( $TSC2^{+/+}$ ), 77-patient ( $TSC2^{+/-}$ ), 77-TSC2-null ( $TSC2^{-/-}$ ), 47-02 control ( $TSC2^{+/+}$ ), 47-01 patient ( $TSC2^{+/-}$ ), CRA401 patient ( $TSC2^{+/-}$ ).

### Cell sorting

For the KIRREL2<sup>+</sup> sorting the iPSC-derived cerebellar precursors were detached from plates with Accutase treatment for 20 minutes at 37 °C. For the THY1<sup>+</sup> sorting the post-mitotic PCs were also detached from plates with Accutase treatment. The enzymatic reaction was inactivated with 2 % BSA-HBSS and primary antibody against KIRREL2 1:50 (Nephrin 3, goat IgG, Santa Cruz) or THY1 1:100 (mouse IgG, Biolegend) was added to the cells in 2 % BSA-HBSS-P/S. Cells were incubated 20 min on ice after which they were washed with 2 % BSA-HBSS-P/S and secondary antibody anti-goat Alexa-488 (Life Tech.) 1:160 or anti-mouse Alexa-488 (Life Tech.) 1:200 was added for the cells and incubated 20 minutes on ice.

Cells were sorted with FACS-Aria II (BD Bioscience) using 100  $\mu\text{m}$  nozzle and low sheath pressure PSI 20. Sorted cells were collected into Neurobasal-medium supplemented with B27, 1% BSA, and P/S. KIRREL2<sup>+</sup> sphere formation was done in low-attachment plates in Neurobasal-medium with B27, P/S, ROCK-inhibitor 10  $\mu\text{M}$ , FGF8b 100 ng/ml, and CHIR 1.7  $\mu\text{M}$ .

For RNA collection, the sorted THY1<sup>+</sup> cells were centrifuged 2500 rpm for 3 min and washed with dPBS and suspended into RLT-Plus buffer (Qiagen), RNA was isolated with RNeasy Mini-Plus kit (Qiagen).

### Electrophysiology

Whole-cell current-clamp and voltage-clamp recordings were obtained using a Multiclamp 200 A (Molecular Devices) amplifier at room temperature (25 °C). Data were sampled at 20 kHz, digitized with a Digidata 1440A A/D interface and recorded using pCLAMP 10 software (Molecular Devices). Data was low-pass filtered at 2 kHz. Patch pipettes were pulled from borosilicate glass capillaries on a Sutter Instruments P-97 puller and had resistances of 3–5 M $\Omega$ . Series resistance was typically 5–15 M $\Omega$  and compensated by ~80 %. Resting membrane potential and spontaneous firing rate were first measured in current clamp mode by recording and averaging for 60 s in gap-free mode, and afterwards a small holding current was used to clamp the resting membrane potential of each cell as close as possible to -70 mV. Action potential threshold was measured by applying 20 ms steps in increments of 5 pA until an action potential was generated. Membrane potentials were corrected for the liquid junction potential. Rheobase was measured by applying 500ms steps in increments of 5 pA until an action potential was generated. Excitability curves (firing rate vs amplitude of current injection) were constructed using data from the rheobase protocol. Only spikes with an amplitude >20 mV were counted. The external solution consisted of (mM): 125 NaCl, 26 NaHCO<sub>3</sub>, 1.25 NaH<sub>2</sub>PO<sub>4</sub>,



2.5 KCl, 1 MgCl<sub>2</sub>, 2 CaCl<sub>2</sub>, and 25 glucose (pH 7.3, osmolarity 310) equilibrated with 95% O<sub>2</sub> and 5% CO<sub>2</sub>. The internal solution contained (in mM): 150 K-gluconate, 3 KCl, 10 HEPES, 0.5 EGTA, 3 MgATP, 0.5 GTP, 5 phosphocreatine-tris<sub>2</sub>, and 5 phosphocreatine-Na<sub>2</sub>. pH was adjusted to 7.2 with NaOH. Current-clamp intrinsic excitability recordings were performed in CNQX (10 μM), AP-5 (10 μM), bicuculline (30 μM) and strychnine (10 μM) to block AMPA receptors, NMDA receptors, GABA<sub>A</sub> and glycine receptors respectively. Spontaneous IPSCs were recorded at 0 mV and could be blocked by a 3 minute perfusion of 30 μM bicuculline. Spontaneous EPSCs were recorded at -70 mV and could be blocked by a 3 minute perfusion of 10 μM CNQX. Miniature EPSCs were recorded at -70 mV in the presence of 1 μM TTX and 30 μM bicuculline. Action potentials and miniEPSCs were detected and analyzed using Clampex 10 software (Molecular Devices). All chemicals were purchased from Sigma-Aldrich or Tocris. Purkinje cells were identified by their distinctive morphology – large cells with many neurites (Supplementary Figure S10). Where possible, multiple differentiations of PCs (n=2-4) from the same control and patient lines were recorded at the same age in culture, the data was pooled and analyzed (see the n-values for the cell numbers/line in the supplemental Table 4). Rapamycin treated (20 nM rapamycin for two weeks prior to recording) and vehicle (DMSO) treated control and patient derived PCs from concurrent rounds of differentiation were compared for all cell lines. hiPSC-derived PCs were analyzed from the following lines: 78 control (*TSC2*<sup>+/+</sup>), 77-patient (*TSC2*<sup>+/-</sup>), 77-TSC2-null (*TSC2*<sup>-/-</sup>), 47-02 control (*TSC2*<sup>+/+</sup>), 47-01 patient (*TSC2*<sup>+/-</sup>), F628 control (*TSC2*<sup>+/+</sup>), CRA401 patient (*TSC2*<sup>+/-</sup>).

### Transcriptional gene expression profiling

HiPSC-derived THY1<sup>+</sup> selected cells were harvested for RNA extraction after 40 days of differentiation. 500ng of purified total RNA were used for library preparation following the manufacturer's protocol (Illumina TruSeq Stranded mRNA sample preparation kit). The finished dsDNA libraries were quantified by Qubit fluorometer, Agilent TapeStation 2200, and RT-qPCR using the Kapa Biosystems library quantification kit. Sequencing was done on an Illumina NextSeq500 run with single-end 75bp reads at the Dana-Farber Cancer Institute Molecular Biology Core Facilities (Boston). hiPSC-derived THY1<sup>+</sup> PCs were analyzed from three independent biological replicates per each cell line: 78 control (*TSC2*<sup>+/+</sup>), 77-patient (*TSC2*<sup>+/-</sup>), 77-TSC2-null (*TSC2*<sup>-/-</sup>), 47-02 control (*TSC2*<sup>+/+</sup>), 47-01 patient (*TSC2*<sup>+/-</sup>).

Reads were inspected with fastQC, and no sample was found to be technically poor. Reads were then mapped with Hisat2. We used the pre-built HG38 genome build with transcript annotations from Ensembl. Mapping was performed with default options and with the --dta option. We found that each sample had about 70% reads that uniquely mapped to the genome, 20% that mapped in more than one location, and 10% that did not map. We then used Stringtie to annotate transcripts, and we used the Ensembl transcripts as a reference. All GTF files from each sample were consolidated using Stringtie with the --merge option. Finally, Stringtie was run again on the merged GTF file to estimate transcript abundances. The data was loaded into R using the Ballgown package. Gene expression and transcript expression were obtained from Ballgown. We annotated transcripts by comparing each transcript identified in our dataset to Refseq genes obtained from UCSC Genome Browser. Because some transcripts identified in the RNA sequencing did not map to known Refseq genes, we provided a BED file that contains genomic locations for all transcripts identified. The name position of the BED file contains the "Gene Name" assigned by Stringtie and the unique transcript ID.

We performed differential expression for each patient (*TSC2*<sup>+/-</sup>) or TSC2-null (*TSC2*<sup>-/-</sup>) sample by comparing it to a family control (*TSC2*<sup>+/+</sup>). We extracted count data using the prepDE.py script for each sample. These data were used to perform differential expression analysis using DESeq2. We used a false discovery rate of <0.01 as a threshold for significant differential expression.

Due to the fact that some of our controls were not the same gender as the related patient, we decided to evaluate for and eliminate gene expression differences that could have been caused by comparing across gender alone. First, we obtained microarray data from four different cell lines collected from healthy controls from a separate study of human iPSC derived neurons (Brennand et al., 2011), and

we compared gene expression between the lines obtained from male and female donors using LIMMA. We identified 384 genes that were significantly differentially expressed (FDR < 0.01), and we then compared this group of genes to the patient vs control comparisons that we had performed previously and subtracted out any overlapping genes from our analyses.

We performed Weighted Gene Co-expression Network Analysis using the WGCNA package in R. We obtained transcript level expression data for all transcripts using Ballgown. We then identified transcripts with a median expression in the 70<sup>th</sup> percentile or greater in the control, patient, or *TSC2*-null cell lines, which lead to the identification of 76,447 transcripts. We then calculated the variance of each of these genes, and we used the top 10,000 genes for construction of the network. We calculated the adjacency matrix for these genes with a beta=6, and this adjacency matrix was used to calculate the topological overlap matrix. Hierarchical clustering of the topological overlap matrix using the “average” algorithm was performed, and modules were identified using dynamic tree cutting. The first principal component was calculated using the moduleEigengenes function.

### Gene ontology analyses

We used DAVID (<https://david.ncifcrf.gov/>) to perform gene ontology analysis. Refseq identifiers corresponding to transcripts in either the M67 or M99 module were used as input into DAVID. The categories of biological process, cellular compartment, and molecular function were analyzed in both the GO\_FAT and GO\_DIRECT databases. Gene ontology categories were selected based on specificity and non-redundancy. We compared the differential expression analysis and co-expression analysis to other datasets. Genes in the Grabole et al. (2016) dataset were selected if their adjusted p-value was <0.05 in the homozygous mutant (*TSC2*<sup>-/-</sup>) versus control (*TSC2*<sup>+/+</sup>) comparison. The Ascano et al. (2012) dataset was used to identify FMRP targets, and we chose all genes with one or more FMRP binding site. Comparisons were between the differential expression analysis and co-expression modules were performed by calculating the overlap of associated gene symbols in each list, and the p-value was calculated by the hypergeometric probability.

### Quantitative RT-PCR

RNA was isolated from undifferentiated hiPSCs at day 0 of differentiation. During differentiation RNA samples were collected at days 10, 16, 24, 32 and 48 and compared to day 0 (Fold change =1, data is presented in Figure 1, Supplementary Figure 5). HiPSC-derived NPC-samples were collected at day 32 of differentiation (Supplemental Figure 3). RNA was also isolated from THY1<sup>+</sup> selected hiPSC-derived developing Purkinje cells after 40 days of differentiation (data is presented in Figure 5).

RNA purification was done using RNeasy Mini Plus-kit (Qiagen). cDNA was prepared using Superscript RT-kit (Applied Biosystems), 150 ng of RNA was used for each sample. qRT-PCR was performed with SYBR-Green master mix (Life Technologies), supplemented with forward and reverse primers (IDT Primers) and MilliQ-water, cDNA (1:4 dilution in MilliQ-water). The primers were designed with Primer3 software and the size of the product was optimized to be 90-115 bp. Primers were blasted (BLAST) to confirm specificity to desired gene target. Samples for THY1<sup>+</sup> qRT-PCR were collected from cell lines: 78 control (*TSC2*<sup>+/+</sup>), 77-patient (*TSC2*<sup>+/-</sup>), 77-TSC2-null (*TSC2*<sup>-/-</sup>), 47-02 control (*TSC2*<sup>+/+</sup>), 47-01 patient (*TSC2*<sup>+/-</sup>). HiPSC-derived THY1<sup>+</sup> PCs were treated with vehicle (DMSO) or rapamycin (20nM) prior to THY1<sup>+</sup> selection and RNA collection (Figure 5F).

### CRISPR-cas-9 method

CRISPR-cas9 correction for the *TSC2*-patient hiPSC-line was done following adapted protocols (Horii et al 2013, Hou et al, 2013), for correction of the microdeletion of the *TSC2*-allele in the hiPSC-line 77-patient (*TSC2*<sup>+/-</sup>). CRISPR sgRNA-guide sequence was designed based on the *TSC2*-deletion site (Supplementary Figure 2) and cloned into plasmid PX459v2 (Addgene). CRISPR-

plasmid were prepared using an endo-free midi prep (Qiagen). Prior nucleofection hiPSCs were pre-treated with ROCK-inhibitor for at least 2 hours. Cell were transfected with AMAXA nucleofector 4D primary cell P3 kit. 2 µg of CRISPR-cas9 plasmid and 3 µl of 100 mM ssODN were added to the solution to the cell pellet, nucleofection was done with program CB-150 (Amaza). Cells were plated on DR4 MEFs in hESC-medium+ROCK-inhibitor on a 10 cm plate. After 24 hours cells were re-fed with hESC-medium+0.5 µg/µl of puromycin. After 48 hours of puromycin-selection the cells were cultured with hESC-media+ROCK-inhibitor (for 3-5 days). About 14 days post nucleofection colonies were isolated manually and transferred into 24 well plates. 3-4 days after colony isolation a few of the newly formed colonies were collected from each well in a PCR tube. The cells were lysed using a HOTSHOT method and PCR performed on each clone. PCR product were digested with restriction enzyme and analyzed by gel-electrophoresis. PCR product were further analyzed by Sanger-sequencing and expanded. Total of 5 hiPSC-clones with corrected *TSC2*-allele were generated.

## Supplemental Figures

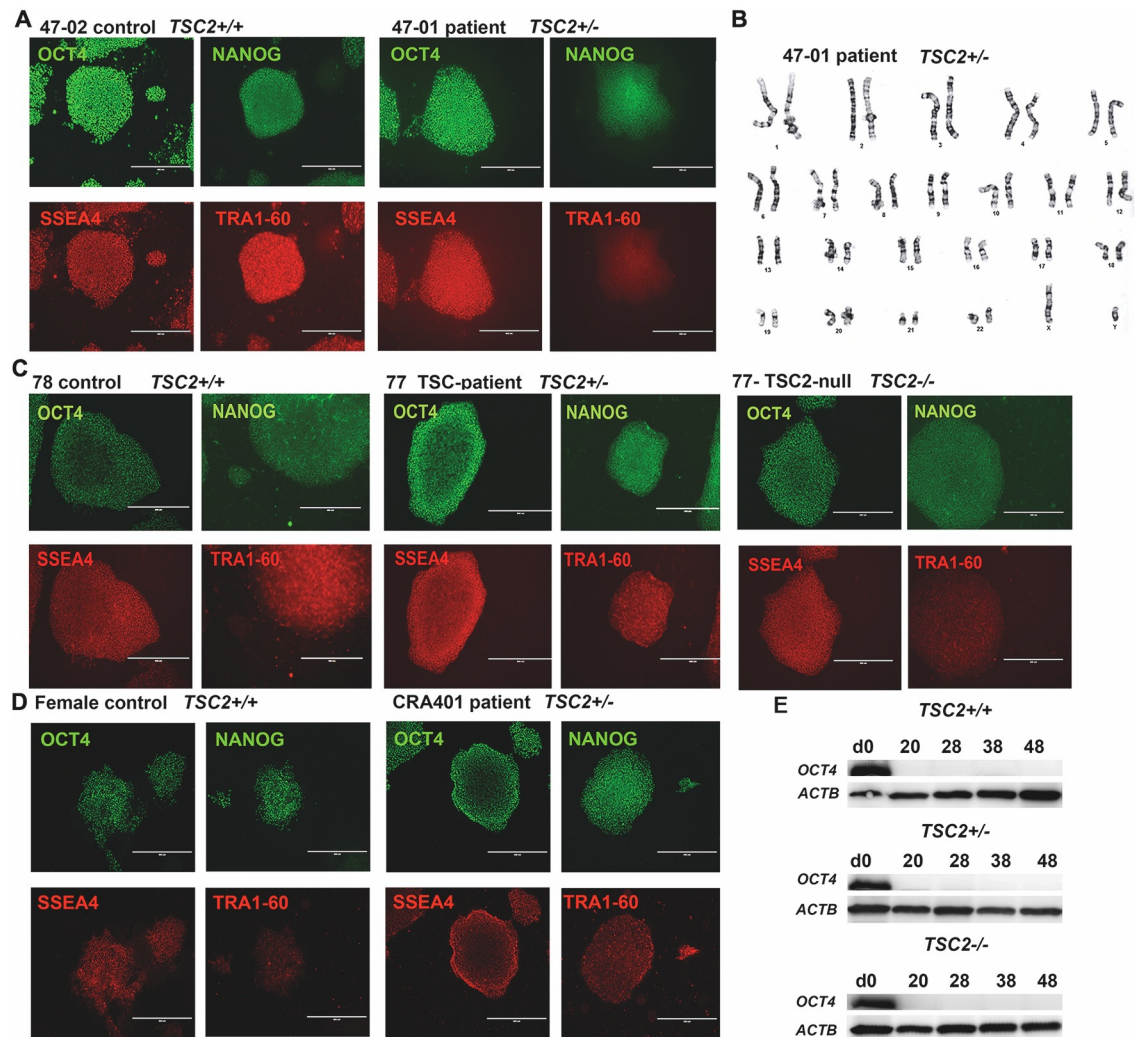

**Supplementary Figure 1. Pluripotency marker expression in hiPSCs.** **A.** hiPSC colonies of 47-02 control and 47-01 TSC-patient express OCT4, NANOG, SSEA4, and TRA1-60. Scale bar 400  $\mu$ m. **B.** Representative image of karyotype characterization of patient cell line 47-01. **C.** Pluripotency marker expression analyses in 78-control, 77 patient, and 77-TSC2-null hiPSCs show that stem cell colonies were positive for OCT4, NANOG, SSEA4, and TRA1-60. **D.** Pluripotency marker expression analyses in gender-matched female hiPSC control (F628), and TSC-patient (CRA401) hiPSCs show that stem cell colonies are positive for OCT4, NANOG, SSEA4, and TRA1-60. Scale bar 400  $\mu$ m. **E.** Protein expression analyses showed OCT4 expression in hiPSCs at day 0 of differentiation after which its expression became absent in differentiating neural cells at days 20-48. (78 control *TSC2*<sup>+/+</sup>, 77patient *TSC2*<sup>+/-</sup> and 77-TSC2-null *TSC2*<sup>-/-</sup>).



expression of KIRREL2-positive cells compared to isogenic control cells, scale bar 25  $\mu\text{m}$ . **I.** Quantification of SKOR2+ cells from total cell population showed decreased SKOR2+ cell number in TSC2-deficient cell populations ( $TSC2^{+/-}$ ,  $TSC2^{-/-}$ ) compared to isogenic-control cells ( $TSC2^{+/+}$ ). Rapamycin treatment (20nM, for 2 weeks) rescued the differentiation deficit of TSC2-deficient cells. **J.** Immunocytochemical staining of pS6 expression in isogenic control ( $TSC2^{+/+}$ ) and TSC2-mutant THY1+ hiPSC-derived PC precursor cells ( $TSC2^{+/-}$  and  $TSC2^{-/-}$ ), scale bar 15  $\mu\text{m}$ . **K.** Quantification of pS6 mean intensity density revealed significantly increased pS6-expression in TSC2-deficient THY1+ selected hiPSC-PC precursors compared to isogenic control cells and rapamycin treatment for two weeks during the differentiation process decreased pS6-expression in the cells. Statistical analyses were performed using two-way ANOVA followed by post-hoc-test of selected pairs. Data are presented as mean  $\pm$  SEM. **L.** THY1+ hiPSC-PCs at day 49 of differentiation were characterized for the synaptic marker expression with western blot method. Increased expression of FMRP, GRID2, PSD95, and SYP1 were detected in CRISPR-cas9 corrected 77 isogenic control cells ( $TSC2^{+/+}$ ) compared to TSC2-deficient 77-patient ( $TSC2^{+/-}$ ) and 77-TSC2-null ( $TSC2^{-/-}$ ) hiPSC-PCs. **M.** Representative CALB1-positive hiPSC-derived PC-precursors at day 50 of differentiation, isogenic CRISPR-cas9 corrected cell ( $TSC2^{+/+}$ ), 77-patient hiPSC derived-cell ( $TSC2^{+/-}$ ), 77-TSC2-null hiPSC-derived cell ( $TSC2^{-/-}$ ), scale bar 8  $\mu\text{m}$ .





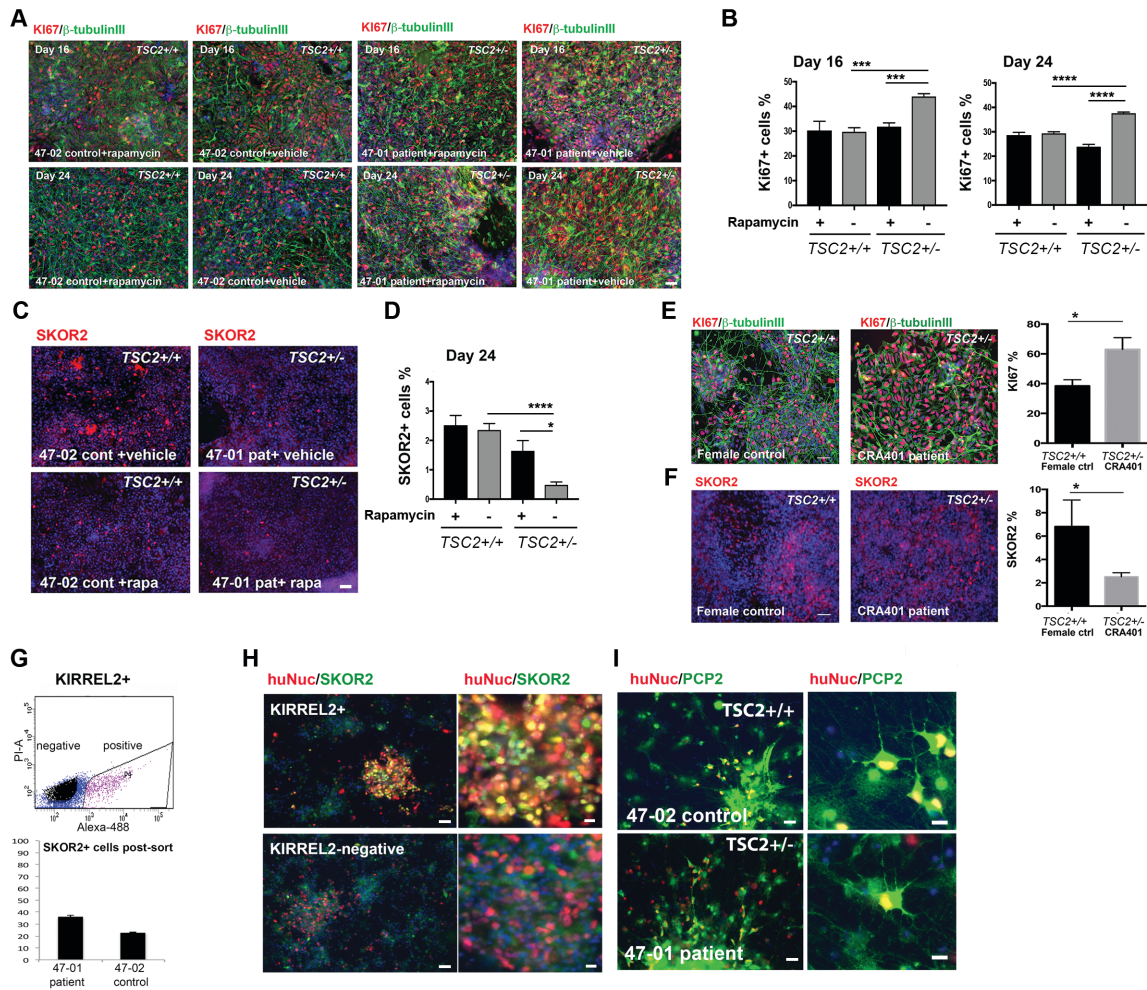

**Supplementary Figure 4. Characterization of TSC2-deficient hiPSC-derived NPCs.** **A.** Representative images with Ki67 staining at day 16 and 24 of differentiation of 47-02 control cells (*TSC2*<sup>+/+</sup>) and 47-01 TSC-patient cells (*TSC2*<sup>+/-</sup>). Cells were treated for 1 week (upper lane) or for 2 weeks (second lane) with vehicle (DMSO) or rapamycin (20 nM). Scale bar 32 μm. **B.** Quantification of the Ki67<sup>+</sup> cells at day 16, and day 24. Proliferation capacity of TSC2-deficient patient cells 47-01 was significantly increased compared to control 47-02 cells, at day 16 and day 24 of differentiation. Rapamycin treatment decreased the proliferation rate of *TSC2*<sup>+/-</sup> patient cells at day 16 and 24. **C-D.** Quantification of SKOR2<sup>+</sup> cells at day 24 of differentiation from 47-02 control cell population and 47-01 TSC-patient cell population. SKOR2 PC-precursor marker expression was significantly decreased in TSC2-deficient patient cell population 47-01 compared to control cells 47-02. Rapamycin treatment restored the SKOR2 expression to similar levels to that of control cells. Scale bar 32 μm. Statistical analyses (B and D) were performed using two-way ANOVA followed by post-hoc-test of selected pairs, \*\*\*\*p<0.0001, \*\*\*p<0.001, \*p<0.05. **E.** Representative images of Ki67 at day 16 and **F)** SKOR2 expression at day 24 in control F628 (*TSC2*<sup>+/+</sup>) and TSC-patient CRA401 (*TSC2*<sup>+/-</sup>) hiPSC-derived NPC cultures. Scale bar 32 μm. CRA401 (*TSC2*<sup>+/-</sup>) patient NPCs expressed significantly increased Ki67<sup>+</sup> cells, and significantly reduced amounts of a cerebellar precursor marker SKOR2, compared to control cells F628 (*TSC2*<sup>+/+</sup>). Hoechst was used for nuclear staining (blue). Data are presented as mean ± SEM, t-test \*p<0.05 (**E-F**). **G.** Gating strategy for KIRREL2 sorting shows selection of KIRREL2<sup>+</sup> stained cells (purple) and KIRREL2-negative cell population (black). KIRREL2<sup>+</sup> sorting increased the SKOR2-positive cell number in patient 47-01 and control 47-02 cell populations. After sorting, 35 % of the total cell population were SKOR2<sup>+</sup> in 47-01 patient cell population and 22 % were SKOR2<sup>+</sup> in 47-02 control cell population. **H.** Representative images of KIRREL2<sup>+</sup> sorted cells show differentiation of the cells into SKOR2<sup>+</sup> cells after 2 weeks of co-culturing with mouse granular neurons. Scale bar 64 μm. Higher magnification shows co-localization



of SKOR2 in huNuc -positive cells. Scale bar 10  $\mu\text{m}$ . KIRREL2-negative sorted cells didn't express SKOR2 in huNuc-positive cells. Scale bar 64  $\mu\text{m}$ . **I.** KIRREL2<sup>+</sup> sorted cells differentiated into PCP2-positive/huNuc-positive PC precursors after 35 days of sorting in co-cultures with mouse granular neurons. Scale bar 60  $\mu\text{m}$ . Higher magnification shows co-localization of huNuc in PCP2 positive cells, scale bar 20  $\mu\text{m}$ . Hoechst was used for nuclear staining (blue). Data are presented as mean  $\pm$  SEM.

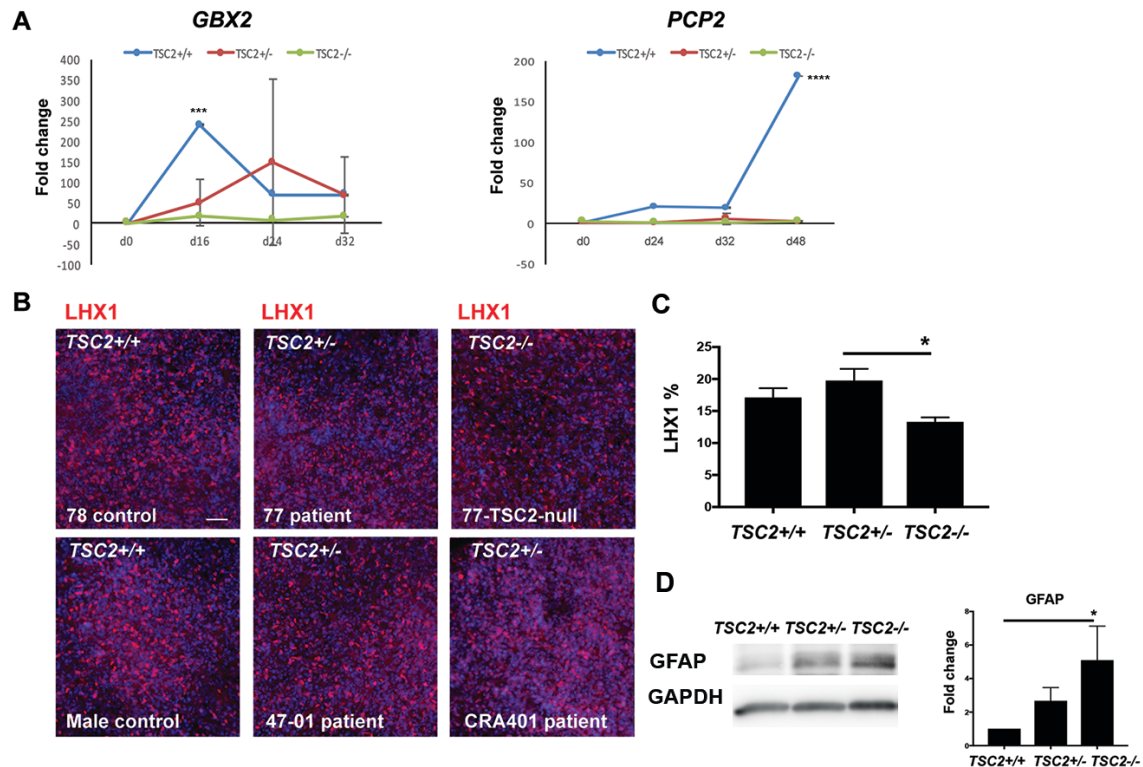

**Supplementary Figure 5. Differentiation capacity of TSC2-deficient hiPSC-derived NPCs into PCs.** **A.** Time point mRNA expression analyses of cerebellar lineage marker *GBX2* during days 0-32 of cerebellar cell induction, and Purkinje cell specific marker *PCP2* expression during days 24-48 of differentiation. *TSC2* deficient hiPSCs (*TSC2*<sup>+/-</sup>, *TSC2*<sup>-/-</sup>) show delayed and reduced expression of *GBX2* at days 0-16, (\*\*\*)  $p < 0.001$  at day 16 between *TSC2*<sup>+/+</sup> and *TSC2*<sup>+/-</sup>, (\*\*\*)  $p < 0.001$  at day 16 between *TSC2*<sup>+/+</sup> and *TSC2*<sup>-/-</sup> and downregulated expression of *PCP2* compared to control hiPSC derived cell populations days 24-48 (\*\*\*\*  $p < 0.0001$  at day 48 between *TSC2*<sup>+/+</sup> and *TSC2*<sup>+/-</sup>, \*\*\*\*  $p < 0.0001$  at day 48 between *TSC2*<sup>+/+</sup> and *TSC2*<sup>-/-</sup>). **B.** Representative images of LHX1 expression in hiPSC-derived NPCs, control cell lines: 78 and male control (*TSC2*<sup>+/+</sup>), TSC-patients: 77, 47-01 and CRA401 (*TSC2*<sup>+/-</sup>), and 77-TSC2-null (*TSC2*<sup>-/-</sup>) at day 24. Scale bar 32  $\mu\text{m}$ . **C.** Quantification of the LHX1<sup>+</sup> cells from the total cell population showed >15% LHX1 expression in control cells, >19% in patient cells and >13% in TSC2-null cells (one-way ANOVA, post-hoc-test, \* $p < 0.05$ ). **D.** GFAP expression in hiPSC-derived NPC cultures, representative blots of 78 control (*TSC2*<sup>+/+</sup>), 77patient (*TSC2*<sup>+/-</sup>) and 77-TSC2-null (*TSC2*<sup>-/-</sup>). *TSC2*-deficient cells had increased GFAP expression compared to control cells, one-way ANOVA, post-hoc-test (\* $p < 0.05$ ). GFAP expression was analyzed between days 30-36 of differentiation, WB-quantification data was pooled from three control lines (47-02, 78, F628), three patient lines (47-01, 77, CRA401), and three biological replicates of 77-TSC2-null line. Data are presented as mean  $\pm$  SEM.

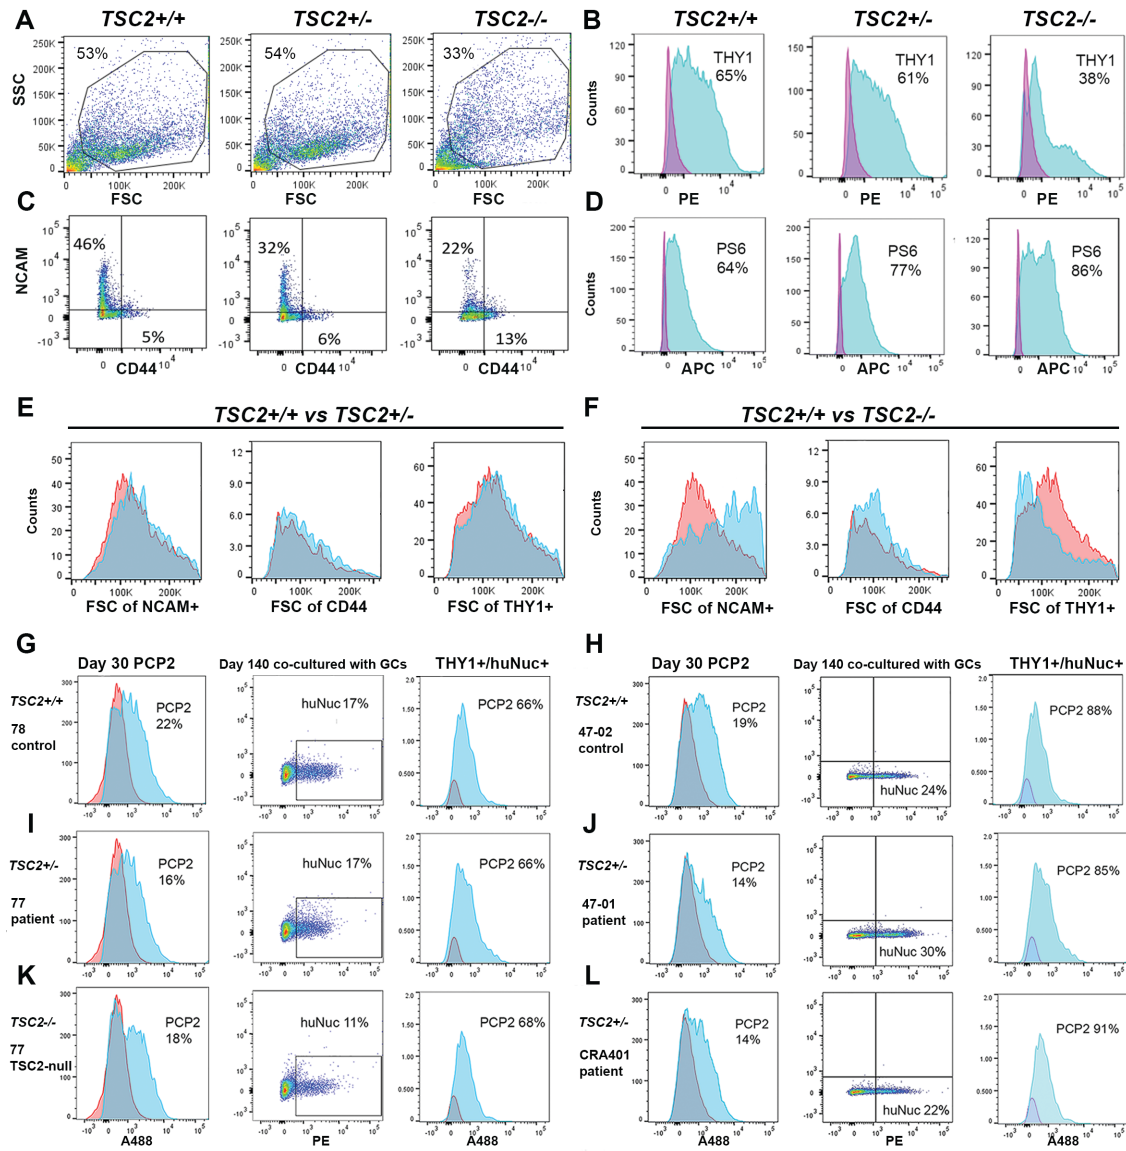

**Supplementary Figure 6. Flow cytometric analyses of *TSC2*-deficient hiPSC-derived cerebellar cell populations.** Representative images of flow cytometric analyses at day 30 of PC-differentiation. **A**) Gating strategy (FSC/SSC) for *TSC2*<sup>+/+</sup>, *TSC2*<sup>+/-</sup>, and *TSC2*<sup>-/-</sup> cell populations; 78 control (*TSC2*<sup>+/+</sup>) 77 patient (*TSC2*<sup>+/-</sup>) and 77-*TSC2*-null (*TSC2*<sup>-/-</sup>). **B**) Representative plots of THY1<sup>+</sup> cells, **C**) NCAM/CD44 cell populations, and **D**) pS6<sup>+</sup> cells. Mean intensities of FSC of NCAM<sup>+</sup>, CD44<sup>+</sup> and THY1<sup>+</sup> cells between *TSC2*<sup>+/-</sup> vs *TSC2*<sup>+/+</sup> lines **E**) and between *TSC2*<sup>-/-</sup> vs *TSC2*<sup>+/+</sup> lines **F**). **G-L**) Representative histograms and dot-plots of PCP2 expression in different cell lines. First panel at left shows PCP2 expression in hiPSC-derived PCs at day 30 of differentiation prior to THY1<sup>+</sup> selection, huNuc expression in co-cultures with mouse GCs at day 140 (middle panel) and PCP2 expression at day 140 in THY1<sup>+</sup>/huNuc<sup>+</sup> PCs (right). 20,000 cells/sample, n=3-4 samples.

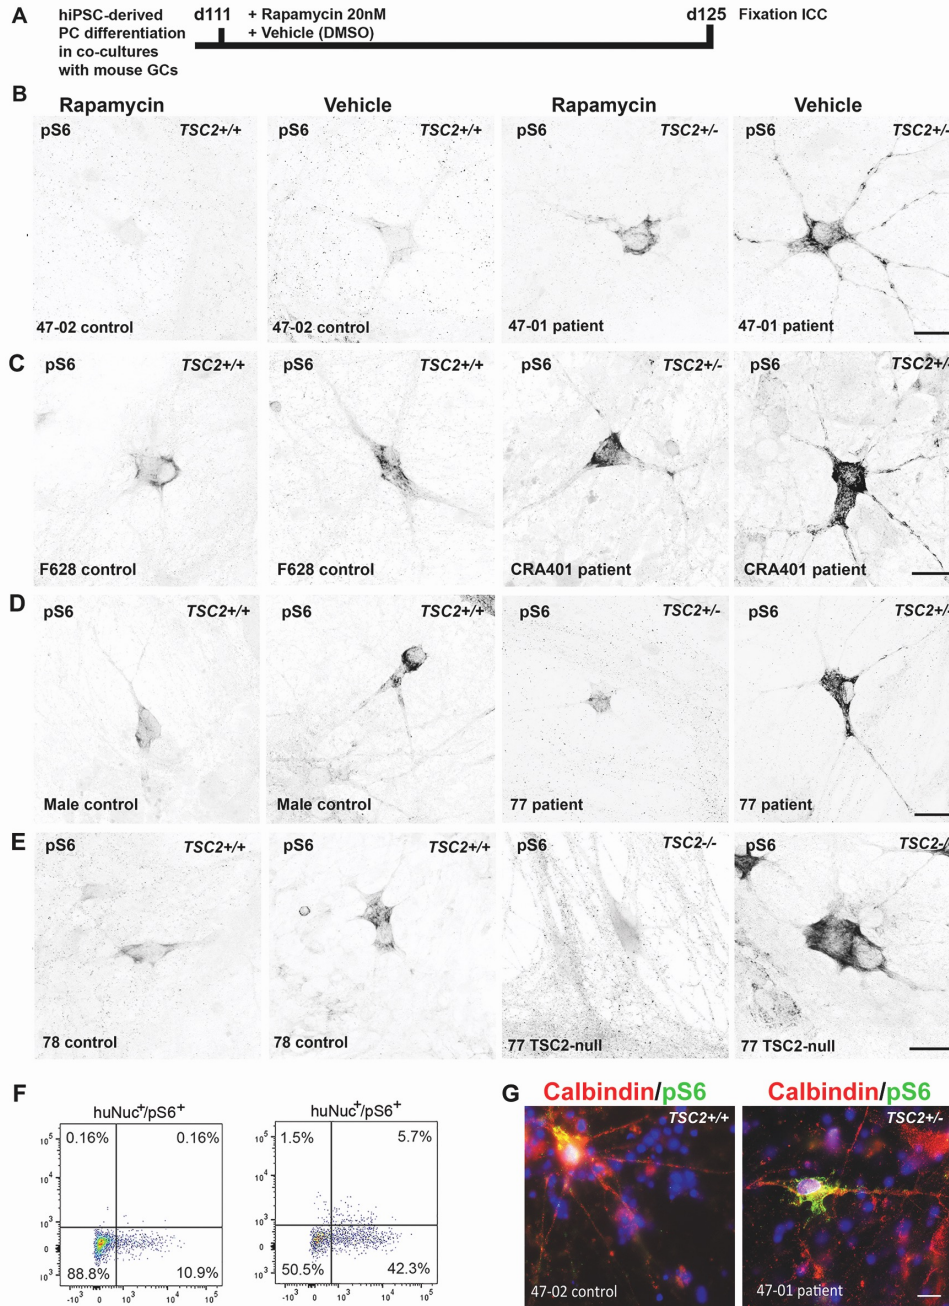

**Supplementary Figure 7. mTOR-pathway activation in  $THY1^+$  hiPSC-PCs.** A. Schematic presentation of the rapamycin 20 nM or vehicle treatment prior to pS6 expression analyses, at day 125 of hiPSC-PC differentiation *in vitro*. B.-E. Representative images of pS6 in huNuc<sup>+</sup> hiPSC-PCs (47-02-, F628-, Male-control, 78-control *TSC2*<sup>+/+</sup>) compared to *TSC2*-deficient hiPSC-PCs (47-01-, CRA401-, 77-patient *TSC2*<sup>+/-</sup>) and *TSC2*-null 77 (*TSC2*<sup>-/-</sup>). Rapamycin treatment decreased significantly the pS6 in *TSC2*-deficient patient PCs during the differentiation process. Scale bar 22  $\mu$ m. F. Flow cytometric analyses of pS6 expression in huNuc<sup>+</sup> PCs show increased pS6<sup>+</sup> cell number in the *TSC2*-deficient cell population compared to the control cell population (47-02-control *TSC2*<sup>+/+</sup> vs 47-01-patient *TSC2*<sup>+/-</sup>). G. Immunocytochemical staining of hiPSC-derived PCs in co-cultures with mouse granular neurons show increased pS6 co-localization (green) with calbindin positive PC (red) in *TSC2*-deficient PC compared to control PC, (47-02-control *TSC2*<sup>+/+</sup> vs 47-01-patient *TSC2*<sup>+/-</sup>). Mouse granular neurons were negative for pS6 and calbindin (small Hoechst-33342 positive-blue cells in figures). Scale bar 17  $\mu$ m.

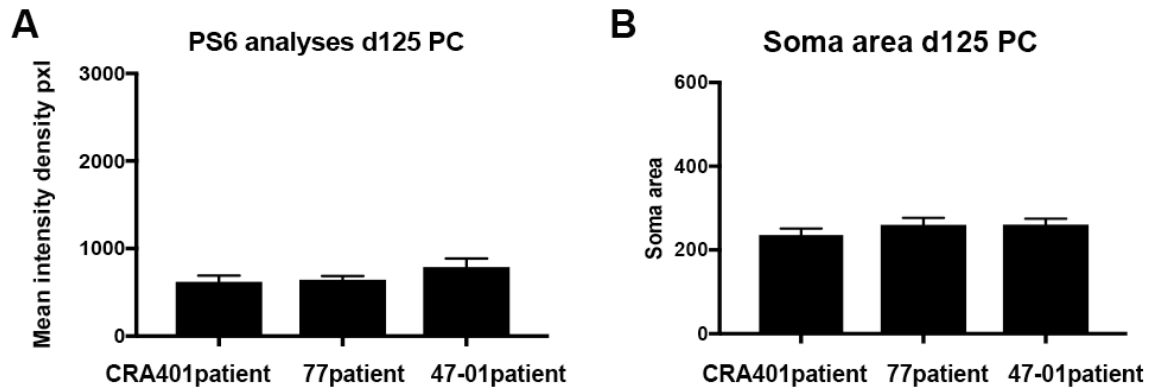

**Supplementary Figure 8. Comparison of mTOR-pathway activation and soma size between different TSC-patient hiPSC-derived PCs. A.** No significant differences in pS6 expression levels were detected between different patient hiPSC-derived PCs (one-way ANOVA). **B.** No significant differences in soma size were detected between different patient hiPSC-derived PCs (one-way ANOVA). Data are presented as mean  $\pm$  SEM.



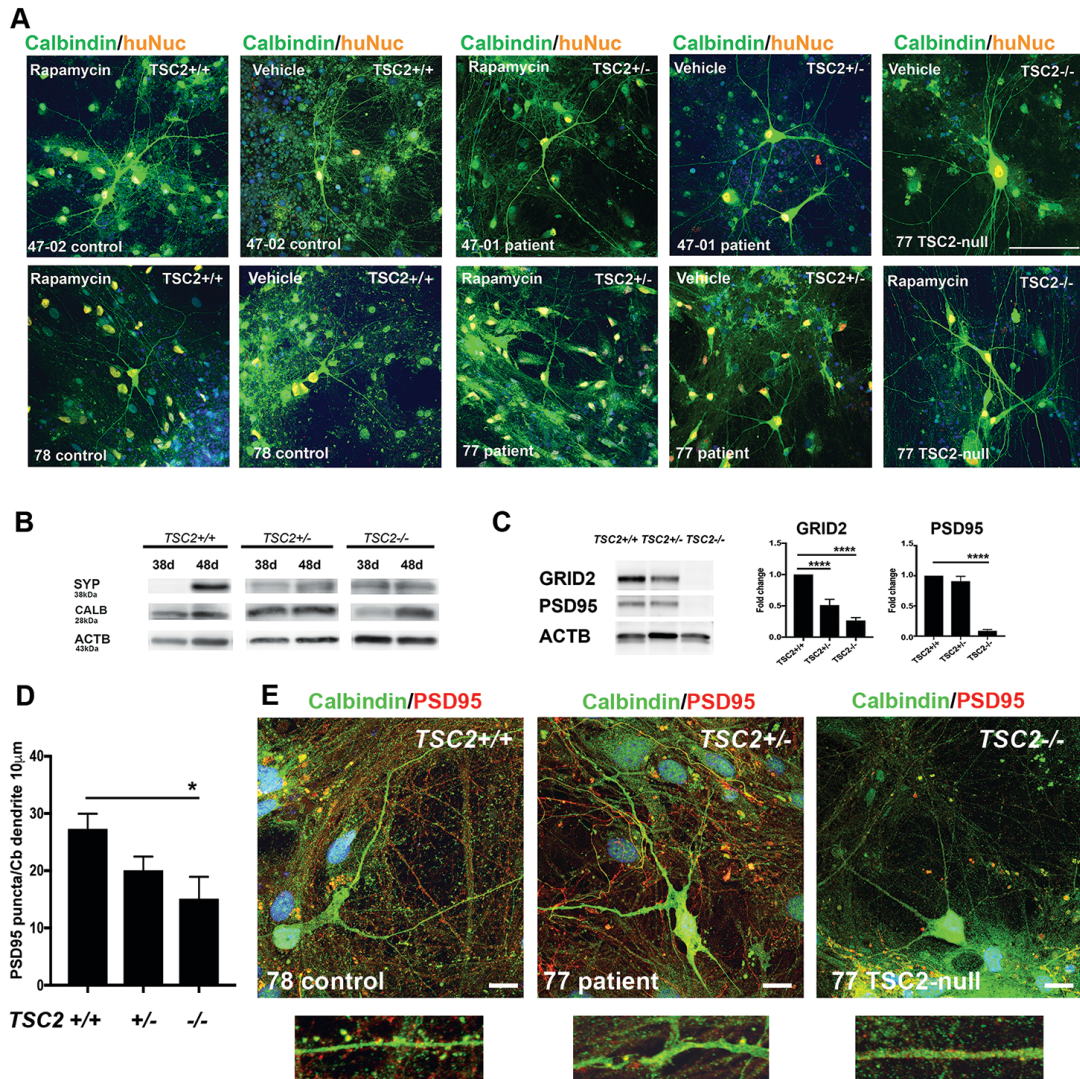

**Supplementary Figure 9. TSC2-deficient THY1<sup>+</sup> hiPSC-PCs have abnormal morphology and synaptic marker expression compared to control cells.** **A.** Representative images of TSC2-deficient PCs with increased soma size and neurite number compared to control cells. TSC2<sup>+/-</sup> (47-01 patient) hiPSC-derived PCs have increased soma size and neurite number compared to TSC2<sup>+/+</sup> (47-02 control) hiPSC-PCs. Both TSC2<sup>+/-</sup> (77 patient) and TSC2<sup>-/-</sup> (77-TSC2-null) hiPSC-PCs have increased soma size and neurite number compared to TSC2<sup>+/+</sup> (78 control) hiPSC-PCs. Rapamycin treatment 20nM for two weeks rescued the morphological deficits of TSC2-mutant cells *in vitro* (see main Figure 3). Scale bar 100  $\mu$ m. **B.** WB analyses of synaptophysin (SYP) and calbindin (CALB) expression at days 38-48 show up-regulation of the synaptic marker in TSC2<sup>+/+</sup> cells during differentiation process. **C.** At day 48 of differentiation GLUR $\delta$ 2 (GRID2) expression was significantly down-regulated in TSC2-deficient cells, (one-way ANOVA, post-hoc-test, \*\*\*\*p<0.0001). PSD95 expression was significantly down-regulated in TSC2<sup>-/-</sup> PCs compared to control PCs (one-way ANOVA, post-hoc-test, \*\*\*\*p<0.0001). **D.** Quantification of PSD95 puncta/10 $\mu$ m calbindin-positive dendrite, significant downregulation of PSD95-puncta was detected in TSC2<sup>-/-</sup> PCs compared to control PCs (one-way ANOVA, post-hoc-test, \*p<0.05). Data are presented as mean  $\pm$  SEM. **E.** Representative images of PSD95 expression in calbindin positive hiPSC-PCs (TSC2<sup>+/+</sup>, TSC2<sup>+/-</sup> and TSC2<sup>-/-</sup>) at day 125 of differentiation, scale bar 10  $\mu$ m, higher magnification shows PSD95 puncta in calbindin-positive dendrite.

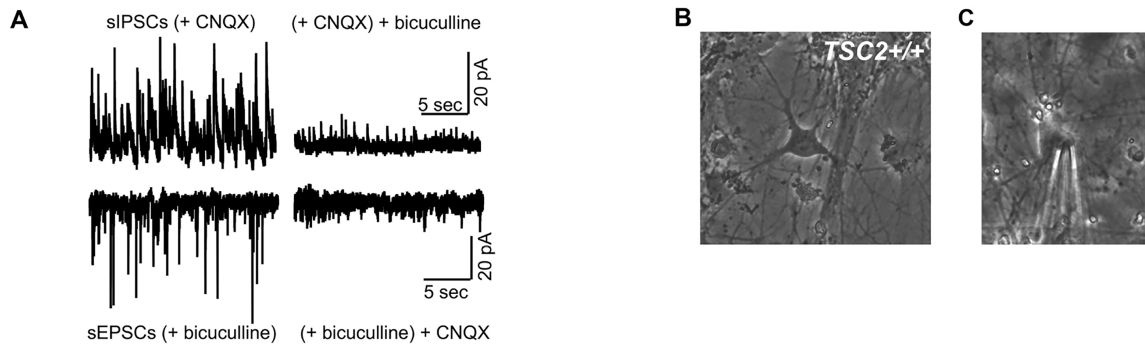

**Supplementary Figure 10. Electrophysiological characterization of TSC2-deficient hiPSC-PCs.**

**A.** hiPSC-derived PCs display synaptic activity as shown by spontaneous IPSCs and EPSCs. Spontaneous IPSCs at 0mV from control (*TSC2<sup>+/+</sup>*) PCs were blocked by perfusion of 30  $\mu$ M bicuculline. Spontaneous EPSCs at -70mV from (*TSC2<sup>+/+</sup>*) PCs were blocked by perfusion of 10  $\mu$ M CNQX. **B-C.** Representative bright-field images of patch-clamped hiPSC-PCs, **C)** with patch-clamp pipet.

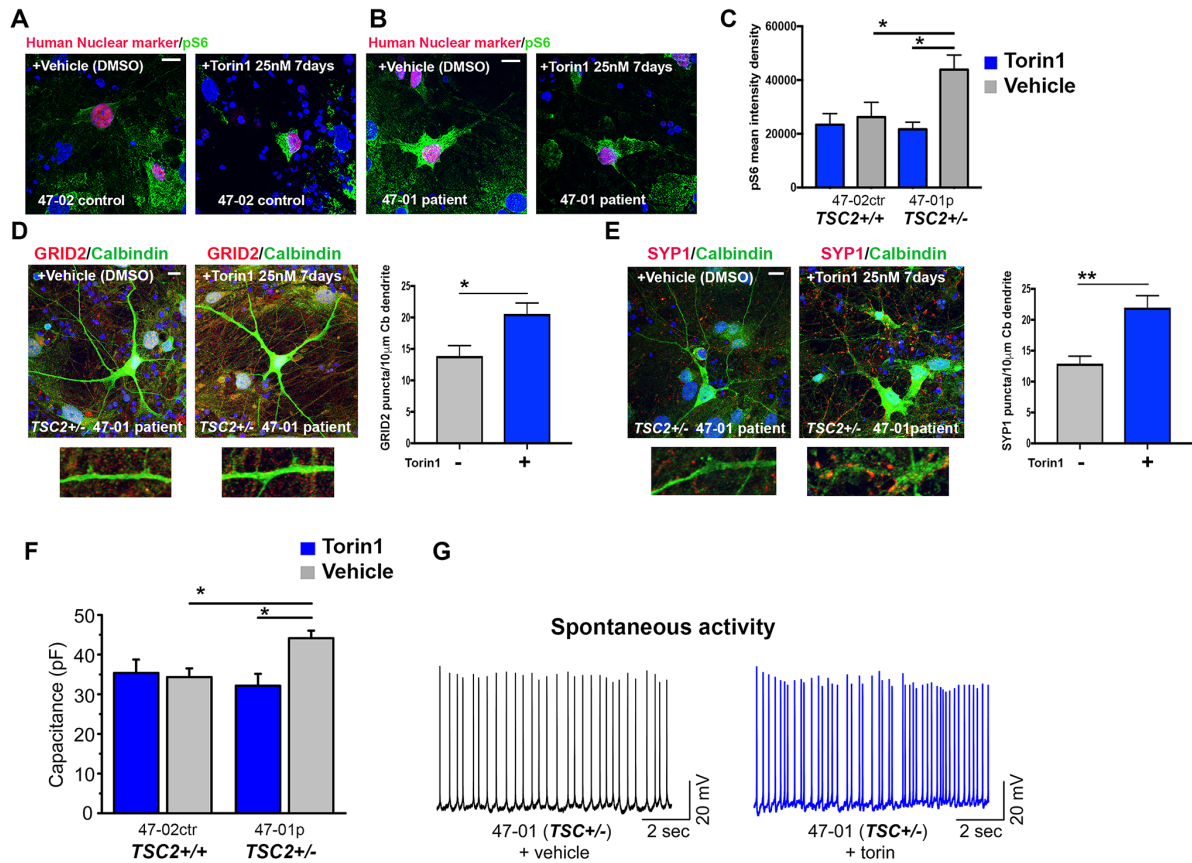

**Supplementary Figure 11. Characterization of Torin1 treated TSC2-deficient hiPSC-derived PCs.** **A.** Control hiPSC-PCs ( $TSC2^{+/+}$ , 47-02ctr) and **B.** TSC2-deficient patient hiPSC-derived PCs ( $TSC2^{+/-}$ , 47-01p) were treated with Torin1 25nM for 1 week *in vitro* and pS6-staining intensities were measured with ImageJ. **C.** Quantification of pS6 mean intensity densities. Torin1-treatment decreased significantly the pS6 expression levels in TSC2-deficient patient hiPSC-derived PCs. Two-way ANOVA and post-hoc-tests, (\* $p < 0.05$ ),). **D.** GRID2 expression in CALB1-positive hiPSC-PCs were analyzed from confocal images with ImageJ-software. Higher magnification shows GRID2 puncta in CALB1-positive dendrite. Torin1 treatment increased significantly the GRID2 expression in CALB1-positive TSC2-deficient PCs (\* $p < 0.05$ ). **E.** SYP1 expression in CALB1-positive PCs were analyzed from confocal images with ImageJ-software. Higher magnification shows SYP1 puncta in CALB1-positive dendrite. Torin1 treatment increased significantly the SYP1 expression in CALB1-positive TSC2-deficient PCs (\*\* $p < 0.001$ ). All scale bars 10  $\mu$ m. **F.** TSC2-deficient hiPSC-PCs had increased capacitance compared to control cells, which was significantly decreased after Torin1 treatment in  $TSC2^{+/-}$  PCs to similar levels with control PCs ( $TSC2^{+/+}$ ). Two-way ANOVA and post-hoc-tests, (\* $p < 0.05$ ). Data are presented as mean  $\pm$  SEM. **G.** Representative traces of spontaneous activity in TSC2-deficient hiPSC-PCs treated with vehicle or Torin1.





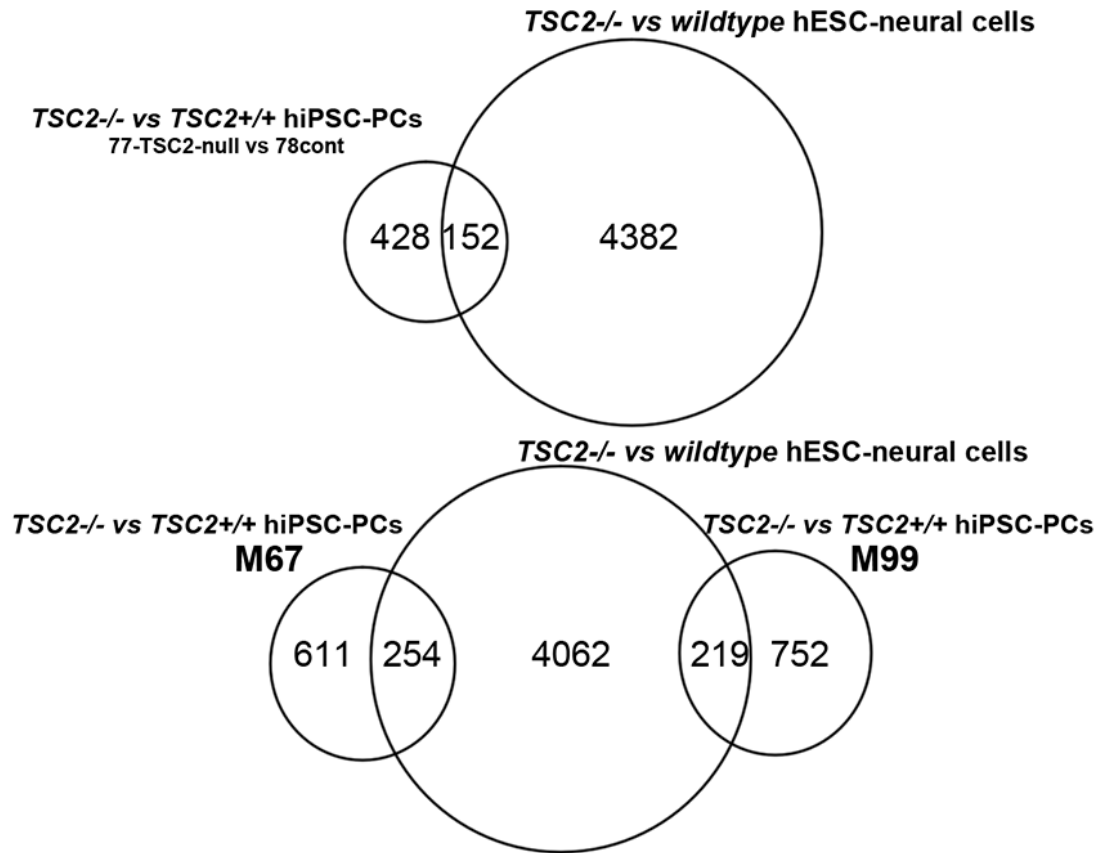

**Supplementary Figure 13. Transcriptional profiling of TSC2-deficient THY1<sup>+</sup> hiPSC-PCs compared to hESC-derived neural cell populations.**

**A.** Differentially expressed genes between TSC2-deficient hiPSC-PCs compared with a prior study of TSC2-deficient hESC-derived neural cells (Grabole et al., 2016). Venn-diagram of differentially expressed genes between *TSC2*<sup>-/-</sup> and *TSC2*<sup>+/+</sup> hiPSC derived PCs compared to *TSC2*<sup>-/-</sup> and *TSC2*<sup>+/+</sup> hESC-derived neural cells (Grabole et al., 2016). There is a highly significant overlap between these two groups of genes ( $p = 2.56e-07$ , hypergeometric probability). **B.** Module 67 contains genes that are upregulated in *TSC2*<sup>-/-</sup> hiPSC derived PCs and Module 99 contains genes downregulated in *TSC2*<sup>-/-</sup> hiPSC derived PCs compared to control PCs (*TSC2*<sup>+/+</sup>), and the genes in these modules were compared with differentially expressed genes identified in *TSC2*<sup>-/-</sup> hESC derived neural cells vs wildtype control cells. There is a significant overlap between both co-expression modules and the prior study (M67  $p = 8.61e-17$ , M99  $p = 1.66e-4$ , hypergeometric probability).

**Supplementary Table 1.** Clinical information about the patient and control subjects enrolled for the hiPSC-derivation.

| Subject                                 | Age years | Sex | Genotype                                                                                                                        | Diagnosis                                                             |
|-----------------------------------------|-----------|-----|---------------------------------------------------------------------------------------------------------------------------------|-----------------------------------------------------------------------|
| 47-02<br>SAH0047-02                     | 46        | F   | <i>TSC2</i> <sup>+/+</sup>                                                                                                      | Control<br>(mother of the patient 47-01)                              |
| 47-01<br>SAH0047-01                     | 5         | M   | <i>TSC2</i> <sup>+/-</sup><br>Heterozygous mutation,<br>Chr16:2072890_insA                                                      | Tuberous sclerosis complex, cortical tubers, epilepsy and autism.     |
| 78<br>01578.104.10                      | 46        | M   | <i>TSC2</i> <sup>+/+</sup>                                                                                                      | Control<br>(father of the patient 77)                                 |
| 77<br>01577.101.10                      | 11        | F   | <i>TSC2</i> <sup>+/-</sup><br>Heterozygous mutation,<br>Chr16:2088303-2088320_del 18bp                                          | Tuberous sclerosis complex, cortical tubers, epilepsy.                |
| 77- <i>TSC2</i> null<br>01577.101.06201 | 11        | F   | <i>TSC2</i> <sup>-/-</sup><br>Compound heterozygous mutation,<br>Chr16:2088303-2088320_del 18bp<br>Chr16:2088299-2088306_del8bp | TALEN induced <i>TSC2</i> knock-out cell line from patient 77 hiPSCs. |
| CRISPR-cas9-corrected 77                | 11        | F   | <i>TSC2</i> <sup>+/+</sup>                                                                                                      | CRISPR-cas9-sgRNA and ssODN transfected patient 77-hiPSC-clone.       |
| Female control<br>628                   |           | F   | <i>TSC2</i> <sup>+/+</sup>                                                                                                      | Control<br>(fetal control)                                            |
| CRA401                                  | 6         | F   | <i>TSC2</i> <sup>+/-</sup><br>Heterozygous mutation.<br>Chr16(GRCh37):g.2135002_2135005del                                      | Tuberous sclerosis complex, cortical tubers, epilepsy and autism.     |
| Male control<br>BJ                      |           | M   | <i>TSC2</i> <sup>+/+</sup>                                                                                                      | Control<br>(newborn control)                                          |

**Supplementary Table 2. A.** Primary antibodies and **B.** secondary antibodies used for immunocytochemical staining, and flow cytometry.

**A. Primary antibodies**

| <b>Antibody</b>      | <b>Isotype</b> | <b>Dilution</b> | <b>Company and catalog number</b> |
|----------------------|----------------|-----------------|-----------------------------------|
| $\beta$ -TUBULIN III | Mouse IgG      | 1:600           | Chemicon/Millipore MAB1637        |
| CALBINDIN            | Rabbit IgG     | 1:400           | Chemicon/Millipore AB1778         |
| CD44                 | Mouse IgG      | 1:250           | Biolegend 338803                  |
| GRID2                | Goat IgG       | 1:20            | Santa-Cruz sc-26118               |
| huNUC                | Mouse IgG      | 1:200           | Chemicon/Millipore MAB1281        |
| KIRREL2 (Neph3)      | Goat IgG       | 1:200           | Santa-Cruz sc-70195               |
| KI67                 | Rabbit IgG     | 1:500           | Abcam Ab15580                     |
| LHX1                 | Rabbit IgG     | 1:100           | Jessell Lab                       |
| NANOG                | Rabbit IgG     | 1:250           | Abcam Ab109250                    |
| NCAM                 | Mouse IgG      | 1:250           | Novus Biologicals NBP2-34397APC   |
| OCT4                 | Rabbit IgG     | 1:250           | Abcam Ab181557                    |
| PCP2                 | Rabbit IgG     | 1:400           | Takara M202                       |
| Phospho S6           | Rabbit IgG     | 1:300           | Biolegend, Cell Signaling 4851    |
| PTF1a                | Goat IgG       | 1:100           | R&D Systems AF6119                |
| SKOR2                | Rabbit IgG     | 1:100           | Sigma HPA046206                   |
| SSEA-4               | Mouse IgG      | 1:250           | Invitrogen 414000                 |
| THY-1                | Mouse IgG      | 1:100           | Biolegend 328102                  |
| TRA-1-60             | Mouse IgG      | 1:250           | Invitrogen 41-1000                |

**B. Secondary antibodies**

|                       |            |       |                          |
|-----------------------|------------|-------|--------------------------|
| Alexa 488-anti-rabbit | Donkey IgG | 1:400 | Life Technologies A21206 |
| Alexa 594-anti-mouse  | Donkey IgG | 1:400 | Life Technologies A21203 |
| Alexa 647-anti-goat   | Donkey IgG | 1:400 | Life Technologies A21447 |
| Alexa 647-anti-rabbit | Donkey IgG | 1:400 | Life Technologies A31573 |
| Anti-mouse PE         | Goat IgG   | 1:200 | Biolegend 40667          |

**Supplementary Table 3.** Antibodies used for western blot analyses.

| <b>Antibody</b>       | <b>Isotype</b> | <b>Dilution</b> | <b>Company and catalog number</b> |
|-----------------------|----------------|-----------------|-----------------------------------|
| GAPDH                 | Mouse IgG      | 1:1000          | Ambion, AM 4300                   |
| ACTB                  | Rabbit IgG     | 1:1000          | Cell Signaling Technology #4970   |
| CALBINDIN             | Rabbit IgG     | 1:400           | Chemicon/Millipore AB1778         |
| Cleaved Caspase 3     | Rabbit IgG     | 1:1000          | Cell Signaling Technology #9664   |
| CYCLIN D1             | Rabbit IgG     | 1:1000          | Cell Signaling Technology #2978   |
| FMRP                  | Rabbit IgG     | 1:1000          | Cell Signaling Technology #4317S  |
| GFAP                  | Mouse IgG      | 1:2500          | Sigma, GM3893                     |
| GlurD2 /GRID2         | Goat IgG       | 1:20            | Santa-Cruz sc-26118               |
| HO-1                  | Mouse IgG      | 1:1000          | Enzo AD1-OSA-110                  |
| LC3B                  | Rabbit IgG     | 1:1000          | Cell Signalling Technology #3868  |
| Phospho 4EBP1         | Rabbit IgG     | 1:1000          | Cell Signaling Technology #2855S  |
| Phospho S6            | Rabbit IgG     | 1:1000          | Cell Signaling Technology #5364   |
| Phospho p70 S6 kinase | Mouse IgG      | 1:1000          | Cell Signaling Technology #9234   |
| P70 S6 kinase         | Rabbit IgG     | 1:1000          | Cell Signaling Technology #2708   |
| PSD95                 | Mouse IgG      | 1:1000          | UC Davis, 75-028                  |
| S6                    | Mouse IgG      | 1:1000          | Cell Signaling Technology #2317   |
| Synaptophysin         | Rabbit IgG     | 1:1000          | Cell Signaling Technology #5461P  |
| 4EBP1                 | Rabbit IgG     | 1:1000          | Cell Signaling Technology #9644S  |
| TSC2                  | Rabbit IgG     | 1:1000          | Cell Signaling Technology #4308   |

**Supplementary Table 4.** Electrophysiological characterization of hiPSC-PCs.

| Purkinje cell line              | 4702 ( <i>TSC2<sup>+/+</sup></i> ) |               | 4701 ( <i>TSC2<sup>+/+</sup></i> )   |               |                                  |              |
|---------------------------------|------------------------------------|---------------|--------------------------------------|---------------|----------------------------------|--------------|
|                                 | Vehicle                            | Rapamycin     | Vehicle                              | Rapamycin     |                                  |              |
| Capacitance (pF)                | 34±2, n=39                         | 34±3, n=17    | 44±2, n=65                           | 34±2, n=53    |                                  |              |
| Input Resistance (MΩ)           | 378±50, n=25                       | 356±37, n=17  | 287±16, n=54                         | 356±19, n=42  |                                  |              |
| Resting membrane potential (mV) | -59±2, n=25                        | -58±1, n=17   | -61±1, n=39                          | -54±1, n=36   |                                  |              |
| Action potential threshold (mV) | -54±1, n=25                        | -57±1, n=17   | -52±1, n=54                          | -52±1, n=40   |                                  |              |
| Spontaneous firing rate (Hz)    | 4.9±0.7, n=10                      | 7.4±0.8, n=12 | 1.7±0.5, n=23                        | 2.7±0.4, n=25 |                                  |              |
| Rheobase (pA)                   | 26±2, n=22                         | 23±5, n=17    | 41±5, n=54                           | 24±2, n=40    |                                  |              |
|                                 |                                    |               |                                      |               |                                  |              |
| Purkinje cell line              | 78 ( <i>TSC2<sup>+/+</sup></i> )   |               | 77 ( <i>TSC2<sup>+/+</sup></i> )     |               | 77 ( <i>TSC2<sup>-/-</sup></i> ) |              |
|                                 | Vehicle                            | Rapamycin     | Vehicle                              | Rapamycin     | Vehicle                          | Rapamycin    |
| Capacitance (pF)                | 30±1, n=35                         | 28±1, n=30    | 40±2, n=39                           | 32±2, n=31    | 61±3, n=25                       | 46±2, n=25   |
| Input Resistance (MΩ)           | 378±31, n=35                       | 392±31, n=30  | 293±14, n=39                         | 368±27, n=31  | 171±22, n=25                     | 251±25, n=25 |
| Resting membrane potential (mV) | -59±1, n=35                        | -59±1, n=30   | -57±1, n=39                          | -54±1, n=31   | -63±1, n=25                      | -59±1, n=25  |
| Action potential threshold (mV) | -45±1, n=35                        | -45±1, n=30   | -47±1, n=39                          | -48±1, n=31   | -47±1, n=25                      | -51±1, n=25  |
| Spontaneous firing rate (Hz)    | 0.48±0.04, n=8                     | 0.6±0.1, n=4  | 1.1±0.2, n=28                        | 2.0±0.3, n=15 | 0.3±0.1, n=5                     | 0.7±0.3, n=4 |
| Rheobase (pA)                   | 47±3, n=35                         | 47±4, n=30    | 54±4, n=39                           | 36±4, n=39    | 107±9, n=25                      | 63±6, n=25   |
| miniEPSC frequency (Hz)         | 1.0±0.3, n=8                       | 0.9±0.2, n=8  | 0.4±0.1, n=7                         | 0.7±0.1, n=7  | 0.23±0.04, n=9                   | .6±.2, n=9   |
| miniEPSC amplitude (pA)         | 19±2, n=8                          | 20±1, n=8     | 19±2, n=7                            | 21±2, n=7     | 15±1, n=9                        | 17±2, n=9    |
| miniEPSC decay tau (ms)         | 4.2±0.2, n=8                       | 3.9±0.1, n=8  | 4.1±0.3, n=7                         | 4.3±0.4, n=7  | 3.8±0.1, n=9                     | 4.0±0.2, n=9 |
|                                 |                                    |               |                                      |               |                                  |              |
| Purkinje cell line              | F628 ( <i>TSC2<sup>+/+</sup></i> ) |               | CRA401 ( <i>TSC2<sup>+/+</sup></i> ) |               |                                  |              |
|                                 | Vehicle                            | Rapamycin     | Vehicle                              | Rapamycin     |                                  |              |
| Capacitance (pF)                | 26±2, n=15                         | 23±3, n=14    | 38±4, n=15                           | 28±3, n=11    |                                  |              |
| Input Resistance (MΩ)           | 403±52, n=15                       | 441±48, n=14  | 322±32, n=15                         | 402±41, n=11  |                                  |              |
| Resting membrane potential (mV) | -56±3, n=15                        | -57±3, n=14   | -60±2, n=15                          | -54±2, n=11   |                                  |              |
| Action potential threshold (mV) | -50±1, n=15                        | -52±3, n=12   | -48±2, n=13                          | -54±0.8, n=11 |                                  |              |
| Spontaneous firing rate (Hz)    | 3.3±0.6, n=11                      | 3.0±0.6, n=10 | 0.9±0.1, n=5                         | 3.3±0.6, n=8  |                                  |              |
| Rheobase (pA)                   | 23±5, n=15                         | 25±8, n=14    | 38±5, n=14                           | 30±7, n=11    |                                  |              |
|                                 |                                    |               |                                      |               |                                  |              |
| <b>All data are mean±SEM</b>    |                                    |               |                                      |               |                                  |              |

**Supplementary Table 5.** Human specific primers for qRT-PCR.

| <b>Gene name</b> | <b>Primer sequence</b>  |
|------------------|-------------------------|
| <i>GAPDH F</i>   | CAGCCTCAAGATCATCAGCA    |
| <i>GAPDH R</i>   | TGTGGTCATGAGTCCTTCCA    |
| <i>OTX2 F</i>    | ACAAGTGGCCAATTCCTCC     |
| <i>OTX2 R</i>    | GAGGTGGACAAGGGATCTGA    |
| <i>EN1 F</i>     | GAGCGCAGGGCACCAAATA     |
| <i>EN1 R</i>     | CGAGTCAGTTTTGACCACGG    |
| <i>EN2 F</i>     | GGCGTGGGTCTACTGTACG     |
| <i>EN2 R</i>     | TACCTGTTGGTCTGGAACCTCG  |
| <i>HOXA2 F</i>   | CGTCGCTCGCTGAGTGCCTG    |
| <i>HOXA2 R</i>   | TGTCGAGTGTGAAAGCGTCGAGG |
| <i>GBX2 F</i>    | GACGAGTCAAAGGTGGAAGAC   |
| <i>GBX2 R</i>    | GATTGTTCATCCGAGCTGTAGTC |
| <i>GABRA2 F</i>  | CAGAGAATCTGTGCCTGCAA    |
| <i>GABRA2 R</i>  | CATAAGCCACTTTGGGGAGA    |
| <i>GAD1 F</i>    | CAGCCTGCCTATTTCCAAAG    |
| <i>GAD2 R</i>    | AAATCCAGCTCACGGTTTTG    |
| <i>PCP2 F</i>    | GGGACATGATGGATCAGGAG    |
| <i>PCP2 R</i>    | TGGCTCAGCAGATTGAAGAA    |
| <i>XRN1 F</i>    | GGGAAGCCCTTCCATCATA     |
| <i>XRN1 R</i>    | GGCTGGCTAGTCTGAACTGG    |
| <i>TIAL1 F</i>   | TATACGGCAACCATGGAAT     |
| <i>TIAL1 R</i>   | CATATCCGGCTTGTTAGGA     |
| <i>TIA1 F</i>    | CATGGAACCAGCAAGGATTT    |
| <i>TIA1 R</i>    | CACTCCCTGTAGCCTCAAGC    |
| <i>CHRNA7 F</i>  | TGTGGATAGCTGCAAAGTGC    |
| <i>CHRNA7 R</i>  | TATGCCTGGAGGCAGGTACT    |
| <i>FMRI F</i>    | GGCGGCACATAAGGATTTTA    |
| <i>FMRI R</i>    | TATGTGCTCGCTTTGAGGTG    |
| <i>FXR1 F</i>    | AGTGTTTCAGGGGGTCGAG     |
| <i>FXR1 R</i>    | ACCGCCTACGACGGTTAGTA    |
| <i>EPHA4 F</i>   | GGGCTGTGACAATCTGGAAT    |
| <i>EPHA4 R</i>   | AATCAACAGGAAGGGCTGTG    |
| <i>GLRB F</i>    | TGTCCTTGTGAGCATGAGGT    |
| <i>GLRB R</i>    | AACCAAAGCTCTCCAGTTGC    |
| <i>HDAC6 F</i>   | CCATGGAAATTCTGGACACC    |
| <i>HDAC6 R</i>   | GGCATATCCTCCCCAAACTT    |
| <i>STXBPI F</i>  | GTTCTCTGCCTCCTCAGC      |
| <i>STXBPI R</i>  | GCATCTCATTGAGGCTCACA    |
| <i>ROBO1 F</i>   | GAAATGCAGGTACTTGGAGGA   |
| <i>ROBO1 R</i>   | TCTGGCGTCATGTGTCATCT    |
| <i>VDAC1 F</i>   | ACTGCAAAAATCCCGAGTGAC   |
| <i>VDAC1 R</i>   | AGCGCGTGTACTGTTTCTT     |
| <i>CAPRIN F</i>  | GGCTTGATGAATGGATACCG    |
| <i>CAPRIN R</i>  | GAGCCTCGCTTGAAATTCTG    |
| <i>MFF F</i>     | CAACCATTGAAGGAACGTCA    |
| <i>MFF R</i>     | CGAAACCAGAGCCAGCTATT    |

| <b>Gene name</b>  | <b>Primer sequence</b> |
|-------------------|------------------------|
| <i>IRS-1 F</i>    | TACTCAAAAAGGGAGCGGAGA  |
| <i>IRS-1 R</i>    | CGGACACTGCACAACAGTCT   |
| <i>PIK3CA F</i>   | GTCAATCGGTGACTGTGTGG   |
| <i>PIK3CA R</i>   | GAAGTGCAGTGCACCTTCA    |
| <i>PTEN F</i>     | CATAACGATGGCTGTGGTTG   |
| <i>PTEN R</i>     | CCCCACTTTAGTGCACAGT    |
| <i>AKT1 F</i>     | TCTATGGCGCTGAGATTGTG   |
| <i>AKT1 R</i>     | CTTAATGTGCCCGTCCTTGT   |
| <i>PDPK1 F</i>    | TCAGGGCGTCTGGTTATAGG   |
| <i>PDPK1 R</i>    | GAAGAACGCACGGAAGAGTC   |
| <i>TSC2 F</i>     | CCCCAAACAAGGCTTGAATA   |
| <i>TSC2 R</i>     | CGGACCACATGTTTCAGACAC  |
| <i>TSC1 F</i>     | AAATGGTCATGGGGATGAAA   |
| <i>TSC1 R</i>     | TCTGCTGGCTACATGAAACG   |
| <i>RHEB F</i>     | CCAAGGAGCAGCTGTAAAGG   |
| <i>RHEB R</i>     | TAGCTGCAAAAAGGAATCGT   |
| <i>MAPK3 F</i>    | AGTACATCCACTCCGCCAAC   |
| <i>MAPK3 R</i>    | CAGGCCGAAATCACAAATCT   |
| <i>MAPK1 F</i>    | CCAGACCATGATCACACAGG   |
| <i>MAPK1 R</i>    | GACTTGGTGTAGCCCTTGA    |
| <i>MAP2K7 F</i>   | GGGCTGCCTGGTTTTATTTT   |
| <i>MAP2K7 R</i>   | AGGGTCCCCACTTAACACT    |
| <i>PRKAA1 F</i>   | AGCCAAATCAGGGACTGCTA   |
| <i>PRKAA1 R</i>   | TTTTCTTGAGCCTCAGCAT    |
| <i>RPS6KB1 F</i>  | ATTTCTGGGGAAGAGGTGCT   |
| <i>RPS6KB1 R</i>  | ATGCTTCCCCACTCATTGTC   |
| <i>RPS6 F</i>     | CATGAAGCAGGGTGTCTTGA   |
| <i>RPS6 R</i>     | ACAATGCAACCACGAACTGA   |
| <i>EIF4E F</i>    | TTATCAGTCCCACGCAGACA   |
| <i>EIF4E R</i>    | ATTGCTTGACGCAGTCTCCT   |
| <i>EIF4EBP1 F</i> | GATACCTCCTTGTGCCTCCA   |
| <i>EIF4EBP1 R</i> | GAAGGGTTCGTTCTTGTCCA   |
| <i>EIF4G1 F</i>   | CATCTTTGTACGGCATGGTG   |
| <i>EIF4G1 R</i>   | CAGTAGACAGATGCCAGCA    |
| <i>AKT1S1 F</i>   | CCAGAGAGGACAACGAGGAG   |
| <i>AKT1S1 R</i>   | CATCACAAGAGCCCTCCAT    |
| <i>mTOR F</i>     | AGTGGACCAGTGGAAACAGG   |
| <i>mTOR R</i>     | CCATTCCAGCCAGTCATCTT   |
| <i>K-RAS F</i>    | CACGGTCATCCAGTGTGTC    |
| <i>K-RAS R</i>    | TTGATTTGTCAGCAGGACCA   |

|                   |                       |
|-------------------|-----------------------|
| <i>A-RAF F</i>    | AGGTGATCCGTATGCAGGAC  |
| <i>A-RAF R</i>    | TGTGGCTGTAAGGCAGTGAG  |
| <i>TP53 F2</i>    | AGGCCTTGGA ACTCAAGGAT |
| <i>TP53 R2</i>    | TTATGGCGGGAGGTAGACTG  |
| <i>CYCLIND1 F</i> | AACTACCTGGACCGCTTCCT  |
| <i>CYCLIND1 R</i> | GGGGATGGTCTCCTTCATCT  |

**Supplementary Table 6. Transcriptional gene-expression analyses of THY1<sup>+</sup> hiPSC-PCs.**

**A. 47-01 patient vs 47-02 control hiPSC-PCS**

| <b>Gene Symbol</b> | <b>All refseq transcripts</b>    | <b>Sequencing gene ID</b> | <b>Mean Counts</b> | <b>Log2 Fold Change</b> | <b>P-value</b> | <b>BH adjusted p-value</b> |
|--------------------|----------------------------------|---------------------------|--------------------|-------------------------|----------------|----------------------------|
| <i>TTY15</i>       | NR_001545                        | MSTRG.34406               | 176.70392<br>95    | 7.265140<br>996         | 7.78E-46       | 3.05E-42                   |
| <i>XIST</i>        | NR_001564                        | MSTRG.33716               | 423.24375<br>78    | -<br>7.589148<br>973    | 1.57E-37       | 3.85E-34                   |
| <i>IRX2</i>        | NM_001134222                     | MSTRG.25453               | 621.45080<br>78    | -<br>5.569552<br>148    | 4.73E-36       | 1.03E-32                   |
| <i>TMED7</i>       | NM_181836                        | MSTRG.26307               | 49.816979<br>51    | -<br>5.892672<br>687    | 9.30E-29       | 1.82E-25                   |
| <i>IRX1</i>        | NM_024337                        | MSTRG.25445               | 459.60791<br>67    | -<br>4.776729<br>747    | 3.30E-22       | 5.39E-19                   |
| <i>ZNF714</i>      | NM_182515                        | MSTRG.16615               | 268.44376<br>16    | 2.919112<br>672         | 1.28E-15       | 1.56E-12                   |
| <i>NA</i>          | NA                               | MSTRG.34412               | 48.916581<br>27    | 4.244999<br>219         | 6.70E-15       | 7.72E-12                   |
| <i>C5orf38</i>     | NM_001294337,<br>NM_001306150    | MSTRG.25454               | 88.963966<br>13    | -<br>3.910118<br>326    | 5.76E-13       | 6.27E-10                   |
| <i>LOC284581</i>   | NR_046098                        | MSTRG.2734                | 12.334200<br>32    | -<br>4.241816<br>04     | 6.23E-13       | 6.43E-10                   |
| <i>CUZD1</i>       | NM_022034,NM_001204364           | MSTRG.4447                | 40.484740<br>9     | -<br>3.664638<br>231    | 2.82E-12       | 2.77E-09                   |
| <i>PCDH7</i>       | NM_002589,NM_032456,NM_001173523 | MSTRG.24300               | 210.36706<br>09    | 3.569175<br>728         | 1.84E-11       | 1.64E-08                   |
| <i>NA</i>          | NA                               | MSTRG.8589                | 36.102608<br>95    | -<br>4.307541<br>754    | 2.14E-11       | 1.82E-08                   |



|                          |                                             |                     |                 |                      |          |          |
|--------------------------|---------------------------------------------|---------------------|-----------------|----------------------|----------|----------|
| <i>ZNF718</i>            | NM_001039127                                | MSTRG.24027         | 129.00166<br>64 | -<br>2.026251<br>811 | 2.50E-11 | 2.04E-08 |
| <i>TCEAL5</i>            | NM_001012979                                | MSTRG.33908         | 166.28950<br>22 | 3.192873<br>329      | 2.64E-11 | 2.07E-08 |
| <i>LINC01194</i>         | NR_033383                                   | MSTRG.25505         | 10.745253<br>65 | -<br>4.229302<br>567 | 3.32E-11 | 2.50E-08 |
| <i>LOC100128<br/>885</i> | NR_077227                                   | MSTRG.29356         | 25.274533<br>84 | -<br>3.957144<br>151 | 3.83E-11 | 2.78E-08 |
| <i>AJAP1</i>             | NM_001042478,<br>NM_018836                  | ENSG00000196<br>581 | 69.140823<br>86 | -<br>3.757115<br>191 | 9.02E-11 | 6.31E-08 |
| <i>PKIB</i>              | NM_001270394,<br>NM_181795,NM<br>_001270395 | MSTRG.28374         | 597.06661<br>73 | -<br>2.776842<br>893 | 1.46E-10 | 9.89E-08 |
| <i>HLA-DRB6</i>          | NR_001298,NM<br>_002124                     | MSTRG.27587         | 21.880446<br>83 | 3.914917<br>053      | 1.57E-10 | 1.02E-07 |
| <i>FAM46B</i>            | NM_052943                                   | MSTRG.584           | 103.12910<br>28 | -<br>2.902923<br>473 | 1.77E-10 | 1.08E-07 |
| <i>NA</i>                | NA                                          | MSTRG.16632         | 19.892843<br>3  | -<br>3.953434<br>517 | 2.54E-10 | 1.51E-07 |
| <i>FAM45BP</i>           | NR_027141                                   | MSTRG.34130         | 49.185361<br>96 | -<br>2.900913<br>154 | 3.00E-10 | 1.73E-07 |
| <i>NA</i>                | NA                                          | MSTRG.30415         | 69.970820<br>4  | -<br>3.294363<br>599 | 5.54E-10 | 3.10E-07 |
| <i>TMSB4Y</i>            | NM_004202                                   | MSTRG.34411         | 16.406998<br>41 | 3.894246<br>069      | 5.87E-10 | 3.19E-07 |
| <i>LINC01060</i>         | NR_033869                                   | MSTRG.25388         | 6.1726810<br>09 | -<br>3.936718<br>197 | 6.60E-10 | 3.50E-07 |
| <i>NA</i>                | NA                                          | MSTRG.18723         | 47.621612<br>51 | -<br>3.191664<br>539 | 8.37E-10 | 4.31E-07 |
| <i>LINC01314</i>         | NR_120317                                   | MSTRG.11260         | 113.58313<br>77 | -<br>3.169812<br>448 | 1.03E-09 | 5.18E-07 |
| <i>MIR302A</i>           | NR_029835,NR_<br>029860,NR_029<br>857       | MSTRG.24909         | 19.506530<br>4  | -<br>3.576255<br>391 | 1.31E-09 | 6.40E-07 |
| <i>DPP6</i>              | NM_001039350,<br>NM_001290253,              | MSTRG.30380         | 138.15271<br>51 | -<br>3.365712        | 2.36E-09 | 1.13E-06 |

|           |                           |                 |             |             |          |          |
|-----------|---------------------------|-----------------|-------------|-------------|----------|----------|
|           | NM_130797,NM_001290252    |                 |             | 829         |          |          |
| NA        | NA                        | ENSG00000283196 | 9.42287253  | 3.509414336 | 2.59E-09 | 1.21E-06 |
| SYT6      | NM_001270805,NM_205848    | MSTRG.1703      | 191.7736249 | 2.90869221  | 3.69E-09 | 1.68E-06 |
| KCNC3     | NM_004977,NR_110912       | MSTRG.17365     | 57.19451148 | 2.755952423 | 5.00E-09 | 2.23E-06 |
| ANKRD20A1 | NM_032250,NM_001012419    | ENSG00000260691 | 21.18480663 | 2.633826797 | 7.87E-09 | 3.39E-06 |
| EPOP      | NM_001130677              | MSTRG.14004     | 242.6466079 | 2.012196045 | 7.96E-09 | 3.39E-06 |
| ANKRD20A3 | NM_001012419,NM_032250    | ENSG00000276203 | 25.71149774 | 2.606423395 | 1.15E-08 | 4.71E-06 |
| NA        | NA                        | MSTRG.16633     | 27.04814674 | 3.380880962 | 1.75E-08 | 7.02E-06 |
| HSPB8     | NM_014365                 | MSTRG.7976      | 187.7233515 | 2.856178563 | 3.61E-08 | 1.41E-05 |
| PAX8      | NM_013992                 | MSTRG.18882     | 52.26415284 | 2.961482637 | 3.88E-08 | 1.49E-05 |
| POU5F1P3  | NR_036440                 | MSTRG.6574      | 41.14698062 | 3.365080143 | 5.82E-08 | 2.19E-05 |
| CTSV      | NM_001201575              | MSTRG.32458     | 186.0771409 | 1.766551916 | 6.89E-08 | 2.55E-05 |
| CLDN6     | NM_021195                 | MSTRG.11794     | 164.9698683 | 2.890659312 | 9.48E-08 | 3.44E-05 |
| LINC00371 | NR_102432,NR_102431       | MSTRG.8587      | 8.416777442 | 3.393040742 | 1.09E-07 | 3.88E-05 |
| METTL7A   | NM_014033                 | MSTRG.7115      | 111.6105952 | 2.657376752 | 1.90E-07 | 6.58E-05 |
| NA        | NA                        | MSTRG.25444     | 12.85811196 | 3.196212385 | 1.91E-07 | 6.58E-05 |
| NA        | NA                        | MSTRG.24933     | 10.40229617 | 3.220075539 | 2.03E-07 | 6.85E-05 |
| VGLL3     | NM_001320494,NM_001320493 | MSTRG.22958     | 2874.524895 | 3.146944    | 2.48E-07 | 8.22E-05 |

|                          |                                                                           |                     |                 |                      |          |                 |
|--------------------------|---------------------------------------------------------------------------|---------------------|-----------------|----------------------|----------|-----------------|
|                          |                                                                           |                     |                 | 858                  |          |                 |
| <i>HOPX</i>              | NM_001145460,<br>NM_001145459                                             | MSTRG.24487         | 82.284784<br>47 | 2.993386<br>272      | 4.99E-07 | 0.000162<br>77  |
| <i>LINC00632</i>         | NR_028345, NR_<br>028344, NR_104<br>228                                   | MSTRG.34243         | 87.514426<br>58 | 2.347774<br>005      | 5.60E-07 | 0.000179<br>844 |
| <i>CMTM4</i>             | NM_178818                                                                 | MSTRG.12624         | 220.64589<br>9  | 2.473766<br>532      | 5.78E-07 | 0.000182<br>665 |
| <i>CSDC2</i>             | NM_014460                                                                 | MSTRG.21886         | 167.21857<br>98 | 1.708906<br>227      | 6.54E-07 | 0.000203<br>318 |
| <i>LOC101927<br/>286</i> | NR_120324                                                                 | MSTRG.11519         | 11.623827<br>88 | -<br>2.891089<br>463 | 6.85E-07 | 0.000209<br>586 |
| <i>NA</i>                | NA                                                                        | MSTRG.12027         | 8.2138425<br>65 | -<br>3.052593<br>339 | 8.56E-07 | 0.000254<br>165 |
| <i>MYH14</i>             | NM_001077186                                                              | MSTRG.17362         | 24.443303<br>78 | -<br>3.021748<br>808 | 8.52E-07 | 0.000254<br>165 |
| <i>ERO1B</i>             | NM_019891                                                                 | MSTRG.3079          | 123.17218<br>71 | 1.459830<br>896      | 9.51E-07 | 0.000278<br>13  |
| <i>ZNF717</i>            | NM_001324027,<br>NA, NM_001324<br>026, NM_001128<br>223, NM_001290<br>208 | MSTRG.22929         | 73.787961<br>38 | -<br>2.776674<br>986 | 1.05E-06 | 0.000303<br>598 |
| <i>HS3ST4</i>            | NM_006040, NR<br>_036146                                                  | MSTRG.12185         | 27.246292<br>83 | -<br>2.912100<br>854 | 1.14E-06 | 0.000323<br>384 |
| <i>OBSCN</i>             | NM_052843, NM<br>_001098623                                               | MSTRG.2994          | 282.26516<br>6  | 2.127361<br>521      | 1.30E-06 | 0.000363<br>487 |
| <i>TBL1Y</i>             | NM_033284                                                                 | MSTRG.34388         | 5.1111072<br>59 | 3.056803<br>969      | 1.33E-06 | 0.000367<br>572 |
| <i>INPP5D</i>            | NM_001017915                                                              | MSTRG.19987         | 264.69126<br>37 | 2.696302<br>515      | 1.38E-06 | 0.000369<br>372 |
| <i>ANKRD20A<br/>2</i>    | NM_001012421                                                              | ENSG00000183<br>148 | 18.752266<br>18 | 2.551216<br>182      | 1.36E-06 | 0.000369<br>372 |
| <i>NA</i>                | NA                                                                        | MSTRG.385           | 31.083919<br>95 | 2.491526<br>856      | 1.87E-06 | 0.000494<br>314 |
| <i>CEACAM21</i>          | NM_001288773,<br>NM_001098506                                             | MSTRG.17030         | 53.730842<br>88 | 3.013404<br>202      | 2.05E-06 | 0.000527<br>815 |
| <i>KCNK12</i>            | NM_022055                                                                 | MSTRG.18195         | 80.457292<br>92 | -<br>2.524196<br>85  | 2.04E-06 | 0.000527<br>815 |
| <i>RASGRP3</i>           | NM_170672, NM<br>_001139488, NM                                           | ENSG00000152<br>689 | 18.419681<br>07 | 2.799638<br>763      | 2.11E-06 | 0.000536<br>307 |

|               |                                                           |                     |                 |                      |          |                 |
|---------------|-----------------------------------------------------------|---------------------|-----------------|----------------------|----------|-----------------|
|               | _015376                                                   |                     |                 |                      |          |                 |
| ZBBX          | NM_001199201,<br>NM_001199202                             | MSTRG.23663         | 79.256468<br>9  | 1.476058<br>814      | 2.20E-06 | 0.000552<br>225 |
| WNT4          | NM_030761                                                 | MSTRG.477           | 239.42555<br>75 | 2.468598<br>893      | 2.42E-06 | 0.000600<br>182 |
| A2M-AS1       | NR_026971                                                 | MSTRG.6584          | 24.662721<br>6  | 2.643983<br>179      | 2.74E-06 | 0.000663<br>681 |
| NA            | NA                                                        | MSTRG.6414          | 20.293945<br>41 | -<br>2.990966<br>759 | 2.71E-06 | 0.000663<br>681 |
| LOC441666     | NR_024380                                                 | MSTRG.3552          | 66.257291<br>25 | -<br>2.852411<br>799 | 3.51E-06 | 0.000829<br>53  |
| NA            | NA                                                        | MSTRG.24588         | 12.232399<br>1  | -<br>2.379108<br>921 | 3.80E-06 | 0.000886<br>383 |
| CNTN4         | NM_175607,NM<br>_001206955,NM<br>_001206956               | MSTRG.22056         | 90.714003<br>31 | -<br>2.711683<br>581 | 3.85E-06 | 0.000887<br>637 |
| CDC42EP4      | NM_012121                                                 | MSTRG.14778         | 1382.6265<br>75 | 2.210618<br>811      | 4.11E-06 | 0.000936<br>722 |
| FAM81B        | NM_152548                                                 | MSTRG.26149         | 21.831479<br>42 | 2.501118<br>528      | 4.64E-06 | 0.001032<br>312 |
| MIR3942       | NR_037507,NM<br>_080650,NM_00<br>1141972                  | MSTRG.10433         | 373.42518<br>73 | -<br>1.310630<br>916 | 4.64E-06 | 0.001032<br>312 |
| ANKRD20A<br>4 | NM_001098805                                              | ENSG00000172<br>014 | 17.448350<br>92 | 2.310896<br>17       | 4.95E-06 | 0.001090<br>444 |
| TBL1Y         | NM_033284                                                 | MSTRG.34387         | 9.3555578<br>67 | 2.648605<br>971      | 5.30E-06 | 0.001153<br>71  |
| CYP26A1       | NM_057157,NA,<br>NM_000783                                | MSTRG.4107          | 1269.0808<br>29 | -<br>2.682076<br>722 | 5.75E-06 | 0.001224<br>399 |
| GSX2          | NM_133267                                                 | MSTRG.24454         | 22.667922<br>68 | 2.528839<br>376      | 5.73E-06 | 0.001224<br>399 |
| MIR153-2      | NR_029689,NM<br>_001308267,NM<br>_001308268,NR<br>_030325 | MSTRG.30413         | 1109.0174<br>74 | -<br>2.138541<br>789 | 6.35E-06 | 0.001336<br>545 |
| DNAJC30       | NM_032317                                                 | MSTRG.29482         | 132.39499<br>96 | -<br>2.812087<br>923 | 6.80E-06 | 0.001418<br>159 |
| CYP2R1        | NM_024514                                                 | MSTRG.4871          | 193.96921<br>23 | -<br>1.645292<br>742 | 7.49E-06 | 0.001544<br>377 |
| FST           | NM_006350                                                 | MSTRG.25739         | 817.93285       | -                    | 8.94E-06 | 0.001825        |

|                       |                                                                                              |                     |                 |                 |          |                 |
|-----------------------|----------------------------------------------------------------------------------------------|---------------------|-----------------|-----------------|----------|-----------------|
|                       |                                                                                              |                     | 46              | 1.736497<br>395 |          | 063             |
| <i>TRIM61</i>         | NM_001012414                                                                                 | MSTRG.25243         | 19.925354<br>55 | 2.574409<br>195 | 9.65E-06 | 0.001947<br>894 |
| <i>TGM3</i>           | NM_003245                                                                                    | ENSG00000125<br>780 | 7.7767569<br>52 | 2.640699<br>355 | 1.08E-05 | 0.002153<br>282 |
| <i>SSPO</i>           | NM_198455                                                                                    | MSTRG.30318         | 78.398719<br>6  | 2.110726<br>49  | 1.34E-05 | 0.002657<br>561 |
| <i>SS18L1</i>         | NM_198935                                                                                    | MSTRG.20808         | 452.31029<br>26 | 1.436523<br>6   | 1.36E-05 | 0.002660<br>585 |
| <i>SLC9A3</i>         | NM_001284351                                                                                 | MSTRG.25423         | 17.976558<br>37 | 2.403983<br>032 | 1.42E-05 | 0.002762<br>974 |
| <i>FAR2P2</i>         | NR_046258, NR_<br>103761                                                                     | MSTRG.19026         | 91.104774<br>93 | 1.574918<br>046 | 1.49E-05 | 0.002861<br>744 |
| <i>LOC403323</i>      | NR_122076, NR_<br>122077                                                                     | MSTRG.32190         | 14.143454<br>99 | 1.997224<br>939 | 1.53E-05 | 0.002912<br>318 |
| <i>MITF</i>           | NM_198159, NM_<br>_001184967, NM_<br>_006722, NM_19<br>8177, NM_00024<br>8, NM_00118496<br>8 | MSTRG.22882         | 31.831216<br>91 | 2.245212<br>141 | 1.63E-05 | 0.003069<br>158 |
| <i>PTPRG-AS1</i>      | NR_038283                                                                                    | MSTRG.22820         | 120.12583<br>91 | 1.457526<br>567 | 1.69E-05 | 0.003160<br>576 |
| <i>MOXD1</i>          | NM_015529                                                                                    | MSTRG.28430         | 1173.6661<br>61 | 2.487952<br>352 | 1.81E-05 | 0.003345<br>235 |
| <i>MYOM2</i>          | NM_003970                                                                                    | MSTRG.30461         | 114.87436<br>41 | 2.121625<br>525 | 2.00E-05 | 0.003662<br>689 |
| <i>COMT</i>           | NM_000754, NM_<br>_001135161, NM_<br>_007310, NR_03<br>9918                                  | MSTRG.21399         | 312.07381<br>77 | 1.668596<br>527 | 2.18E-05 | 0.003961<br>611 |
| <i>SBF2</i>           | NM_030962                                                                                    | MSTRG.4825          | 43.856226<br>98 | 2.057240<br>702 | 2.24E-05 | 0.003981<br>144 |
| <i>ANKRD20A<br/>3</i> | NM_001012419,<br>NR_026759, NA                                                               | ENSG00000240<br>240 | 11.327718<br>22 | 2.314515<br>263 | 2.23E-05 | 0.003981<br>144 |
| <i>NA</i>             | NA                                                                                           | MSTRG.10254         | 17.558625<br>31 | 2.274371<br>382 | 2.31E-05 | 0.004066<br>807 |
| <i>RPL23AP7</i>       | NR_024529                                                                                    | MSTRG.18888         | 187.22367<br>09 | 1.872104<br>646 | 2.33E-05 | 0.004066<br>807 |
| <i>GRIP2</i>          | NM_001080423                                                                                 | MSTRG.22199         | 77.612300<br>27 | 2.238810<br>433 | 2.36E-05 | 0.004096<br>262 |
| <i>NA</i>             | NA                                                                                           | MSTRG.33835         | 61.511018<br>34 | 2.368432<br>584 | 2.62E-05 | 0.004496<br>639 |

|                  |                                                |                 |             |             |          |             |
|------------------|------------------------------------------------|-----------------|-------------|-------------|----------|-------------|
| <i>LINC00839</i> | NR_026827                                      | ENSG00000185904 | 5.639193799 | 2.680302217 | 2.78E-05 | 0.004687263 |
| <i>TP53</i>      | NM_001276699,<br>NM_000546                     | MSTRG.13374     | 1550.054577 | 1.891705615 | 2.84E-05 | 0.004754059 |
| <i>NDUFA4L2</i>  | NM_020142                                      | MSTRG.7312      | 92.79299367 | 2.133720281 | 2.88E-05 | 0.004783152 |
| <i>DAZL</i>      | NM_001190811,<br>NM_001351,NA                  | MSTRG.22224     | 118.4645605 | 2.687520149 | 2.98E-05 | 0.004901559 |
| <i>AKIRIN2</i>   | NM_018064                                      | MSTRG.28094     | 1187.042595 | 0.813280636 | 3.02E-05 | 0.004929307 |
| <i>KIAA1644</i>  | NM_001099294                                   | MSTRG.21952     | 350.0459623 | 1.477769631 | 3.24E-05 | 0.005253266 |
| <i>WDR72</i>     | NR_102335, NR_102334, NM_182758                | ENSG00000166415 | 24.56451758 | 2.330653108 | 3.30E-05 | 0.005257417 |
| <i>ZNF467</i>    | NM_001329856                                   | MSTRG.30316     | 163.9557335 | 1.776291759 | 3.27E-05 | 0.005257417 |
| <i>NA</i>        | NA                                             | MSTRG.33080     | 33.53587957 | 2.563837506 | 3.47E-05 | 0.005483262 |
| <i>CD70</i>      | NM_001330332,<br>NM_001252                     | MSTRG.16074     | 66.74292136 | 2.491397429 | 3.86E-05 | 0.005901309 |
| <i>ISM1</i>      | NM_080826                                      | MSTRG.20256     | 43.809809   | 2.591745718 | 3.83E-05 | 0.005901309 |
| <i>NA</i>        | NA                                             | MSTRG.33151     | 177.2705922 | 2.037224827 | 3.86E-05 | 0.005901309 |
| <i>SPACA6</i>    | NR_024330, NM_001316972, NM_001316994          | MSTRG.17410     | 31.9203185  | 1.54539805  | 3.83E-05 | 0.005901309 |
| <i>HCG23</i>     | NR_044996                                      | MSTRG.27593     | 6.462256723 | 2.309811688 | 4.10E-05 | 0.006227495 |
| <i>CX3CL1</i>    | NM_002996                                      | MSTRG.12550     | 252.5794577 | 1.120290609 | 4.19E-05 | 0.006263684 |
| <i>TSIX</i>      | NR_003255                                      | MSTRG.33715     | 52.25465071 | 2.579581322 | 4.17E-05 | 0.006263684 |
| <i>GNAS-AS1</i>  | NR_002785                                      | MSTRG.20782     | 17.09223947 | 2.368237522 | 4.22E-05 | 0.006267226 |
| <i>THNSL2</i>    | NM_001244676,<br>NM_018271                     | ENSG00000144115 | 39.67897313 | 2.251926382 | 4.33E-05 | 0.006384962 |
| <i>FBXO46</i>    | NM_001080469,<br>NM_001329632,<br>NM_001329634 | MSTRG.17156     | 168.7118967 | 2.421952617 | 4.47E-05 | 0.006536518 |

|                 |                                                |                     |                 |                 |          |                 |
|-----------------|------------------------------------------------|---------------------|-----------------|-----------------|----------|-----------------|
| <i>OAF</i>      | NM_178507                                      | MSTRG.6206          | 356.91770<br>17 | 1.857512<br>731 | 4.81E-05 | 0.006986<br>243 |
| <i>PTCD2</i>    | NM_001284403                                   | MSTRG.25942         | 183.55889<br>73 | 1.300201<br>147 | 4.96E-05 | 0.007091<br>238 |
| <i>NA</i>       | NA                                             | MSTRG.16117         | 116.10069<br>66 | 1.501130<br>936 | 4.94E-05 | 0.007091<br>238 |
| <i>NA</i>       | NA                                             | MSTRG.6821          | 284.45590<br>96 | 1.152544<br>098 | 5.05E-05 | 0.007167<br>272 |
| <i>OR2AE1</i>   | NM_001005276,<br>NM_033017                     | MSTRG.29745         | 429.46709<br>91 | 1.271756<br>321 | 5.22E-05 | 0.007353<br>106 |
| <i>NA</i>       | NA                                             | MSTRG.20414         | 13.392795<br>43 | 2.222701<br>452 | 5.30E-05 | 0.007418<br>18  |
| <i>MUC19</i>    | NM_173600                                      | ENSG00000205<br>592 | 5.2131945<br>24 | 2.520130<br>174 | 5.47E-05 | 0.007597<br>725 |
| <i>TSPAN11</i>  | NM_001080509,<br>NA                            | MSTRG.6865          | 341.64674<br>08 | 2.019516<br>022 | 5.58E-05 | 0.007694<br>394 |
| <i>INSC</i>     | NM_001031853,<br>NM_001042536,<br>NM_001278313 | MSTRG.4875          | 13.358903<br>18 | 2.584073<br>319 | 5.85E-05 | 0.008009<br>151 |
| <i>MAP3K8</i>   | NM_001244134,<br>NM_001320961                  | MSTRG.3474          | 125.13952<br>12 | 1.260285<br>079 | 5.89E-05 | 0.008014<br>926 |
| <i>NA</i>       | NA                                             | MSTRG.24714         | 37.573267<br>32 | 2.369600<br>357 | 5.98E-05 | 0.008077<br>345 |
| <i>CFAP100</i>  | NM_182628                                      | ENSG00000163<br>885 | 6.1404193<br>38 | 2.495132<br>595 | 6.10E-05 | 0.008183<br>544 |
| <i>PLA2G2A</i>  | NM_001161729,<br>NM_000300                     | MSTRG.438           | 16.157922<br>1  | 2.564032<br>702 | 6.23E-05 | 0.008250<br>658 |
| <i>FAM86C2P</i> | NR_024249                                      | MSTRG.5558          | 44.886540<br>47 | 2.203900<br>031 | 6.22E-05 | 0.008250<br>658 |
| <i>ARHGEF4</i>  | NM_015320,NM<br>_032995                        | MSTRG.19032         | 464.33409<br>02 | 1.640591<br>808 | 6.48E-05 | 0.008517<br>169 |
| <i>DDB2</i>     | NM_000107                                      | MSTRG.5173          | 450.33832<br>24 | 1.323245<br>827 | 6.70E-05 | 0.008744<br>295 |
| <i>CXCL2</i>    | NM_002089                                      | MSTRG.24561         | 18.386594<br>44 | 2.355756<br>174 | 6.80E-05 | 0.008757<br>635 |
| <i>NA</i>       | NA,NR_144378,<br>NR_002791                     | MSTRG.4396          | 26.165699<br>8  | 2.562538<br>893 | 6.88E-05 | 0.008813<br>392 |
| <i>CDKL5</i>    | NM_003159,NM<br>_001037343,NM<br>_001323289    | MSTRG.33273         | 200.77893<br>27 | 1.603073<br>929 | 7.09E-05 | 0.009023<br>086 |
| <i>ARPP19</i>   | NM_001306195,<br>NM_001306191,<br>NM_001330309 | MSTRG.10777         | 3224.4400<br>03 | 2.186526<br>541 | 7.33E-05 | 0.009199<br>125 |
| <i>UBIAD1</i>   | NM_013319,NM                                   | MSTRG.284           | 396.08572       | -               | 7.86E-05 | 0.009803        |

|  |            |  |    |                 |  |     |
|--|------------|--|----|-----------------|--|-----|
|  | _001330349 |  | 43 | 0.830725<br>967 |  | 326 |
|--|------------|--|----|-----------------|--|-----|

**B. 77 patient vs 78 control hiPSC-PCS**

| Gene Symbol         | All Refseq Transcripts | Sequencing Gene ID | Mean Counts     | Log2 Fold Change | P-value  | BH adjusted p-value |
|---------------------|------------------------|--------------------|-----------------|------------------|----------|---------------------|
| NA                  | NA                     | MSTRG.19362        | 1366.9304<br>13 | -<br>8.976799344 | 9.07E-90 | 1.13E-85            |
| <i>ACTG1P20</i>     | NR_033926              | MSTRG.598          | 356.20841<br>32 | -<br>6.889188017 | 1.61E-81 | 1.34E-77            |
| <i>TTY15</i>        | NR_001545              | MSTRG.34406        | 176.70392<br>95 | -<br>6.785755891 | 4.47E-38 | 1.39E-34            |
| <i>MTRNR2L1</i>     | NM_001190452           | MSTRG.13690        | 48.980536<br>54 | -<br>6.985600696 | 4.93E-34 | 1.23E-30            |
| <i>TMED7</i>        | NM_181836              | MSTRG.26307        | 49.816979<br>51 | -<br>6.228516322 | 1.01E-31 | 2.30E-28            |
| NA                  | NA                     | MSTRG.28405        | 76.742582<br>57 | -<br>5.639918742 | 5.70E-26 | 1.18E-22            |
| <i>XIST</i>         | NR_001564              | MSTRG.33716        | 423.24375<br>78 | -<br>4.916248501 | 1.28E-16 | 2.13E-13            |
| NA                  | NA                     | MSTRG.1457         | 241.86775<br>2  | -<br>4.993924513 | 4.31E-16 | 6.72E-13            |
| NA                  | NA                     | MSTRG.33036        | 74.340403<br>11 | -<br>4.382356518 | 2.37E-15 | 3.28E-12            |
| <i>LOC654342</i>    | NR_027238              | MSTRG.18656        | 258.61358<br>5  | -<br>2.461757218 | 3.89E-14 | 5.10E-11            |
| NA                  | NA                     | MSTRG.26500        | 165.54954<br>56 | -<br>3.274948261 | 3.00E-13 | 3.74E-10            |
| <i>PPM1E</i>        | NM_014906              | MSTRG.14543        | 895.63678<br>83 | -<br>1.965886178 | 1.46E-11 | 1.74E-08            |
| <i>LOC100506797</i> | NR_144530              | MSTRG.18904        | 12.081679<br>74 | -<br>3.818368382 | 3.13E-11 | 3.55E-08            |
| NA                  | NA                     | MSTRG.27417        | 11.552857<br>97 | -<br>3.923827848 | 5.73E-11 | 6.21E-08            |
| <i>FRG1CP</i>       | NR_132315,NA           | MSTRG.20413        | 504.88628<br>69 | -<br>-2.48187704 | 1.39E-10 | 1.44E-07            |
| <i>TMSB4Y</i>       | NM_004202              | MSTRG.34411        | 16.406998<br>41 | -<br>3.737358144 | 2.92E-09 | 2.80E-06            |
| <i>LOC646214</i>    | NR_027053              | MSTRG.10183        | 14.992869<br>57 | -<br>3.194006904 | 1.12E-08 | 1.03E-05            |
| <i>TEKT4P2</i>      | NR_038327              | MSTRG.20913        | 34.080321<br>2  | -<br>3.119195309 | 6.82E-08 | 6.08E-05            |
| <i>RNASEL</i>       | NM_021133              | MSTRG.2491         | 92.674726<br>65 | -<br>1.956092584 | 1.31E-07 | 0.000112<br>763     |
| <i>CDC42EP4</i>     | NM_012121              | MSTRG.14778        | 1382.6265       | -<br>2.28E-07    | 2.28E-07 | 0.000189            |



|                  |                                                                               |                     |                 |                  |          |                 |
|------------------|-------------------------------------------------------------------------------|---------------------|-----------------|------------------|----------|-----------------|
|                  |                                                                               |                     | 75              | 2.485232918      |          | 406             |
| <i>LINC00115</i> | NR_024321                                                                     | MSTRG.56            | 11.410161<br>25 | -<br>3.169519774 | 3.74E-07 | 0.000300<br>756 |
| <i>NA</i>        | NA                                                                            | MSTRG.12388         | 12.529070<br>17 | -<br>3.169849748 | 5.85E-07 | 0.000455<br>649 |
| <i>NA</i>        | NA                                                                            | ENSG00000283<br>196 | 9.4228725<br>3  | -<br>2.931701763 | 6.76E-07 | 0.000511<br>259 |
| <i>AK3</i>       | NM_001199855,<br>NM_001199853                                                 | MSTRG.31803         | 1336.1635<br>7  | -1.45848511      | 7.22E-07 | 0.000529<br>562 |
| <i>NA</i>        | NA                                                                            | MSTRG.34423         | 3.5130262<br>94 | -<br>3.142641981 | 7.72E-07 | 0.000550<br>219 |
| <i>ZP3</i>       | NM_007155,NM<br>_001110354                                                    | MSTRG.29546         | 39.267661<br>04 | -<br>1.867350845 | 8.72E-07 | 0.000603<br>782 |
| <i>CRYBB2</i>    | NM_000496                                                                     | MSTRG.21529         | 18.363687<br>02 | -2.22634683      | 1.92E-06 | 0.001275<br>375 |
| <i>SYAP1</i>     | NM_032796                                                                     | MSTRG.33254         | 1533.6242<br>96 | 1.638880929      | 1.94E-06 | 0.001275<br>375 |
| <i>ZRSR2</i>     | NM_005089                                                                     | MSTRG.33240         | 255.94107<br>81 | 1.216383728      | 2.77E-06 | 0.001771<br>022 |
| <i>FAM157C</i>   | NR_126161                                                                     | MSTRG.13117         | 6.9131198<br>02 | -<br>2.872817371 | 3.48E-06 | 0.002119<br>744 |
| <i>NA</i>        | NA                                                                            | ENSG00000260<br>633 | 5.0257107<br>68 | -<br>2.953792614 | 3.96E-06 | 0.002352<br>281 |
| <i>ATG4A</i>     | NM_001321290                                                                  | MSTRG.33981         | 185.48443<br>45 | 1.911129732      | 4.55E-06 | 0.002636<br>33  |
| <i>ZNF587B</i>   | NM_001204818                                                                  | MSTRG.17668         | 4.9382468<br>16 | 2.909242926      | 5.03E-06 | 0.002851<br>531 |
| <i>TBL1Y</i>     | NM_033284                                                                     | MSTRG.34388         | 5.1111072<br>59 | -<br>2.881869838 | 5.46E-06 | 0.003026<br>567 |
| <i>MIR1270</i>   | NR_036053,NR_<br>036455                                                       | MSTRG.16576         | 122.64627<br>55 | 2.004406303      | 5.71E-06 | 0.003097<br>301 |
| <i>TXLNG</i>     | NM_001168683                                                                  | MSTRG.33258         | 809.11153<br>77 | 1.172692841      | 6.16E-06 | 0.003236<br>793 |
| <i>NA</i>        | NA                                                                            | MSTRG.24565         | 25.195208<br>5  | 2.351034375      | 6.23E-06 | 0.003236<br>793 |
| <i>EIF3C</i>     | NM_001199142,<br>NM_001037808,<br>NR_107058,NM<br>_001317857,NM<br>_001287251 | MSTRG.12221         | 3240.7466<br>36 | -<br>0.607394366 | 8.44E-06 | 0.004294<br>41  |
| <i>ACOT8</i>     | NM_005469                                                                     | MSTRG.20662         | 215.15724<br>21 | 1.492911901      | 1.46E-05 | 0.007219<br>474 |
| <i>FRG1BP</i>    | NR_003579                                                                     | MSTRG.20423         | 488.33075<br>25 | -<br>1.472464672 | 1.48E-05 | 0.007219<br>474 |
| <i>ULBP2</i>     | NM_025217                                                                     | MSTRG.28595         | 38.876670<br>01 | 2.505588789      | 1.72E-05 | 0.008235<br>006 |

C. 77 null vs 78 control hiPSC-PCS

| Gene Symbol | All Refseq Transcripts                                                        | Sequencing Gene ID | Mean Counts     | Log2 Fold Change | P-value  | BH adjusted p-value |
|-------------|-------------------------------------------------------------------------------|--------------------|-----------------|------------------|----------|---------------------|
| NA          | NA                                                                            | MSTRG.19362        | 1366.9304<br>13 | -<br>8.811147521 | 2.45E-85 | 2.18E-81            |
| ACTG1P20    | NR_033926                                                                     | MSTRG.598          | 356.20841<br>32 | -<br>7.250431153 | 7.56E-80 | 4.48E-76            |
| CHCHD2      | NM_001320327                                                                  | MSTRG.29335        | 3594.2341<br>59 | -<br>7.257042517 | 1.37E-62 | 4.88E-59            |
| TTY15       | NR_001545                                                                     | MSTRG.34406        | 176.70392<br>95 | -<br>6.475377482 | 2.84E-35 | 5.05E-32            |
| MTRNR2L1    | NM_001190452                                                                  | MSTRG.13690        | 48.980536<br>54 | -<br>6.643157289 | 2.87E-31 | 4.26E-28            |
| TMED7       | NM_181836                                                                     | MSTRG.26307        | 49.816979<br>51 | -<br>6.094942915 | 5.33E-30 | 7.29E-27            |
| NA          | NA                                                                            | MSTRG.28405        | 76.742582<br>57 | -<br>5.695798065 | 1.97E-26 | 2.34E-23            |
| ZNF667-AS1  | NR_036521,NR_036522                                                           | MSTRG.17587        | 151.48663<br>69 | -<br>5.152618833 | 1.46E-22 | 1.62E-19            |
| CRYBB1      | NM_001887                                                                     | MSTRG.21555        | 61.372602<br>94 | -<br>5.093563394 | 1.98E-19 | 2.07E-16            |
| NA          | NA                                                                            | MSTRG.1457         | 241.86775<br>2  | -<br>5.402032627 | 1.93E-18 | 1.80E-15            |
| PMEL        | NM_001200053,<br>NM_006928                                                    | MSTRG.7256         | 2796.8039<br>61 | -<br>4.197686752 | 7.14E-16 | 6.04E-13            |
| NA          | NA                                                                            | MSTRG.33036        | 74.340403<br>11 | -<br>4.255839094 | 2.01E-14 | 1.56E-11            |
| GANC        | NM_001301410,<br>NM_001301409,<br>NM_198141,NM_000070,NM_173088,<br>NM_173090 | MSTRG.10569        | 301.54875<br>97 | -<br>1.7948269   | 4.26E-14 | 3.16E-11            |
| VAX2        | NM_012476                                                                     | MSTRG.18442        | 64.614206<br>1  | -<br>3.546306618 | 6.57E-14 | 4.67E-11            |
| CREBRF      | NM_001168393,<br>NM_153607                                                    | MSTRG.26951        | 465.98578<br>73 | -<br>-2.18153422 | 2.03E-12 | 1.34E-09            |
| NA          | NA                                                                            | MSTRG.27417        | 11.552857<br>97 | -<br>4.1299249   | 5.45E-12 | 3.46E-09            |
| APOO        | NM_024122                                                                     | MSTRG.33307        | 756.62709<br>25 | -<br>2.036945045 | 9.89E-12 | 6.06E-09            |
| NA          | NA                                                                            | MSTRG.24565        | 25.195208<br>5  | -<br>3.469211269 | 1.70E-11 | 1.01E-08            |
| NUAK2       | NM_030952                                                                     | MSTRG.2714         | 802.17916       | -                | 2.47E-11 | 1.42E-08            |

|                |                               |             |                 |                  |          |          |
|----------------|-------------------------------|-------------|-----------------|------------------|----------|----------|
|                |                               |             | 2               | 1.938539929      |          |          |
| <i>PTGDS</i>   | NM_000954,NM_207510           | MSTRG.32997 | 157.39203<br>92 | 2.653516863      | 3.84E-11 | 2.13E-08 |
| <i>RNASEL</i>  | NM_021133                     | MSTRG.2491  | 92.674726<br>65 | 2.401957354      | 8.31E-11 | 4.48E-08 |
| <i>FAM26E</i>  | NM_153711                     | MSTRG.28319 | 104.82375<br>8  | 2.716660131      | 1.66E-10 | 8.70E-08 |
| <i>NA</i>      | NA                            | MSTRG.30415 | 69.970820<br>4  | -<br>3.155285795 | 3.29E-10 | 1.67E-07 |
| <i>NA</i>      | NA                            | MSTRG.33141 | 31.618970<br>27 | -<br>3.138035751 | 4.25E-10 | 2.10E-07 |
| <i>MIR1270</i> | NR_036053,NR_036455           | MSTRG.16576 | 122.64627<br>55 | 2.729568153      | 5.60E-10 | 2.69E-07 |
| <i>SLC2A6</i>  | NM_017585                     | MSTRG.32934 | 166.67758<br>57 | 1.561026498      | 8.02E-10 | 3.66E-07 |
| <i>CA11</i>    | NR_136241                     | MSTRG.17273 | 529.11890<br>77 | 1.48661458       | 7.97E-10 | 3.66E-07 |
| <i>C18orf8</i> | NM_001276342,<br>NM_001318707 | MSTRG.15356 | 900.42751<br>6  | 2.469601749      | 8.77E-10 | 3.90E-07 |
| <i>RENBP</i>   | NM_002910                     | MSTRG.34323 | 274.69113<br>45 | 1.683926747      | 1.29E-09 | 5.60E-07 |
| <i>NA</i>      | NA                            | MSTRG.12388 | 12.529070<br>17 | -<br>3.819480011 | 2.07E-09 | 8.55E-07 |
| <i>LHFPL3</i>  | NM_199000                     | MSTRG.29871 | 343.26154<br>99 | -<br>1.574976474 | 3.80E-09 | 1.54E-06 |
| <i>NA</i>      | NA                            | MSTRG.26500 | 165.54954<br>56 | -<br>2.616313615 | 4.01E-09 | 1.57E-06 |
| <i>PTRH1</i>   | NM_001002913,<br>NA           | MSTRG.32778 | 97.722659<br>81 | 1.890008189      | 4.05E-09 | 1.57E-06 |
| <i>SCRG1</i>   | NM_007281                     | MSTRG.25305 | 330.46595<br>61 | 2.394776219      | 4.27E-09 | 1.61E-06 |
| <i>ACOT8</i>   | NM_005469                     | MSTRG.20662 | 215.15724<br>21 | 2.016152543      | 4.48E-09 | 1.66E-06 |
| <i>ACAT1</i>   | NM_000019                     | MSTRG.6044  | 957.09939<br>37 | 1.465003319      | 5.74E-09 | 2.04E-06 |
| <i>ZNF12</i>   | NM_006956                     | MSTRG.28914 | 1013.7686<br>39 | -<br>1.130436488 | 5.66E-09 | 2.04E-06 |
| <i>TMSB4Y</i>  | NM_004202                     | MSTRG.34411 | 16.406998<br>41 | -<br>3.656706039 | 6.59E-09 | 2.30E-06 |
| <i>KHK</i>     | NM_006488                     | MSTRG.17954 | 160.25955<br>08 | 1.965006507      | 7.36E-09 | 2.52E-06 |
| <i>FIBP</i>    | NM_198897                     | MSTRG.5467  | 1350.7425<br>31 | 1.460412658      | 7.93E-09 | 2.66E-06 |
| <i>OTOGL</i>   | NM_173591                     | MSTRG.7545  | 93.249024<br>57 | 3.400132762      | 8.62E-09 | 2.84E-06 |
| <i>CPVL</i>    | NM_019029,NM                  | MSTRG.29100 | 369.34427       | 2.353516671      | 1.16E-08 | 3.75E-06 |

|                  |                                                                          |             |                 |                  |          |          |
|------------------|--------------------------------------------------------------------------|-------------|-----------------|------------------|----------|----------|
|                  | _001348052                                                               |             | 53              |                  |          |          |
| <i>CCP110</i>    | NM_001199022                                                             | MSTRG.12090 | 978.38844<br>51 | -<br>1.335022832 | 1.28E-08 | 4.07E-06 |
| <i>UCHL3</i>     | NM_001270952,<br>NM_005358,NM_006002,NM_001306080,NM_001330583,NM_015842 | MSTRG.8689  | 535.60816<br>43 | 1.368845567      | 1.43E-08 | 4.47E-06 |
| <i>TSR3</i>      | NM_001001410                                                             | MSTRG.11668 | 809.62788<br>43 | 1.660658388      | 1.60E-08 | 4.90E-06 |
| <i>BCYRN1</i>    | NR_001568                                                                | MSTRG.18181 | 104.04858<br>7  | 3.374868404      | 1.95E-08 | 5.86E-06 |
| <i>REREP3</i>    | NR_033735                                                                | MSTRG.10187 | 34.147352<br>14 | -<br>2.047331278 | 2.03E-08 | 6.02E-06 |
| <i>COMMD4</i>    | NM_001284377,<br>NM_001284379,<br>NR_104312                              | MSTRG.11149 | 842.09747<br>95 | 1.432760453      | 2.60E-08 | 7.59E-06 |
| <i>LOC646214</i> | NR_027053                                                                | MSTRG.10183 | 14.992869<br>57 | 3.10974815       | 2.97E-08 | 8.51E-06 |
| <i>PTPRZ1</i>    | NM_002851                                                                | MSTRG.30008 | 6204.3479<br>26 | -<br>1.665645799 | 3.96E-08 | 1.10E-05 |
| <i>ZBTB44</i>    | NM_001301098                                                             | MSTRG.6349  | 499.88959<br>56 | -<br>1.276748266 | 3.95E-08 | 1.10E-05 |
| <i>SLC25A18</i>  | NM_001303484                                                             | MSTRG.21339 | 61.177205<br>6  | 1.789616272      | 4.58E-08 | 1.25E-05 |
| <i>VEZF1</i>     | NM_007146,NM_001330393                                                   | MSTRG.14503 | 1045.6149<br>35 | -<br>1.424576494 | 5.06E-08 | 1.36E-05 |
| <i>NA</i>        | NA                                                                       | MSTRG.33143 | 62.887674<br>72 | -<br>2.364654211 | 5.52E-08 | 1.46E-05 |
| <i>NA</i>        | NA                                                                       | MSTRG.25417 | 51.900475<br>46 | 2.250717195      | 5.70E-08 | 1.49E-05 |
| <i>SLC46A3</i>   | NM_181785                                                                | MSTRG.8382  | 38.030350<br>31 | 2.082002634      | 7.27E-08 | 1.82E-05 |
| <i>LRRC75A</i>   | NM_001113567                                                             | MSTRG.13535 | 164.74068<br>38 | -2.07820506      | 7.17E-08 | 1.82E-05 |
| <i>SNRNP48</i>   | NM_152551                                                                | MSTRG.27183 | 494.43626<br>69 | -2.09832283      | 7.13E-08 | 1.82E-05 |
| <i>COPRS</i>     | NM_018405,NM_001330176                                                   | MSTRG.13817 | 1067.5542<br>27 | 1.713370514      | 7.70E-08 | 1.90E-05 |
| <i>EIF5A</i>     | NM_001143760,<br>NM_001970,NM_001143761,NM_001143762                     | MSTRG.13358 | 3067.0017<br>62 | 1.517409636      | 9.48E-08 | 2.25E-05 |
| <i>LRIG2</i>     | NM_001312686                                                             | MSTRG.1682  | 542.60938<br>15 | -<br>1.521256831 | 9.70E-08 | 2.27E-05 |

|                |                                                                                                                                                 |             |                 |                  |          |          |
|----------------|-------------------------------------------------------------------------------------------------------------------------------------------------|-------------|-----------------|------------------|----------|----------|
| <i>SEC14L5</i> | NM_014692,NR_038913,NM_019109,NM_001330504                                                                                                      | MSTRG.11894 | 284.51259<br>22 | 0.975114808      | 1.21E-07 | 2.79E-05 |
| <i>ATP5G1</i>  | NM_001002027                                                                                                                                    | MSTRG.14381 | 1299.2178<br>41 | 1.754701564      | 1.43E-07 | 3.26E-05 |
| <i>ZP3</i>     | NM_007155,NM_001110354                                                                                                                          | MSTRG.29546 | 39.267661<br>04 | -<br>2.025996899 | 1.57E-07 | 3.54E-05 |
| <i>SNX32</i>   | NM_152760                                                                                                                                       | MSTRG.5462  | 81.978521<br>39 | 1.336768594      | 1.61E-07 | 3.58E-05 |
| <i>MINOS1</i>  | NM_001032363,<br>NM_001204088,<br>NR_077246,NM_001278164,<br>NM_001278165,NM_001204084,<br>NM_005380,NM_001204085,<br>NM_001204086,NM_001278166 | MSTRG.444   | 996.28316<br>34 | 1.457559702      | 1.64E-07 | 3.60E-05 |
| <i>STAG2</i>   | NM_001042749,<br>NM_006603,NM_001282418                                                                                                         | MSTRG.34103 | 2396.5412<br>38 | -<br>1.112797584 | 1.79E-07 | 3.89E-05 |
| <i>EID2B</i>   | NM_152361                                                                                                                                       | MSTRG.16950 | 94.554949<br>38 | 3.243322218      | 1.86E-07 | 3.98E-05 |
| <i>MRAS</i>    | NM_001252091,<br>NM_001252093,<br>NM_001252090                                                                                                  | MSTRG.23406 | 225.11281<br>14 | 2.41583464       | 1.97E-07 | 4.17E-05 |
| <i>TRPC4AP</i> | NM_015638                                                                                                                                       | MSTRG.20515 | 2160.4087<br>81 | 0.723317696      | 2.03E-07 | 4.25E-05 |
| <i>PRPF3</i>   | NM_004698                                                                                                                                       | MSTRG.1945  | 767.56494<br>66 | -<br>1.039773101 | 2.06E-07 | 4.27E-05 |
| <i>PIM1</i>    | NM_001243186                                                                                                                                    | MSTRG.27709 | 768.32407<br>15 | -2.08224294      | 2.14E-07 | 4.32E-05 |
| <i>C3orf14</i> | NM_001291941,<br>NM_001291943,<br>NM_020685                                                                                                     | MSTRG.22821 | 339.48453<br>31 | 1.959560067      | 2.27E-07 | 4.52E-05 |
| <i>NA</i>      | NA,NR_049748                                                                                                                                    | MSTRG.11350 | 196.14535<br>74 | -<br>1.604150956 | 2.28E-07 | 4.52E-05 |
| <i>TEKT4P2</i> | NR_038327                                                                                                                                       | MSTRG.20913 | 34.080321<br>2  | -<br>2.999901345 | 2.41E-07 | 4.68E-05 |
| <i>BEND3P3</i> | NR_027512                                                                                                                                       | MSTRG.3980  | 34.661549<br>92 | -<br>2.175757326 | 2.42E-07 | 4.68E-05 |
| <i>PMP2</i>    | NM_002677                                                                                                                                       | MSTRG.31207 | 39.380868<br>89 | 2.973873484      | 2.53E-07 | 4.82E-05 |
| <i>BBS9</i>    | NM_001348036,                                                                                                                                   | MSTRG.29163 | 522.92673       | 1.143323301      | 2.55E-07 | 4.82E-05 |

|                  |                                                      |                 |                 |                  |          |                |
|------------------|------------------------------------------------------|-----------------|-----------------|------------------|----------|----------------|
|                  | NM_198428,NM_001348041                               |                 | 68              |                  |          |                |
| <i>PIBF1</i>     | NM_006346                                            | MSTRG.8682      | 396.65185<br>35 | -1.63250592      | 2.66E-07 | 4.98E-05       |
| <i>ACP5</i>      | NM_001111035,<br>NM_001611,NM_001322023,NM_001111034 | MSTRG.16243     | 26.466023<br>96 | 3.053751884      | 2.75E-07 | 5.10E-05       |
| <i>ANKRD20A3</i> | NM_001012419,<br>NM_032250                           | ENSG00000276203 | 25.711497<br>74 | -<br>2.334695467 | 3.20E-07 | 5.88E-05       |
| <i>USP11</i>     | NM_004651                                            | MSTRG.33464     | 5662.1752<br>46 | 0.818768447      | 3.29E-07 | 5.97E-05       |
| <i>PSPH</i>      | NM_004577                                            | MSTRG.29345     | 649.26364<br>19 | 1.541689444      | 3.42E-07 | 6.09E-05       |
| <i>MYO3A</i>     | NM_017433                                            | MSTRG.3436      | 68.090462<br>17 | -<br>2.027148364 | 3.39E-07 | 6.09E-05       |
| <i>MIR5692C2</i> | NR_049868,NR_002822                                  | MSTRG.29710     | 97.564577<br>26 | 1.699105025      | 3.57E-07 | 6.28E-05       |
| <i>ANKRD20A1</i> | NM_032250,NM_001012419                               | ENSG00000260691 | 21.184806<br>63 | -<br>2.288936487 | 3.63E-07 | 6.34E-05       |
| <i>SNTA1</i>     | NM_003098                                            | MSTRG.20467     | 259.48898<br>42 | 1.124418162      | 4.22E-07 | 7.29E-05       |
| <i>GOLGA2P7</i>  | NR_027001                                            | MSTRG.11327     | 891.33284<br>42 | -<br>1.658435391 | 4.46E-07 | 7.58E-05       |
| <i>NAXE</i>      | NM_144772                                            | MSTRG.2168      | 1062.7250<br>07 | 1.638502501      | 4.48E-07 | 7.58E-05       |
| <i>AP1S2</i>     | NM_001272071                                         | MSTRG.33247     | 2221.6800<br>74 | 1.731292427      | 4.82E-07 | 8.09E-05       |
| <i>PKD2</i>      | NM_001199898,<br>NM_001199900,<br>NM_001199899       | MSTRG.14423     | 626.87553<br>76 | 1.006666199      | 4.93E-07 | 8.11E-05       |
| <i>TRIM61</i>    | NM_001012414                                         | MSTRG.25243     | 19.925354<br>55 | -<br>3.007608444 | 4.92E-07 | 8.11E-05       |
| <i>CRYBA4</i>    | NM_001886                                            | MSTRG.21556     | 28.316975<br>93 | 3.127260765      | 5.33E-07 | 8.70E-05       |
| <i>CUZD1</i>     | NM_022034,NM_001204364                               | MSTRG.4447      | 40.484740<br>9  | 2.635445145      | 5.72E-07 | 9.16E-05       |
| <i>PUDP</i>      | NM_001178136,<br>NM_001178135                        | MSTRG.33184     | 930.41686<br>76 | 1.630334164      | 6.00E-07 | 9.54E-05       |
| <i>NA</i>        | NA                                                   | MSTRG.16150     | 113.83775<br>12 | -<br>3.074522041 | 6.18E-07 | 9.66E-05       |
| <i>RESP18</i>    | NM_001007089                                         | MSTRG.19853     | 14.245147<br>37 | 3.022229641      | 6.19E-07 | 9.66E-05       |
| <i>ARID4A</i>    | NM_002892                                            | MSTRG.9510      | 416.01480<br>87 | -<br>1.570970806 | 7.14E-07 | 0.000110<br>41 |

|                 |                                                |             |                 |             |          |                 |
|-----------------|------------------------------------------------|-------------|-----------------|-------------|----------|-----------------|
| <i>ASPHD1</i>   | NM_181718                                      | MSTRG.12266 | 102.68870<br>48 | 2.39555047  | 7.32E-07 | 0.000110<br>779 |
| <i>RANGRF</i>   | NM_001330127,<br>NM_001177801                  | MSTRG.13412 | 356.61605<br>47 | 1.394968522 | 7.35E-07 | 0.000110<br>779 |
| <i>NA</i>       | NA                                             | MSTRG.21323 | 66.492020<br>04 | 1.735405529 | 7.32E-07 | 0.000110<br>779 |
| <i>ASNS</i>     | NM_001178076,<br>NM_133436,NA                  | MSTRG.29716 | 4898.0032<br>15 | 1.724692151 | 7.48E-07 | 0.000111<br>868 |
| <i>PAPPA2</i>   | NM_021936,NM<br>_020318                        | MSTRG.2425  | 173.06800<br>96 | 3.010922139 | 7.88E-07 | 0.000116<br>833 |
| <i>EIF4B</i>    | NM_001300821                                   | MSTRG.7161  | 11126.020<br>71 | 1.417929277 | 9.19E-07 | 0.000135<br>017 |
| <i>HPS1</i>     | NM_001322477,<br>NM_001322490,<br>NR_039833    | MSTRG.4177  | 462.05946<br>92 | 1.301835898 | 9.78E-07 | 0.000142<br>519 |
| <i>SLC31A2</i>  | NM_001860                                      | MSTRG.32622 | 13.806586<br>58 | 2.702531624 | 1.02E-06 | 0.000146<br>68  |
| <i>SYNGR2</i>   | NM_001320523                                   | MSTRG.14909 | 386.51748<br>06 | 1.493421043 | 1.02E-06 | 0.000146<br>68  |
| <i>UCHL1</i>    | NM_004181                                      | MSTRG.24362 | 3994.0011<br>08 | 1.92196782  | 1.12E-06 | 0.000158<br>809 |
| <i>MTCH2</i>    | NM_001317231                                   | MSTRG.5186  | 3370.9055<br>69 | 1.171083302 | 1.15E-06 | 0.000162<br>629 |
| <i>PEPD</i>     | NM_000285                                      | MSTRG.16746 | 1087.0231<br>67 | 1.470206024 | 1.33E-06 | 0.000182<br>728 |
| <i>FAM45BP</i>  | NR_027141                                      | MSTRG.34130 | 49.185361<br>96 | 1.815526238 | 1.32E-06 | 0.000182<br>728 |
| <i>TMEM255B</i> | NM_182614,NR<br>_044995                        | MSTRG.8919  | 20.709538<br>77 | 2.451151451 | 1.32E-06 | 0.000182<br>728 |
| <i>ACAD10</i>   | NM_001136538,<br>NM_001204889,<br>NR_106819,NA | MSTRG.7891  | 1741.1060<br>84 | 0.985254017 | 1.35E-06 | 0.000184<br>071 |
| <i>TMEM150A</i> | NM_001031738                                   | MSTRG.18605 | 187.84924<br>05 | 1.166546328 | 1.37E-06 | 0.000185<br>61  |
| <i>RIT2</i>     | NM_001272077                                   | MSTRG.15494 | 33.048553<br>74 | 3.069628166 | 1.40E-06 | 0.000188<br>191 |
| <i>TSTA3</i>    | NM_001317783,<br>NM_003313                     | MSTRG.31673 | 504.55293<br>22 | 1.196839971 | 1.41E-06 | 0.000188<br>883 |
| <i>AKR1C1</i>   | NM_001353                                      | MSTRG.3238  | 524.15290<br>15 | 2.348341812 | 1.49E-06 | 0.000198<br>386 |
| <i>NA</i>       | NA                                             | MSTRG.24503 | 9.5044290<br>34 | 3.004464724 | 1.56E-06 | 0.000205<br>616 |
| <i>HSD17B10</i> | NM_004493                                      | MSTRG.33570 | 1285.4016<br>21 | 1.321326548 | 1.73E-06 | 0.000225<br>595 |
| <i>MRPL41</i>   | NM_032477                                      | MSTRG.33026 | 1145.5694<br>5  | 1.633731883 | 1.74E-06 | 0.000226<br>495 |

|                  |                                        |                 |                 |                  |          |                 |
|------------------|----------------------------------------|-----------------|-----------------|------------------|----------|-----------------|
| <i>KRIT1</i>     | NM_194455,NM_004912,NR_031616          | MSTRG.29656     | 571.09671<br>42 | -<br>1.255657188 | 1.84E-06 | 0.000237<br>389 |
| <i>GSTP1</i>     | NM_000852                              | MSTRG.5550      | 7277.3768<br>67 | 1.284741773      | 1.96E-06 | 0.000251<br>403 |
| <i>ANKRD20A3</i> | NM_001012419,NR_026759,NA              | ENSG00000240240 | 11.327718<br>22 | -<br>2.680417151 | 2.00E-06 | 0.000254<br>451 |
| <i>PRMT7</i>     | NM_001184824,NM_001290018              | MSTRG.12722     | 621.82861<br>52 | 1.2256663        | 2.06E-06 | 0.000259<br>944 |
| <i>LCA5</i>      | NM_181714                              | MSTRG.28035     | 311.24527<br>44 | -<br>1.386073686 | 2.12E-06 | 0.000265<br>402 |
| <i>TET1</i>      | NM_030625                              | MSTRG.3783      | 1118.6546<br>98 | -<br>2.355577563 | 2.22E-06 | 0.000276<br>713 |
| <i>GATAD2B</i>   | NM_020699                              | MSTRG.2041      | 903.79809<br>12 | -1.52702141      | 2.35E-06 | 0.000290<br>677 |
| <i>SSFA2</i>     | NM_001287505,NM_001130445              | MSTRG.19431     | 1657.6881<br>37 | -<br>1.642602312 | 2.69E-06 | 0.000329<br>488 |
| <i>GPAA1</i>     | NM_003801                              | MSTRG.31705     | 1714.3193<br>47 | 1.014065959      | 2.74E-06 | 0.000332<br>403 |
| <i>COX6C</i>     | NM_004374                              | MSTRG.31393     | 3002.1023<br>06 | 1.554290049      | 2.75E-06 | 0.000332<br>403 |
| <i>NDUFA3</i>    | NM_004542,NA                           | MSTRG.17502     | 1304.3019<br>34 | 1.358393407      | 2.78E-06 | 0.000334<br>174 |
| <i>PHF24</i>     | NM_001347982,NM_001347983              | ENSG00000122733 | 34.238242<br>55 | 2.186872224      | 2.82E-06 | 0.000334<br>174 |
| <i>ZNF677</i>    | NM_001317998,NM_182609                 | MSTRG.17474     | 321.17120<br>67 | -<br>1.921751669 | 2.82E-06 | 0.000334<br>174 |
| <i>AKR1B1</i>    | NM_001628,NM_001346142                 | MSTRG.30147     | 2345.0333<br>68 | 1.406691192      | 2.92E-06 | 0.000340<br>348 |
| <i>ZNF277</i>    | NM_021994                              | MSTRG.29947     | 659.25830<br>14 | -1.41297739      | 2.93E-06 | 0.000340<br>348 |
| <i>GDPD5</i>     | NM_030792                              | MSTRG.5737      | 209.00877<br>32 | 1.189398949      | 2.91E-06 | 0.000340<br>348 |
| <i>NDUFS5</i>    | NM_001184979                           | MSTRG.837       | 3715.2075<br>24 | 1.489943704      | 2.98E-06 | 0.000343<br>907 |
| <i>MRPL23</i>    | NM_021134                              | MSTRG.4633      | 601.12865<br>65 | 1.557311676      | 3.05E-06 | 0.000349<br>688 |
| <i>AKR1C2</i>    | NM_001354,NM_001321027,NM_001135241,NA | MSTRG.3243      | 379.44256<br>03 | 2.33180042       | 3.08E-06 | 0.000351<br>186 |
| <i>LINC00339</i> | NR_023918,NR_023919                    | MSTRG.476       | 154.42600<br>06 | 1.344764133      | 3.28E-06 | 0.000371<br>146 |
| <i>RLF</i>       | NM_012421                              | MSTRG.866       | 1442.9743<br>77 | -<br>1.289851119 | 3.35E-06 | 0.000376<br>993 |
| <i>HDAC5</i>     | NM_005474                              | MSTRG.14202     | 1446.9816<br>08 | -<br>1.048147486 | 3.44E-06 | 0.000384<br>93  |



|                    |                                                                                        |             |                 |                  |          |                 |
|--------------------|----------------------------------------------------------------------------------------|-------------|-----------------|------------------|----------|-----------------|
| <i>ADI1</i>        | NM_018269,NM_001306077                                                                 | MSTRG.17750 | 506.88668<br>29 | 1.40257942       | 3.53E-06 | 0.000392<br>774 |
| <i>F11R</i>        | NM_016946,NM_001348091,NM_001113206                                                    | MSTRG.2236  | 1102.0933<br>34 | -<br>1.630820461 | 3.64E-06 | 0.000399<br>545 |
| <i>GUCA1B</i>      | NM_002098,NM_018141                                                                    | MSTRG.27755 | 504.18557<br>96 | 1.850981092      | 3.66E-06 | 0.000399<br>545 |
| <i>UGP2</i>        | NM_001001521,<br>NM_006759                                                             | MSTRG.18354 | 1527.1862<br>94 | 1.172061963      | 3.66E-06 | 0.000399<br>545 |
| <i>HORMAD2-AS1</i> | NR_110541                                                                              | MSTRG.21627 | 89.292002<br>79 | -<br>2.647256075 | 3.87E-06 | 0.000419<br>76  |
| <i>PPP1R14B</i>    | NM_138689                                                                              | MSTRG.5379  | 924.53582<br>54 | 1.152047332      | 3.91E-06 | 0.000421<br>3   |
| <i>PRDX5</i>       | NM_181652                                                                              | MSTRG.5393  | 3857.2120<br>99 | 1.395165271      | 4.41E-06 | 0.000458<br>852 |
| <i>FAM221A</i>     | NM_001127364                                                                           | MSTRG.29039 | 114.64385<br>41 | 1.80652441       | 4.40E-06 | 0.000458<br>852 |
| <i>APOE</i>        | NM_001302690,<br>NM_001321066,<br>NM_001302691,<br>NM_001302689,<br>NM_001645          | MSTRG.17130 | 873.10919<br>87 | 2.143276829      | 4.40E-06 | 0.000458<br>852 |
| <i>AKR1C3</i>      | NM_001253908,<br>NM_001253909,<br>NM_003739                                            | MSTRG.3246  | 59.074378<br>96 | 2.41748662       | 4.39E-06 | 0.000458<br>852 |
| <i>NDUFA4L2</i>    | NM_020142                                                                              | MSTRG.7312  | 92.792993<br>67 | 2.297987224      | 4.29E-06 | 0.000458<br>852 |
| <i>MIA</i>         | NM_001202553,<br>NM_006533,NR_037775,NM_016154,NR_037791,NM_080732,NM_053046,NR_040249 | MSTRG.16997 | 1171.6191<br>46 | 0.830178165      | 4.32E-06 | 0.000458<br>852 |
| <i>NDUFAF5</i>     | NR_029377                                                                              | MSTRG.20265 | 354.73401<br>51 | 1.452118092      | 4.50E-06 | 0.000462<br>377 |
| <i>SP8</i>         | NM_198956                                                                              | MSTRG.28999 | 459.83739<br>82 | -<br>1.842944171 | 4.75E-06 | 0.000485<br>293 |
| <i>KMO</i>         | NM_003679                                                                              | MSTRG.3122  | 47.658095<br>09 | 2.942118195      | 4.88E-06 | 0.000495<br>748 |
| <i>TMSB15B</i>     | NM_194324,NA                                                                           | MSTRG.33941 | 288.41571<br>64 | 1.863653597      | 5.02E-06 | 0.000507<br>769 |
| <i>NA</i>          | NA,NR_130152,<br>NM_003902                                                             | MSTRG.1357  | 3707.3141<br>89 | -<br>0.984068542 | 5.16E-06 | 0.000518<br>278 |
| <i>RAB9B</i>       | NM_016370                                                                              | MSTRG.33933 | 213.40895<br>53 | 2.039792742      | 5.34E-06 | 0.000533<br>234 |

|                     |                                                     |             |                 |                  |          |                 |
|---------------------|-----------------------------------------------------|-------------|-----------------|------------------|----------|-----------------|
| <i>LOC100101478</i> | NR_130172,NM_194324                                 | MSTRG.33944 | 450.97051<br>21 | 1.722222008      | 5.45E-06 | 0.000541<br>082 |
| <i>PRDX4</i>        | NM_006406                                           | MSTRG.33302 | 3755.0968<br>47 | 1.657705278      | 5.66E-06 | 0.000559<br>56  |
| <i>GPD1L</i>        | NM_015141                                           | MSTRG.22330 | 308.27276<br>13 | 1.656612999      | 5.75E-06 | 0.000564<br>585 |
| <i>NBR1</i>         | NM_031862,NM_001291571,NM_001291572                 | MSTRG.14187 | 1701.1837<br>6  | -<br>1.099612858 | 5.92E-06 | 0.000578<br>543 |
| <i>ACBD7</i>        | NM_001039844                                        | MSTRG.3330  | 93.385454<br>34 | -<br>2.406592007 | 6.02E-06 | 0.000584<br>913 |
| <i>OAT</i>          | NM_001171814                                        | MSTRG.4461  | 1932.6619<br>91 | 1.357614361      | 6.37E-06 | 0.000615<br>592 |
| <i>NA</i>           | NA,NM_001304759,NR_130897                           | MSTRG.1128  | 331.87884<br>61 | 0.780779523      | 6.52E-06 | 0.000626<br>425 |
| <i>C7orf73</i>      | NM_001130929                                        | MSTRG.30164 | 1413.1283<br>61 | -<br>2.420113894 | 6.75E-06 | 0.000645<br>601 |
| <i>LAMTOR2</i>      | NM_001145264                                        | MSTRG.2145  | 646.49017<br>37 | 1.243674919      | 7.19E-06 | 0.000683<br>688 |
| <i>C5AR1</i>        | NM_001736,NA                                        | MSTRG.17225 | 44.172915<br>86 | -<br>2.600414602 | 7.57E-06 | 0.000716<br>192 |
| <i>GTF3A</i>        | NM_002097                                           | MSTRG.8368  | 1404.5609<br>49 | 1.375677228      | 7.73E-06 | 0.000727<br>469 |
| <i>FAH</i>          | NM_000137                                           | MSTRG.11261 | 348.86891<br>45 | 1.043427154      | 7.88E-06 | 0.000737<br>297 |
| <i>LOC102724219</i> | NM_001322044,NM_001322975                           | MSTRG.20899 | 69.304338<br>52 | 1.990687925      | 8.01E-06 | 0.000745<br>774 |
| <i>MRPS18C</i>      | NM_016067                                           | MSTRG.24659 | 542.52374<br>15 | 1.707292168      | 8.20E-06 | 0.000759<br>577 |
| <i>CDK4</i>         | NM_000075,NR_106817                                 | MSTRG.7338  | 3746.7540<br>79 | 1.258418767      | 8.27E-06 | 0.000762<br>098 |
| <i>ZBBX</i>         | NM_001199201,NM_001199202                           | MSTRG.23663 | 79.256468<br>9  | -<br>1.413561973 | 8.41E-06 | 0.000771<br>32  |
| <i>NA</i>           | NA                                                  | MSTRG.19159 | 37.196774<br>92 | 1.663143462      | 8.62E-06 | 0.000781<br>931 |
| <i>RFX3</i>         | NM_001282116,NM_001282117,NM_002919                 | MSTRG.31794 | 1809.5733<br>25 | -1.70106674      | 8.63E-06 | 0.000781<br>931 |
| <i>UROS</i>         | NR_136677,NM_001324037,NM_001324039                 | MSTRG.4477  | 1115.6171<br>2  | 1.37337375       | 8.66E-06 | 0.000781<br>931 |
| <i>PPP1R7</i>       | NM_001282410,NM_001282414,NM_001282412,NM_001282409 | MSTRG.20076 | 929.76530<br>78 | 1.068372845      | 8.71E-06 | 0.000782<br>219 |
| <i>MLLT10</i>       | NM_001324296,                                       | MSTRG.3403  | 1188.6214       | -1.09834631      | 9.49E-06 | 0.000848        |

|                  |                                                              |             |                 |                  |          |                 |
|------------------|--------------------------------------------------------------|-------------|-----------------|------------------|----------|-----------------|
|                  | NM_001324297,<br>NR_136736,NM<br>_001195630,NM<br>_001195626 |             | 73              |                  |          | 506             |
| <i>ZNF471</i>    | NM_001321768                                                 | MSTRG.17585 | 74.218260<br>6  | -<br>2.804179236 | 9.93E-06 | 0.000882<br>054 |
| <i>RSRC2</i>     | NM_023012                                                    | MSTRG.8082  | 1722.8184<br>75 | -<br>1.219700516 | 9.97E-06 | 0.000882<br>054 |
| <i>SCG5</i>      | NM_003020                                                    | MSTRG.10391 | 353.82729<br>05 | 2.165410376      | 1.01E-05 | 0.000887<br>342 |
| <i>NA</i>        | NA                                                           | MSTRG.33144 | 20.386860<br>84 | -<br>2.200980042 | 1.04E-05 | 0.000903<br>496 |
| <i>SDF2L1</i>    | NM_022044                                                    | MSTRG.21452 | 210.89917<br>93 | 1.255439121      | 1.05E-05 | 0.000913<br>128 |
| <i>ZMYM2</i>     | NM_197968,NM<br>_001190964,NM<br>_001190965                  | MSTRG.8262  | 2414.0958<br>8  | -<br>0.904341512 | 1.08E-05 | 0.000933<br>304 |
| <i>GPNMB</i>     | NM_002510                                                    | MSTRG.29022 | 124.71194<br>72 | 2.663846403      | 1.09E-05 | 0.000933<br>304 |
| <i>GNPDA1</i>    | NM_005471                                                    | MSTRG.26668 | 2093.2708<br>93 | 1.406961535      | 1.11E-05 | 0.000947<br>479 |
| <i>LOC554223</i> | NR_132323,NR_<br>001434,NM_001<br>242758,NA                  | MSTRG.27456 | 2144.3900<br>59 | 1.50501082       | 1.17E-05 | 0.000992<br>125 |
| <i>GUSBP4</i>    | NR_132999                                                    | MSTRG.27914 | 124.95315<br>38 | -<br>1.671952649 | 1.17E-05 | 0.000992<br>125 |
| <i>SMIM4</i>     | NM_001124767                                                 | MSTRG.22717 | 169.12663<br>44 | 1.495606667      | 1.28E-05 | 0.001065<br>184 |
| <i>NA</i>        | NA                                                           | MSTRG.32160 | 34.416614<br>92 | -1.45428358      | 1.27E-05 | 0.001065<br>184 |
| <i>NA</i>        | NA                                                           | MSTRG.6176  | 13.920623<br>61 | 2.80613848       | 1.27E-05 | 0.001065<br>184 |
| <i>SLC27A4</i>   | NM_005094                                                    | MSTRG.32809 | 1223.0396<br>92 | 1.371863359      | 1.29E-05 | 0.001074<br>296 |
| <i>NA</i>        | NA                                                           | MSTRG.3392  | 67.156578<br>17 | -<br>1.442458146 | 1.31E-05 | 0.001080<br>994 |
| <i>AK3</i>       | NM_001199855,<br>NM_001199853                                | MSTRG.31803 | 1336.1635<br>7  | -<br>1.282267078 | 1.32E-05 | 0.001090<br>264 |
| <i>NA</i>        | NA                                                           | MSTRG.13524 | 45.690430<br>15 | -<br>2.335936858 | 1.34E-05 | 0.001094<br>731 |
| <i>TIMM22</i>    | NM_013337                                                    | MSTRG.13159 | 592.60698<br>13 | 1.22330101       | 1.37E-05 | 0.001112<br>633 |
| <i>PSMB6</i>     | NM_001270481                                                 | MSTRG.13277 | 2495.9787<br>32 | 1.332356707      | 1.36E-05 | 0.001112<br>633 |
| <i>C1QTNF2</i>   | NM_031908                                                    | MSTRG.26845 | 17.965978<br>98 | 2.191617615      | 1.39E-05 | 0.001120<br>309 |

|                 |                                                               |             |             |             |             |          |             |
|-----------------|---------------------------------------------------------------|-------------|-------------|-------------|-------------|----------|-------------|
| <i>HNRNPUL1</i> | NM_144732,NM_007040,NM_001321208,NM_001321211                 | MSTRG.17018 | 4856.759568 | -           | 1.081364062 | 1.46E-05 | 0.001178984 |
| <i>CORIN</i>    | NM_001278585,NM_001278586                                     | MSTRG.24404 | 58.72575522 | -           | 2.719647792 | 1.47E-05 | 0.001180074 |
| <i>RRP36</i>    | NM_001329704,NA                                               | MSTRG.27784 | 563.0857079 | 0.915527649 |             | 1.51E-05 | 0.001204966 |
| ABC8            | NM_001282293                                                  | MSTRG.30342 | 383.5538753 | 0.979763849 |             | 1.65E-05 | 0.001308444 |
| ARNTL           | NM_001297719                                                  | MSTRG.4859  | 122.7594501 | 1.092721892 |             | 1.69E-05 | 0.001338044 |
| TFAP4           | NM_003223                                                     | MSTRG.11837 | 357.4007468 | -           | 1.582548999 | 1.70E-05 | 0.00133962  |
| LOC101927752    | NR_134303                                                     | MSTRG.30465 | 87.9281868  | 1.479863091 |             | 1.73E-05 | 0.001340293 |
| BCL2L1          | NM_001322242,NM_001191,NM_138578,NM_001317920                 | MSTRG.20430 | 957.697881  | 1.258217312 |             | 1.73E-05 | 0.001340293 |
| RAI14           | NM_015577,NM_001145520,NM_001145521,NM_001145523              | MSTRG.25623 | 1900.640409 | -           | 1.763533339 | 1.73E-05 | 0.001340293 |
| PSMG1           | NR_049728,NM_001320795                                        | MSTRG.21169 | 838.5591342 | 1.155344302 |             | 1.74E-05 | 0.001340293 |
| ARPC4           | NM_001024959,NM_001198780,NM_001198793,NM_005718,NM_001025930 | MSTRG.22122 | 2082.342481 | 1.027420241 |             | 1.75E-05 | 0.001340293 |
| TMEM147         | NM_001242598                                                  | MSTRG.16794 | 1726.731657 | 1.504564129 |             | 1.74E-05 | 0.001340293 |
| ZNF644          | NM_016620,NM_201269                                           | MSTRG.1438  | 1156.598484 | -           | 1.053669961 | 1.78E-05 | 0.001360068 |
| HIKESHI         | NM_016401,NM_001322404                                        | MSTRG.5868  | 1124.639485 | 1.413481823 |             | 1.80E-05 | 0.001367909 |
| RLN2            | NM_005059                                                     | MSTRG.31810 | 22.2240768  | 2.574468331 |             | 1.82E-05 | 0.00137377  |
| FAM184A         | NM_024581,NM_001100411                                        | MSTRG.28361 | 281.43234   | -           | 1.792356565 | 1.84E-05 | 0.001389404 |
| SERTAD4-AS1     | NR_024337                                                     | MSTRG.2768  | 11.08066615 | 2.459760996 |             | 1.95E-05 | 0.001423905 |
| LOC100506797    | NR_144530                                                     | MSTRG.18904 | 12.08167974 | -           | 2.326983718 | 1.91E-05 | 0.001423905 |
| CHD9            | NM_025134,NM                                                  | MSTRG.12480 | 1298.2258   | -1.5385758  |             | 1.93E-05 | 0.001423    |

|                |                                                                 |                     |                 |                  |          |                 |
|----------------|-----------------------------------------------------------------|---------------------|-----------------|------------------|----------|-----------------|
|                | _001308319                                                      |                     | 2               |                  |          | 905             |
| ROGDI          | NM_024589                                                       | MSTRG.11868         | 425.87088<br>8  | 1.125798548      | 1.95E-05 | 0.001423<br>905 |
| CDK5           | NM_004935                                                       | MSTRG.30345         | 563.65376<br>56 | 1.751075144      | 1.94E-05 | 0.001423<br>905 |
| ULBP2          | NM_025217                                                       | MSTRG.28595         | 38.876670<br>01 | 2.493792712      | 1.90E-05 | 0.001423<br>905 |
| LOC441155      | NM_001271675                                                    | MSTRG.27942         | 71.626638<br>73 | -<br>2.678612838 | 1.95E-05 | 0.001423<br>905 |
| TIMM17B        | NM_001167947                                                    | MSTRG.33499         | 1100.5422<br>59 | 1.206663163      | 1.97E-05 | 0.001430<br>899 |
| ZFP1           | NM_153688                                                       | MSTRG.12863         | 236.14374<br>85 | -<br>1.466982304 | 1.99E-05 | 0.001430<br>899 |
| SECISBP2       | NM_001282688,<br>NM_001282690                                   | MSTRG.32347         | 1182.4003<br>77 | -<br>1.146100907 | 1.99E-05 | 0.001430<br>899 |
| SLC25A4        | NM_001151                                                       | MSTRG.25366         | 1114.1374<br>48 | 1.644460671      | 2.00E-05 | 0.001430<br>899 |
| EIF2A          | NM_001319043                                                    | MSTRG.23549         | 1786.3659<br>15 | -<br>0.950380632 | 2.03E-05 | 0.001448<br>083 |
| TMEM53         | NM_001300746                                                    | MSTRG.972           | 156.91387<br>22 | 1.32097108       | 2.04E-05 | 0.001448<br>083 |
| SPICE1         | NM_144718,NM<br>_001331079                                      | MSTRG.23096         | 422.48762<br>4  | -<br>1.217418364 | 2.14E-05 | 0.001515<br>408 |
| DIXDC1         | NM_001278542,<br>NM_001037954,<br>NM_033425                     | MSTRG.6076          | 951.89033<br>23 | -1.49991046      | 2.15E-05 | 0.001518<br>697 |
| NDUFAF4        | NM_014165                                                       | MSTRG.28139         | 575.16365<br>37 | 1.44098462       | 2.22E-05 | 0.001557<br>953 |
| HMOX2          | NM_001127206,<br>NM_001127204,<br>NM_001286270,<br>NM_001127205 | MSTRG.11846         | 428.44368<br>25 | 1.289125484      | 2.26E-05 | 0.001582<br>089 |
| SLC1A5         | NM_005628,NM<br>_001145145,NM<br>_001145144                     | MSTRG.17215         | 2211.3499<br>56 | 1.229481488      | 2.31E-05 | 0.001608<br>013 |
| TRAPPC2L       | NR_134671,NM<br>_001318525                                      | MSTRG.13076         | 954.98324<br>77 | 1.503405452      | 2.32E-05 | 0.001608<br>055 |
| NKX6-2         | NM_177400,NA                                                    | MSTRG.4528          | 406.21077<br>71 | -<br>2.484304575 | 2.32E-05 | 0.001608<br>055 |
| LHFPL3         | NM_199000                                                       | MSTRG.29870         | 1000.3056<br>28 | -<br>1.450660633 | 2.34E-05 | 0.001614<br>686 |
| FDX1           | NM_004109                                                       | MSTRG.6054          | 363.85784<br>54 | 1.089151664      | 2.35E-05 | 0.001616<br>447 |
| ANKRD20A<br>8P | NR_003366                                                       | ENSG00000229<br>089 | 9.5234351<br>24 | -<br>2.266596146 | 2.36E-05 | 0.001617<br>749 |
| CSNK2A2        | NM_001896                                                       | MSTRG.12571         | 1476.5203       | -                | 2.40E-05 | 0.001632        |

|               |                                                                                                  |             |                 |                  |          |                 |
|---------------|--------------------------------------------------------------------------------------------------|-------------|-----------------|------------------|----------|-----------------|
|               |                                                                                                  |             | 75              | 0.920249388      |          | 659             |
| GMPPA         | NM_013335,NM_205847                                                                              | MSTRG.19879 | 328.32088<br>39 | 0.898943274      | 2.43E-05 | 0.001648<br>157 |
| FABP6         | NM_001130958,<br>NM_001040442,<br>NM_001445                                                      | MSTRG.26843 | 36.353388<br>87 | 2.342160695      | 2.45E-05 | 0.001654<br>393 |
| BRWD3         | NM_153252                                                                                        | MSTRG.33789 | 659.89472<br>61 | -<br>1.480201862 | 2.46E-05 | 0.001658<br>301 |
| MPP1          | NM_001166462                                                                                     | MSTRG.34344 | 128.71817<br>9  | 1.631403228      | 2.50E-05 | 0.001678<br>561 |
| EPHA4         | NM_001304537,<br>NM_001304536                                                                    | MSTRG.19873 | 1409.4894<br>04 | -<br>1.123694539 | 2.51E-05 | 0.001680<br>377 |
| NA            | NA                                                                                               | MSTRG.33835 | 61.511018<br>34 | 2.317538313      | 2.56E-05 | 0.001703<br>198 |
| ITGB1BP1      | NM_001319068,<br>NM_001319070                                                                    | MSTRG.17785 | 1009.7587<br>61 | 1.328867282      | 2.57E-05 | 0.001703<br>198 |
| NDUFB10       | NM_004548                                                                                        | MSTRG.11703 | 1480.6964<br>4  | 1.116393904      | 2.58E-05 | 0.001708<br>365 |
| DBNL          | NM_001014436,<br>NR_106896,NA                                                                    | MSTRG.29258 | 1070.1193<br>94 | 1.191630569      | 2.60E-05 | 0.001708<br>838 |
| ZNF714        | NM_182515                                                                                        | MSTRG.16615 | 268.44376<br>16 | -<br>1.503733006 | 2.60E-05 | 0.001708<br>838 |
| EEF1AKMT<br>1 | NM_174928                                                                                        | MSTRG.8270  | 123.06457<br>38 | 1.490860474      | 2.71E-05 | 0.001770<br>906 |
| TUBB4A        | NM_001289130,<br>NM_001289123                                                                    | MSTRG.16072 | 1374.6364<br>54 | 2.017509476      | 2.76E-05 | 0.001776<br>495 |
| KCNS2         | NM_020697                                                                                        | MSTRG.31359 | 11.777135<br>83 | 2.647036779      | 2.75E-05 | 0.001776<br>495 |
| AHI1          | NM_001134830,<br>NM_001134832                                                                    | MSTRG.28462 | 316.28448<br>19 | -1.6870829       | 2.75E-05 | 0.001776<br>495 |
| PPIG          | NM_004792                                                                                        | MSTRG.19280 | 1447.9738<br>59 | -<br>1.672326241 | 2.75E-05 | 0.001776<br>495 |
| SPATA13       | NM_001286792,<br>NR_104595,NM_001166271,<br>NR_031753,NM_001286793,<br>NM_001303138,NM_001303137 | MSTRG.8321  | 882.30932<br>5  | -<br>1.606273446 | 2.78E-05 | 0.001783<br>66  |
| NA            | NA                                                                                               | MSTRG.22456 | 13.582476<br>83 | 2.518317968      | 2.81E-05 | 0.001797<br>496 |
| DECR1         | NM_001359,NM_001330575                                                                           | MSTRG.31268 | 942.04149<br>35 | 1.091781138      | 2.84E-05 | 0.001806<br>232 |
| FAM118B       | NM_024556,NM_001330446                                                                           | MSTRG.6301  | 563.82677<br>81 | 1.126916743      | 2.85E-05 | 0.001806<br>232 |
| VPS29         | NM_016226                                                                                        | MSTRG.7864  | 718.45073       | 1.291396048      | 2.85E-05 | 0.001806        |

|                  |                                               |                     |                 |                  |          |                 |
|------------------|-----------------------------------------------|---------------------|-----------------|------------------|----------|-----------------|
|                  |                                               |                     | 3               |                  |          | 232             |
| KIF21A           | NM_001173463                                  | MSTRG.6933          | 2615.1113<br>47 | -<br>1.856080278 | 2.91E-05 | 0.001825<br>774 |
| NA               | NA                                            | ENSG00000236<br>816 | 8.0602403<br>17 | -<br>2.459880299 | 2.90E-05 | 0.001825<br>774 |
| MALAT1           | NR_002819,NR_<br>144569                       | MSTRG.5438          | 882.32868<br>04 | -<br>2.050597672 | 3.00E-05 | 0.001878<br>438 |
| UQCRQ            | NM_014402,NM_<br>_052971                      | MSTRG.26448         | 1850.2196<br>87 | 1.822358797      | 3.11E-05 | 0.001933<br>421 |
| RAB27B           | NM_004163                                     | MSTRG.15586         | 77.269127<br>54 | 2.151356972      | 3.10E-05 | 0.001933<br>421 |
| IDH3B            | NM_006899,NM_<br>_001258384                   | MSTRG.20149         | 960.01901<br>73 | 1.218904241      | 3.17E-05 | 0.001965<br>986 |
| KIAA1143         | NM_001320334                                  | MSTRG.22500         | 1169.1780<br>69 | -1.12107278      | 3.26E-05 | 0.002004<br>182 |
| MFSD1            | NM_001167903,<br>NA                           | MSTRG.23626         | 291.81205       | 1.227320821      | 3.25E-05 | 0.002004<br>182 |
| ALG14            | NM_001305242                                  | MSTRG.1504          | 216.35539<br>86 | 1.459578418      | 3.28E-05 | 0.002010<br>444 |
| CABLES1          | NM_001256438,<br>NM_001100619,<br>NM_138375   | MSTRG.15347         | 166.74312<br>34 | 1.770485857      | 3.29E-05 | 0.002011<br>588 |
| ZCCHC11          | NM_001009881                                  | MSTRG.1114          | 1531.2697<br>5  | -<br>1.779243104 | 3.41E-05 | 0.002064<br>778 |
| HSPB11           | NR_133632,NM_<br>_001316935                   | MSTRG.1142          | 563.23833<br>68 | 1.145893294      | 3.41E-05 | 0.002064<br>778 |
| LRP6             | NM_002336                                     | MSTRG.6656          | 1265.5156<br>98 | -<br>1.365678822 | 3.42E-05 | 0.002064<br>778 |
| CCDC102B         | NM_001093729,<br>NM_024781                    | MSTRG.15694         | 151.74110<br>51 | -<br>1.384131138 | 3.41E-05 | 0.002064<br>778 |
| BEX2             | NM_032621,NM_<br>_001168400                   | MSTRG.33916         | 761.05203<br>28 | 1.546830391      | 3.45E-05 | 0.002068<br>452 |
| CENPX            | NM_001330536,<br>NM_001271006                 | MSTRG.15053         | 569.13629<br>02 | 1.400947006      | 3.45E-05 | 0.002068<br>452 |
| SLIRP            | NM_001267863,<br>NM_001173978                 | MSTRG.9810          | 1330.7620<br>8  | 1.563195941      | 3.47E-05 | 0.002071<br>244 |
| LOC100506<br>124 | NR_045375,NM_<br>_024753                      | MSTRG.19255         | 594.15203<br>86 | -<br>0.973459128 | 3.49E-05 | 0.002077<br>396 |
| MAEA             | NR_123716,NM_<br>_001297432,NM_<br>_001297433 | MSTRG.24081         | 1203.9895<br>81 | 0.827141567      | 3.52E-05 | 0.002085<br>067 |
| ANKRD20A<br>4    | NM_001098805                                  | ENSG00000172<br>014 | 17.448350<br>92 | -<br>2.086603404 | 3.72E-05 | 0.002198<br>436 |
| SEMA3E           | NM_012431,NM_<br>_001178129                   | MSTRG.29607         | 114.60772<br>06 | 1.999726032      | 3.82E-05 | 0.002242<br>484 |
| SP4              | NM_001326542,                                 | MSTRG.29002         | 383.81719       | -                | 3.84E-05 | 0.002247        |

|         |                                                            |             |                 |                  |          |                 |
|---------|------------------------------------------------------------|-------------|-----------------|------------------|----------|-----------------|
|         | NR_031594,NR_137166                                        |             | 75              | 0.994548319      |          | 528             |
| RPE65   | NM_000329                                                  | MSTRG.1274  | 43.363392<br>54 | -<br>2.174128982 | 3.85E-05 | 0.002247<br>644 |
| DOLK    | NM_014908                                                  | MSTRG.32842 | 448.68872<br>55 | 1.465923117      | 3.95E-05 | 0.002286<br>094 |
| PTCD1   | NM_015545,NM_001198879,NM_001003713                        | MSTRG.29742 | 2495.2987<br>74 | 0.995937447      | 3.94E-05 | 0.002286<br>094 |
| PWP2    | NM_005049                                                  | MSTRG.21234 | 245.71450<br>26 | 0.984666865      | 3.96E-05 | 0.002286<br>094 |
| SNX17   | NM_001267059                                               | MSTRG.17973 | 1730.1282<br>5  | 1.206492026      | 4.03E-05 | 0.002319<br>669 |
| CD83    | NM_001251901,<br>NM_001040280                              | MSTRG.27234 | 156.15163<br>69 | 1.39122417       | 4.06E-05 | 0.002325<br>884 |
| FAM173A | NM_001271285                                               | MSTRG.11641 | 241.87096<br>39 | 1.230174354      | 4.07E-05 | 0.002325<br>884 |
| NA      | NA                                                         | MSTRG.33051 | 565.09670<br>06 | -0.9786739       | 4.10E-05 | 0.002335<br>704 |
| PPP2R2C | NM_181876,NM_001206994,NM_001206996,NM_020416,NM_001206995 | MSTRG.24150 | 58.595480<br>77 | 1.436948216      | 4.17E-05 | 0.002364<br>995 |
| SNF8    | NM_001317192                                               | MSTRG.14384 | 1043.6132<br>76 | 1.443038714      | 4.18E-05 | 0.002364<br>995 |
| DDHD1   | NM_001160148                                               | MSTRG.9446  | 23.581847<br>72 | -<br>2.066852659 | 4.20E-05 | 0.002372<br>855 |
| BMP6    | NM_001718                                                  | MSTRG.27186 | 38.788756<br>97 | -<br>1.938654481 | 4.27E-05 | 0.002404<br>845 |
| DGCR6L  | NM_033257                                                  | MSTRG.21409 | 683.05294<br>31 | 1.294981664      | 4.36E-05 | 0.002436<br>464 |
| NKX2-5  | NM_001166176                                               | MSTRG.26953 | 17.339747<br>52 | 2.533971766      | 4.35E-05 | 0.002436<br>464 |
| TCEAL5  | NM_001012979                                               | MSTRG.33908 | 166.28950<br>22 | 1.828968724      | 4.40E-05 | 0.002442<br>924 |
| NA      | NA                                                         | MSTRG.12613 | 10.393713<br>09 | 2.505963224      | 4.51E-05 | 0.002497<br>818 |
| NDUFS6  | NM_004553                                                  | MSTRG.25443 | 1445.2124<br>05 | 1.410421708      | 4.53E-05 | 0.002504<br>827 |
| NT5C2   | NM_001134373                                               | MSTRG.4280  | 1094.8870<br>63 | 1.110314346      | 4.58E-05 | 0.002513<br>635 |
| PGP     | NM_001042371,<br>NM_182563                                 | MSTRG.11733 | 501.22812<br>79 | 1.620464064      | 4.58E-05 | 0.002513<br>635 |
| SMPD2   | NM_003080                                                  | MSTRG.28253 | 116.02931<br>21 | 0.871351681      | 4.70E-05 | 0.002531<br>208 |



|                  |                                                              |             |                 |                  |          |                 |
|------------------|--------------------------------------------------------------|-------------|-----------------|------------------|----------|-----------------|
| ZNF337           | NM_001290261,<br>NM_015655                                   | MSTRG.20393 | 160.60231<br>2  | -2.01979059      | 4.71E-05 | 0.002531<br>208 |
| EGF              | NM_001178130                                                 | MSTRG.24885 | 149.87386<br>46 | -<br>2.012031482 | 4.78E-05 | 0.002531<br>208 |
| POMZP3           | NM_152992                                                    | MSTRG.29557 | 151.44767<br>43 | -<br>0.888527822 | 4.75E-05 | 0.002531<br>208 |
| PDZD11           | NM_016484                                                    | MSTRG.33659 | 675.79714<br>83 | 1.39864942       | 4.77E-05 | 0.002531<br>208 |
| PIN1             | NR_038422                                                    | MSTRG.16164 | 1520.5588<br>75 | 1.170807837      | 4.73E-05 | 0.002531<br>208 |
| FAIM2            | NM_012306                                                    | MSTRG.7082  | 346.50470<br>01 | 2.06497783       | 4.70E-05 | 0.002531<br>208 |
| LOC101928<br>509 | NR_125896                                                    | MSTRG.25309 | 9.0125999<br>9  | 2.466158858      | 4.68E-05 | 0.002531<br>208 |
| SEC31B           | NM_015490,NM<br>_001284367                                   | MSTRG.4206  | 2481.6396<br>63 | 1.350645446      | 4.69E-05 | 0.002531<br>208 |
| GPBP1            | NM_001203246,<br>NM_001127235,<br>NM_001127236               | MSTRG.25794 | 2071.8891<br>99 | -<br>0.870772843 | 4.71E-05 | 0.002531<br>208 |
| ZHX2             | NM_014943                                                    | MSTRG.31506 | 442.15615<br>07 | -<br>1.474685189 | 4.76E-05 | 0.002531<br>208 |
| ABRACL           | NM_021243                                                    | MSTRG.28499 | 674.40866<br>59 | 1.185512391      | 4.73E-05 | 0.002531<br>208 |
| SMC2             | NM_001042551,<br>NM_001042550                                | MSTRG.32531 | 794.48778<br>05 | -<br>1.367098437 | 4.84E-05 | 0.002536<br>982 |
| MAGI3            | NM_001142782                                                 | MSTRG.1685  | 403.60461<br>65 | -1.43627908      | 4.82E-05 | 0.002536<br>982 |
| MDFIC            | NM_199072,NM<br>_001166346                                   | MSTRG.29961 | 246.91258<br>53 | -<br>1.096408196 | 4.81E-05 | 0.002536<br>982 |
| ATP6AP2          | NM_005765                                                    | MSTRG.33392 | 3118.8834<br>06 | 1.289415684      | 4.97E-05 | 0.002590<br>721 |
| ADCK2            | NM_052853,NM<br>_004546                                      | MSTRG.30233 | 1397.2384<br>19 | 1.428477348      | 5.01E-05 | 0.002604<br>65  |
| ETV1             | NM_001163147,<br>NM_001163152,<br>NM_001163148,<br>NR_120445 | MSTRG.28961 | 351.74657<br>84 | -<br>1.104512818 | 5.03E-05 | 0.002608<br>618 |
| PRCD             | NM_001077620,<br>NR_033357,NA                                | MSTRG.14888 | 23.723913<br>24 | 2.000924282      | 5.12E-05 | 0.002621<br>791 |
| PUM1             | NM_001020658,<br>NR_003066,NR_<br>004054                     | MSTRG.668   | 2259.5021<br>23 | -<br>0.945720871 | 5.11E-05 | 0.002621<br>791 |
| HMGB2            | NM_002129,NM<br>_001130689                                   | MSTRG.25300 | 7189.5841<br>16 | -<br>1.175945658 | 5.10E-05 | 0.002621<br>791 |
| EPN3             | NM_017957,NM<br>_001258372                                   | MSTRG.14442 | 372.06635<br>15 | -<br>0.929649277 | 5.10E-05 | 0.002621<br>791 |

|         |                                                                                                                                                                                                                                                                                                                                                                                                                       |             |                 |                  |          |                 |
|---------|-----------------------------------------------------------------------------------------------------------------------------------------------------------------------------------------------------------------------------------------------------------------------------------------------------------------------------------------------------------------------------------------------------------------------|-------------|-----------------|------------------|----------|-----------------|
| GOT1    | NM_002079                                                                                                                                                                                                                                                                                                                                                                                                             | MSTRG.4176  | 1207.5356<br>48 | 1.305996158      | 5.16E-05 | 0.002627<br>509 |
| RAB32   | NM_006834                                                                                                                                                                                                                                                                                                                                                                                                             | MSTRG.28547 | 248.28413<br>11 | 2.13305063       | 5.15E-05 | 0.002627<br>509 |
| JAG1    | NM_000214,NR<br>_106930                                                                                                                                                                                                                                                                                                                                                                                               | MSTRG.20246 | 4995.4539<br>07 | -<br>1.302734308 | 5.26E-05 | 0.002664<br>596 |
| CCDC191 | NM_020817                                                                                                                                                                                                                                                                                                                                                                                                             | MSTRG.23115 | 134.07792<br>66 | -<br>1.803180632 | 5.27E-05 | 0.002664<br>596 |
| NA      | NA                                                                                                                                                                                                                                                                                                                                                                                                                    | MSTRG.11352 | 116.33535<br>47 | -<br>1.418211947 | 5.27E-05 | 0.002664<br>596 |
| PINK1   | NM_032409,NR<br>_106732                                                                                                                                                                                                                                                                                                                                                                                               | MSTRG.446   | 567.78651<br>66 | 1.137353783      | 5.39E-05 | 0.002715<br>841 |
| NOC3L   | NM_022451                                                                                                                                                                                                                                                                                                                                                                                                             | MSTRG.4118  | 452.96074<br>93 | -<br>0.927235571 | 5.52E-05 | 0.002751<br>866 |
| PCDHA1  | NM_031410,NM<br>_018900,NM_03<br>1495,NM_01890<br>5,NM_031496,N<br>M_031497,NM_<br>031500,NM_018<br>906,NM_018907<br>,NM_031501,N<br>M_018908,NM_<br>031848,NM_031<br>849,NM_031852<br>,NM_018910,N<br>M_031856,NM_<br>018911,NM_031<br>857,NM_014005<br>,NM_031859,N<br>M_031860,NM_<br>031861,NM_018<br>902,NM_031864<br>,NM_018903,N<br>M_018904,NM_<br>031865,NM_031<br>882,NM_018898<br>,NM_018899,N<br>M_031883 | MSTRG.26606 | 1288.0018<br>31 | 1.013753458      | 5.50E-05 | 0.002751<br>866 |
| RBBP7   | NM_001198719,<br>NM_002893                                                                                                                                                                                                                                                                                                                                                                                            | MSTRG.33260 | 3878.3468<br>13 | 1.070619318      | 5.52E-05 | 0.002751<br>866 |
| ZNF92   | NM_001287532                                                                                                                                                                                                                                                                                                                                                                                                          | MSTRG.29378 | 647.85624<br>89 | -<br>0.817913057 | 5.60E-05 | 0.002770<br>573 |
| GCH1    | NM_000161                                                                                                                                                                                                                                                                                                                                                                                                             | MSTRG.9453  | 81.665227<br>84 | 2.074290414      | 5.61E-05 | 0.002770<br>573 |
| NDUFS2  | NM_004550,NM<br>_001166159                                                                                                                                                                                                                                                                                                                                                                                            | MSTRG.2250  | 1955.0359<br>65 | 0.795969222      | 5.61E-05 | 0.002770<br>573 |

|                  |                                             |             |                 |                  |          |                 |
|------------------|---------------------------------------------|-------------|-----------------|------------------|----------|-----------------|
| GALE             | NM_000403,NM_001008216,NM_001127621         | MSTRG.520   | 465.36664<br>22 | 1.282971477      | 5.75E-05 | 0.002826<br>035 |
| TBL1Y            | NM_033284                                   | MSTRG.34387 | 9.3555578<br>67 | -<br>2.387540296 | 5.80E-05 | 0.002842<br>993 |
| NA               | NA                                          | MSTRG.20417 | 9.3443569<br>26 | 2.314764887      | 5.88E-05 | 0.002871<br>72  |
| NAA16            | NM_024561,NM_001110798                      | MSTRG.8486  | 461.57534<br>03 | -<br>1.584179048 | 5.94E-05 | 0.002896<br>259 |
| KIF20B           | NM_001284259                                | MSTRG.4071  | 615.40480<br>95 | -<br>1.881654132 | 5.97E-05 | 0.002899<br>821 |
| NTAN1            | NM_001270766                                | MSTRG.12016 | 745.27241<br>91 | 0.966909172      | 6.02E-05 | 0.002919<br>562 |
| IGF2BP2          | NM_001007225,<br>NM_001291872,<br>NR_049838 | MSTRG.23853 | 2037.1518<br>81 | -<br>1.669250811 | 6.06E-05 | 0.002922<br>705 |
| LOC101929<br>411 | NR_135549,NM_175056                         | MSTRG.23035 | 27.515226<br>75 | 2.508366115      | 6.06E-05 | 0.002922<br>705 |
| LRR1Q1           | NM_001079910                                | MSTRG.7563  | 78.734309<br>07 | -<br>1.923740413 | 6.10E-05 | 0.002931<br>498 |
| INTS9            | NM_001172562,<br>NM_018250                  | MSTRG.30746 | 457.62770<br>77 | 0.740621008      | 6.13E-05 | 0.002931<br>498 |
| COPS6            | NM_006833                                   | MSTRG.29759 | 1870.0161<br>49 | 1.158894327      | 6.13E-05 | 0.002931<br>498 |
| TMEM14A          | NM_014051                                   | MSTRG.27882 | 514.27149<br>9  | 1.495375616      | 6.20E-05 | 0.002957<br>235 |
| TANC2            | NM_025185                                   | MSTRG.14638 | 535.95673<br>35 | -<br>1.208088314 | 6.32E-05 | 0.003003<br>579 |
| QPCT             | NM_012413                                   | MSTRG.18075 | 60.427208<br>68 | 2.271636118      | 6.53E-05 | 0.003095<br>359 |
| LZTFL1           | NR_075080,NM_001276379                      | MSTRG.22520 | 674.10173<br>14 | -<br>0.849230712 | 6.55E-05 | 0.003100<br>429 |
| AFTPH            | NM_001002243                                | MSTRG.18361 | 705.89961<br>13 | -0.90999671      | 6.61E-05 | 0.003104<br>301 |
| NA               | NA                                          | MSTRG.7066  | 7574.1837<br>71 | 1.578757097      | 6.60E-05 | 0.003104<br>301 |
| UAP1L1           | NM_207309                                   | MSTRG.33002 | 268.65153<br>68 | 2.097693343      | 6.61E-05 | 0.003104<br>301 |
| NA               | NA                                          | MSTRG.33065 | 427.00573<br>11 | 1.191366263      | 6.67E-05 | 0.003122<br>857 |
| C7orf76          | NM_001201450,<br>NR_038948,NM_006304        | MSTRG.29706 | 1741.6627<br>77 | 1.23407372       | 6.71E-05 | 0.003122<br>857 |
| MPC1             | NM_001270879                                | MSTRG.28754 | 515.72663<br>21 | 1.30419767       | 6.69E-05 | 0.003122<br>857 |
| MSL2             | NM_018133                                   | MSTRG.23385 | 891.04682       | -                | 6.90E-05 | 0.003204        |

|          |                                                                                                           |             |                 |                  |          |                 |
|----------|-----------------------------------------------------------------------------------------------------------|-------------|-----------------|------------------|----------|-----------------|
|          |                                                                                                           |             | 98              | 0.657547046      |          | 524             |
| POP4     | NM_006627                                                                                                 | MSTRG.16703 | 325.60070<br>18 | 1.292175401      | 6.95E-05 | 0.003221<br>196 |
| ZNF800   | NM_176814                                                                                                 | MSTRG.30033 | 11.980099<br>46 | -<br>1.994888449 | 6.98E-05 | 0.003225<br>757 |
| BCAS3    | NM_001330413,<br>NM_001320470                                                                             | MSTRG.14593 | 586.65826<br>14 | 0.79386621       | 7.12E-05 | 0.003280<br>831 |
| HLA-DMB  | NM_002118,NM<br>_006120                                                                                   | MSTRG.27605 | 44.560592<br>51 | 2.078433105      | 7.14E-05 | 0.003280<br>831 |
| DFNA5    | NM_001127454,<br>NM_001127453                                                                             | MSTRG.29045 | 393.24541<br>66 | 1.014062434      | 7.18E-05 | 0.003289<br>127 |
| SPRY1    | NM_001258038,<br>NM_001258039,<br>NM_005841                                                               | MSTRG.24995 | 259.95763<br>87 | -<br>1.941229058 | 7.19E-05 | 0.003289<br>127 |
| ZNF710   | NM_198526                                                                                                 | MSTRG.11420 | 490.54038<br>13 | -<br>1.438108396 | 7.25E-05 | 0.003305<br>103 |
| RASA4CP  | NR_024116                                                                                                 | MSTRG.29249 | 208.55579<br>83 | -<br>1.260668331 | 7.41E-05 | 0.003359<br>921 |
| ACSS2    | NM_001242393,<br>NM_001076552                                                                             | MSTRG.20511 | 613.39745<br>15 | 0.880791965      | 7.52E-05 | 0.003402<br>787 |
| ATP13A2  | NM_022089                                                                                                 | MSTRG.408   | 1016.6425<br>78 | 0.991895233      | 7.54E-05 | 0.003404<br>763 |
| NUP43    | NM_198887                                                                                                 | MSTRG.28604 | 583.43665<br>8  | -<br>1.116291345 | 7.57E-05 | 0.003408<br>314 |
| KIAA1958 | NM_001287036                                                                                              | MSTRG.32610 | 872.74540<br>14 | -1.41584739      | 7.63E-05 | 0.003416<br>226 |
| NAE1     | NM_003905                                                                                                 | MSTRG.12640 | 2068.8291<br>82 | 0.878252474      | 7.62E-05 | 0.003416<br>226 |
| PNISR    | NM_001322413,<br>NM_001322418                                                                             | MSTRG.28158 | 1763.0068<br>92 | -<br>1.513050645 | 7.67E-05 | 0.003426<br>149 |
| RCAN1    | NM_001285393,<br>NM_001285392,<br>NM_203417,NM<br>_203418,NM_00<br>1331016,NM_00<br>1285389,NM_00<br>4414 | MSTRG.21113 | 643.56138<br>33 | 1.772642745      | 7.77E-05 | 0.003462<br>187 |
| MIEN1    | NM_032339                                                                                                 | MSTRG.14049 | 475.85971<br>86 | 2.015867047      | 7.83E-05 | 0.003480<br>039 |
| YWHAH    | NM_003405                                                                                                 | MSTRG.21683 | 3895.2827<br>47 | 0.935637595      | 7.96E-05 | 0.003511<br>445 |
| BAZ2A    | NM_001300905,<br>NM_013449                                                                                | MSTRG.7295  | 2116.0604<br>18 | -<br>1.369089914 | 7.95E-05 | 0.003511<br>445 |
| C21orf33 | NM_004649,NM<br>_001320384                                                                                | MSTRG.21237 | 892.46660<br>58 | 1.093473987      | 7.96E-05 | 0.003511<br>445 |
| DNAJC25  | NM_001015882,                                                                                             | MSTRG.32589 | 1383.7844       | 1.31474908       | 8.13E-05 | 0.003569        |

|          |                                                                 |             |                 |                  |          |                 |
|----------|-----------------------------------------------------------------|-------------|-----------------|------------------|----------|-----------------|
|          | NM_004125,NM_001017998                                          |             | 38              |                  |          | 265             |
| NGLY1    | NM_001145293,<br>NM_001145294                                   | MSTRG.22297 | 659.22917<br>67 | 0.635071687      | 8.16E-05 | 0.003573<br>924 |
| NA       | NA,NM_001303<br>114,NM_032704                                   | MSTRG.7068  | 19222.409<br>17 | 1.342828581      | 8.37E-05 | 0.003650<br>097 |
| DAD1     | NM_001344                                                       | MSTRG.8993  | 3032.8756<br>08 | 1.534281276      | 8.36E-05 | 0.003650<br>097 |
| NTMT1    | NM_001286796,<br>NM_001286797,<br>NM_001286803,<br>NM_001286799 | MSTRG.32855 | 406.77500<br>83 | 1.162431092      | 8.45E-05 | 0.003672<br>825 |
| NA       | NA                                                              | MSTRG.32287 | 133.28804<br>95 | -<br>2.470270244 | 8.57E-05 | 0.003718<br>385 |
| CDK5R2   | NM_003936                                                       | MSTRG.19844 | 133.40771<br>79 | 2.131103157      | 8.73E-05 | 0.003749<br>1   |
| ZC3H6    | NM_198581                                                       | MSTRG.18868 | 248.54771<br>78 | -<br>1.682885738 | 8.67E-05 | 0.003749<br>1   |
| MBD3     | NM_001281453,<br>NM_006830                                      | MSTRG.15877 | 3511.4352<br>19 | 1.406296247      | 8.75E-05 | 0.003749<br>1   |
| CEP295   | NM_033395,NR_002569                                             | MSTRG.5948  | 337.52125<br>47 | -<br>2.169460205 | 8.71E-05 | 0.003749<br>1   |
| PPM1H    | NM_020700                                                       | MSTRG.7374  | 275.39337<br>01 | 1.344320632      | 8.69E-05 | 0.003749<br>1   |
| DRAP1    | NM_006442                                                       | MSTRG.5469  | 1329.3343<br>39 | 0.679100256      | 8.94E-05 | 0.003816<br>892 |
| ZNF626   | NM_001076675                                                    | MSTRG.16608 | 13.282229<br>03 | 2.430712384      | 8.95E-05 | 0.003816<br>892 |
| BCL7C    | NM_001286526,<br>NR_039744,NM_004765                            | MSTRG.12336 | 824.66859<br>37 | 1.256838423      | 8.97E-05 | 0.003818<br>446 |
| MRPL52   | NM_178336                                                       | MSTRG.9088  | 761.67315<br>92 | 1.324268007      | 9.03E-05 | 0.003834<br>144 |
| STEAP1   | NM_012449                                                       | MSTRG.29644 | 40.208156<br>71 | 1.655351731      | 9.17E-05 | 0.003882<br>582 |
| JPX      | NR_024582                                                       | MSTRG.33723 | 594.37234<br>21 | 1.232338148      | 9.19E-05 | 0.003883<br>477 |
| NA       | NA                                                              | MSTRG.15692 | 11.281942<br>19 | -<br>2.046822048 | 9.22E-05 | 0.003886<br>391 |
| CTNS     | NM_004937                                                       | MSTRG.13236 | 293.65432<br>39 | 1.055283243      | 9.38E-05 | 0.003942<br>624 |
| ZNF610   | NM_001161425,<br>NM_173530                                      | MSTRG.17438 | 104.08717       | -<br>1.651283698 | 9.43E-05 | 0.003954<br>938 |
| FUCA1    | NM_000147                                                       | MSTRG.518   | 384.62445<br>1  | 1.598241945      | 9.46E-05 | 0.003954<br>938 |
| GADD45GI | NM_052850                                                       | MSTRG.16326 | 1535.2275       | 1.255654123      | 9.47E-05 | 0.003954        |

|          |                                                           |             |                 |                  |                 |                 |
|----------|-----------------------------------------------------------|-------------|-----------------|------------------|-----------------|-----------------|
| P1       |                                                           |             | 95              |                  |                 | 938             |
| MDH1     | NM_001316374,<br>NM_001199111                             | MSTRG.18341 | 4710.1417<br>99 | 1.200511992      | 9.58E-05        | 0.003990<br>946 |
| ZMPSTE24 | NM_005857                                                 | MSTRG.869   | 967.52624<br>9  | 1.430332328      | 9.90E-05        | 0.004112<br>371 |
| MPDU1    | NM_004870                                                 | MSTRG.13380 | 868.96027<br>01 | 1.214160036      | 9.92E-05        | 0.004112<br>371 |
| MED27    | NM_001253881,<br>NM_001253882                             | MSTRG.32897 | 738.97991<br>69 | 1.189451029      | 0.00010<br>0519 | 0.004139<br>717 |
| ABHD8    | NM_024527                                                 | MSTRG.16454 | 363.73539<br>7  | 0.898375405      | 0.00010<br>0549 | 0.004139<br>717 |
| CLEC2L   | NM_001080511                                              | MSTRG.30209 | 15.702344<br>76 | 2.399541917      | 0.00010<br>0337 | 0.004139<br>717 |
| NA       | NA                                                        | MSTRG.1892  | 32.476097<br>8  | 2.179680262      | 0.00010<br>1499 | 0.004169<br>192 |
| STS      | NM_001320752,<br>NR_039924,NM<br>_000351                  | MSTRG.33186 | 170.91855<br>72 | 1.659698318      | 0.00010<br>2792 | 0.004212<br>593 |
| PET100   | NM_001171155,<br>NM_001127396                             | MSTRG.16098 | 977.99306<br>23 | 1.492997216      | 0.00010<br>3115 | 0.004216<br>088 |
| MYBL1    | NM_001080416                                              | MSTRG.31077 | 160.49768<br>07 | -<br>1.867991765 | 0.00010<br>3515 | 0.004222<br>727 |
| NA       | NA                                                        | MSTRG.29269 | 56.782801<br>64 | -<br>2.111065666 | 0.00010<br>4411 | 0.004230<br>194 |
| SOS1     | NM_005633                                                 | MSTRG.18115 | 47.607818<br>88 | -<br>2.205008965 | 0.00010<br>4328 | 0.004230<br>194 |
| INIP     | NM_021218                                                 | MSTRG.32614 | 544.18728<br>49 | -<br>1.219382113 | 0.00010<br>4131 | 0.004230<br>194 |
| PARK7    | NM_001123377                                              | MSTRG.208   | 3013.5833<br>85 | 1.126352289      | 0.00010<br>4821 | 0.004237<br>149 |
| TSC22D3  | NM_001015881,<br>NM_004089,NM<br>_001318470,NM<br>_198057 | MSTRG.33972 | 1443.6969<br>13 | 1.421964739      | 0.00010<br>5136 | 0.004240<br>261 |
| ZFR      | NM_016107,NR<br>_030305                                   | MSTRG.25594 | 4149.9592<br>08 | -<br>0.879197707 | 0.00010<br>6229 | 0.004264<br>995 |
| NCDN     | NM_001014839                                              | MSTRG.764   | 757.16560<br>92 | 0.880703387      | 0.00010<br>8086 | 0.004329<br>786 |
| DDX25    | NM_013264,NM<br>_001330438,NA                             | MSTRG.6289  | 169.99655<br>3  | 1.520776622      | 0.00010<br>8748 | 0.004346<br>512 |
| TTBK2    | NM_173500                                                 | MSTRG.10581 | 696.62362<br>79 | -<br>1.127720549 | 0.00011<br>0815 | 0.004419<br>172 |
| LAMTOR1  | NM_017907                                                 | MSTRG.5642  | 1645.1233<br>1  | 1.575145874      | 0.00011<br>2478 | 0.004475<br>466 |
| S100A16  | NM_001317007,<br>NM_080388                                | MSTRG.2032  | 234.42551<br>62 | 1.906957668      | 0.00011<br>3259 | 0.004496<br>478 |

|                  |                                                                                             |             |                 |                  |                 |                 |
|------------------|---------------------------------------------------------------------------------------------|-------------|-----------------|------------------|-----------------|-----------------|
| SLC35E4          | NM_001001479,<br>NM_001318370,<br>NM_001318371                                              | MSTRG.21647 | 94.853960<br>8  | 1.057555703      | 0.00011<br>6456 | 0.004613<br>092 |
| TCN2             | NM_000355                                                                                   | MSTRG.21655 | 525.15204<br>93 | 1.411769857      | 0.00011<br>8105 | 0.004668<br>023 |
| GPBP1L1          | NM_021639,NR<br>_026768                                                                     | MSTRG.1006  | 1342.5409<br>26 | -<br>1.062794794 | 0.00011<br>8661 | 0.004669<br>263 |
| GBAT2            | NR_131972                                                                                   | MSTRG.2000  | 110.39516<br>39 | 1.722074985      | 0.00011<br>8583 | 0.004669<br>263 |
| IPO7             | NM_006391                                                                                   | MSTRG.4805  | 7049.8239<br>75 | -<br>0.820515607 | 0.00011<br>9225 | 0.004674<br>104 |
| CKMT1A           | NM_001321927,<br>NM_001321928                                                               | MSTRG.10602 | 107.21037<br>51 | 1.895145612      | 0.00011<br>931  | 0.004674<br>104 |
| LOC100130<br>357 | NR_134859,NM<br>_001318809,NR<br>_134872,NM_00<br>1242698,NM_00<br>1318805,NM_00<br>1318806 | MSTRG.27225 | 610.03744<br>13 | 1.016883682      | 0.00011<br>9663 | 0.004677<br>622 |
| NDUFA8           | NM_014222                                                                                   | MSTRG.32685 | 889.67947<br>08 | 1.306854535      | 0.00012<br>0079 | 0.004683<br>6   |
| POLDIP3          | NM_001278657                                                                                | MSTRG.21926 | 2901.6878<br>25 | -<br>0.604485858 | 0.00012<br>1373 | 0.004716<br>907 |
| NIT2             | NM_020202                                                                                   | MSTRG.23011 | 474.55648<br>61 | 1.212274536      | 0.00012<br>1463 | 0.004716<br>907 |
| NA               | NA                                                                                          | MSTRG.5554  | 267.94234<br>37 | 1.703808917      | 0.00012<br>2012 | 0.004727<br>907 |
| NA               | NA                                                                                          | MSTRG.3670  | 8.2972592<br>34 | -2.28025758      | 0.00012<br>391  | 0.004770<br>256 |
| RFX3-AS1         | NR_121586                                                                                   | MSTRG.31784 | 10.032552<br>64 | -<br>2.012179012 | 0.00012<br>3786 | 0.004770<br>256 |
| NDUFB1           | NM_004545                                                                                   | MSTRG.9906  | 790.23884<br>64 | 1.266990405      | 0.00012<br>343  | 0.004770<br>256 |
| ATP5G3           | NM_001190329,<br>NM_001002258                                                               | MSTRG.19356 | 4445.0985<br>13 | 1.179372285      | 0.00012<br>6291 | 0.004851<br>426 |
| SLC25A14         | NM_001282197                                                                                | MSTRG.34126 | 280.46465<br>9  | 1.39776585       | 0.00012<br>6573 | 0.004851<br>766 |
| ZDHHC16          | NM_001287803                                                                                | MSTRG.4167  | 517.10711<br>89 | 1.439256599      | 0.00012<br>7412 | 0.004873<br>45  |
| RSRP1            | NR_135143,NM<br>_001321772,NR<br>_135777,NR_13<br>5790                                      | MSTRG.536   | 289.11745<br>81 | -<br>1.705357983 | 0.00012<br>9016 | 0.004924<br>212 |
| SMDT1            | NM_033318                                                                                   | MSTRG.21904 | 766.64454<br>12 | 1.631804966      | 0.00013<br>0515 | 0.004970<br>74  |
| DLD              | NM_000108                                                                                   | MSTRG.29929 | 1797.9984       | 0.80135373       | 0.00013         | 0.005015        |

|          |                                  |             |                 |                  |                 |                 |
|----------|----------------------------------|-------------|-----------------|------------------|-----------------|-----------------|
|          |                                  |             | 17              |                  | 1971            | 476             |
| CKMT1B   | NR_135750,NR_135748              | MSTRG.10599 | 120.33255<br>22 | 1.889445603      | 0.00013<br>3667 | 0.005047<br>544 |
| NDUFS7   | NM_024407                        | MSTRG.15859 | 1302.4001<br>85 | 0.999808539      | 0.00013<br>3594 | 0.005047<br>544 |
| SNORD136 | NR_132757,NM_014366,NR_003687    | MSTRG.22721 | 1233.0758<br>58 | -<br>0.946681011 | 0.00013<br>3207 | 0.005047<br>544 |
| LRRCC1   | NM_033402                        | MSTRG.31229 | 437.82105<br>46 | -<br>1.338999206 | 0.00013<br>5547 | 0.005107<br>708 |
| YARS     | NM_003680                        | MSTRG.718   | 3088.5531<br>34 | 1.162530972      | 0.00013<br>6729 | 0.005120<br>956 |
| FAM49A   | NM_030797                        | MSTRG.17842 | 802.66266<br>49 | 1.71102396       | 0.00013<br>6458 | 0.005120<br>956 |
| ALKBH3   | NM_139178,NR_026952              | MSTRG.5115  | 352.57956<br>64 | 1.288786998      | 0.00013<br>6762 | 0.005120<br>956 |
| NA       | NA,NM_022782                     | MSTRG.8102  | 524.64825<br>46 | -<br>1.623685669 | 0.00013<br>7344 | 0.005131<br>922 |
| NA       | NA                               | MSTRG.20489 | 20.955400<br>89 | -2.04952715      | 0.00013<br>7869 | 0.005140<br>735 |
| SP3      | NM_003111,NM_001017371           | MSTRG.19334 | 1383.5857<br>85 | -<br>0.770995708 | 0.00014<br>0087 | 0.005212<br>518 |
| LARP6    | NM_001286679,NM_018357,NM_197958 | MSTRG.11052 | 425.30405<br>11 | 0.851581462      | 0.00014<br>1521 | 0.005243<br>949 |
| HAGH     | NM_001040427                     | MSTRG.11689 | 666.27238<br>96 | 1.109187278      | 0.00014<br>1445 | 0.005243<br>949 |
| NA       | NA                               | MSTRG.17470 | 426.47511<br>11 | 1.130078096      | 0.00014<br>2638 | 0.005274<br>346 |
| NAGK     | NM_017567                        | MSTRG.18457 | 441.69251<br>38 | 1.262522999      | 0.00014<br>4096 | 0.005296<br>302 |
| PQLC2    | NM_001040125,NR_109848           | MSTRG.428   | 274.25787<br>13 | 0.995019596      | 0.00014<br>4055 | 0.005296<br>302 |
| BLOC1S4  | NM_018366                        | MSTRG.24156 | 418.87148<br>63 | 0.870592685      | 0.00014<br>4125 | 0.005296<br>302 |
| DAAM1    | NM_001270520,NM_014992           | MSTRG.9520  | 1913.9277<br>08 | -<br>1.347209669 | 0.00014<br>4473 | 0.005298<br>122 |
| RAB32    | NM_006834                        | MSTRG.28548 | 28.860628<br>49 | 1.633643194      | 0.00014<br>7934 | 0.005403<br>984 |
| NA       | NA                               | MSTRG.2387  | 10.878005<br>33 | -<br>2.228926395 | 0.00014<br>7967 | 0.005403<br>984 |
| UBA3     | NM_003968                        | MSTRG.22881 | 1167.1593<br>34 | 0.859560629      | 0.00014<br>9437 | 0.005446<br>471 |
| FAM229A  | NM_001167676,NM_001143888        | MSTRG.710   | 1307.8683<br>39 | -<br>1.151678034 | 0.00015<br>0102 | 0.005448<br>625 |
| SSBP1    | NM_001256511,                    | MSTRG.30245 | 2010.2482       | 1.202865091      | 0.00015         | 0.005448        |



|         |                                                                                |             |                 |                  |                 |                 |
|---------|--------------------------------------------------------------------------------|-------------|-----------------|------------------|-----------------|-----------------|
|         | NM_016943,NM_001256510,NA                                                      |             | 4               |                  | 0108            | 625             |
| RB1CC1  | NM_014781                                                                      | MSTRG.30957 | 1289.0753<br>14 | -<br>1.342353627 | 0.00015<br>0646 | 0.005457<br>012 |
| ZSWIM6  | NM_020928                                                                      | MSTRG.25823 | 1327.6705<br>62 | -<br>0.929702512 | 0.00015<br>2797 | 0.005512<br>459 |
| TST     | NM_003312,NM_001270483                                                         | MSTRG.21743 | 258.93121<br>93 | 1.200525629      | 0.00015<br>271  | 0.005512<br>459 |
| SYT3    | NM_032298,NM_001160328                                                         | MSTRG.17380 | 112.17635<br>39 | 1.989799463      | 0.00015<br>3233 | 0.005516<br>999 |
| RASA3   | NM_001320821,<br>NM_001320822                                                  | MSTRG.8923  | 875.34270<br>81 | -<br>1.032558856 | 0.00015<br>4239 | 0.005533<br>731 |
| PAICS   | NM_006452,NM_001079524                                                         | MSTRG.24481 | 6129.7128<br>22 | -0.68216828      | 0.00015<br>432  | 0.005533<br>731 |
| SCART1  | NR_002934                                                                      | MSTRG.4545  | 18.282036<br>9  | -<br>2.212390241 | 0.00015<br>8249 | 0.005659<br>234 |
| GPALPP1 | NM_018559,NM_001316952,NM_001316951                                            | MSTRG.8528  | 518.32985<br>78 | -<br>1.021720507 | 0.00015<br>8728 | 0.005659<br>234 |
| MCAM    | NM_006500,NR_106814                                                            | MSTRG.6205  | 357.81205<br>51 | -<br>1.579996198 | 0.00015<br>8774 | 0.005659<br>234 |
| PTGES   | NM_004878                                                                      | MSTRG.32854 | 192.11217<br>96 | 1.871971377      | 0.00015<br>9185 | 0.005662<br>525 |
| ZNF737  | NM_001159293,<br>NM_001076675,<br>NM_145297                                    | MSTRG.16603 | 215.87378<br>43 | 1.31245105       | 0.00015<br>9692 | 0.005669<br>217 |
| PIP5KL1 | NM_001135219,<br>NM_173492                                                     | MSTRG.32788 | 44.465067<br>77 | 1.505150579      | 0.00016<br>3113 | 0.005779<br>134 |
| DGAT2   | NM_001253891                                                                   | MSTRG.5748  | 56.639499<br>91 | 1.938405942      | 0.00016<br>5404 | 0.005848<br>662 |
| PHB     | NM_001281496,<br>NM_001281497                                                  | MSTRG.14397 | 2444.2656<br>88 | 1.045341348      | 0.00016<br>6872 | 0.005865<br>585 |
| NSD3    | NM_023034,NM_017778                                                            | MSTRG.30851 | 1906.2039<br>45 | -<br>1.303091429 | 0.00016<br>627  | 0.005865<br>585 |
| MON1A   | NM_032355                                                                      | MSTRG.22633 | 269.59208<br>76 | 1.028820741      | 0.00016<br>6813 | 0.005865<br>585 |
| LIN54   | NM_001115008,<br>NM_001115007                                                  | MSTRG.24668 | 300.24428<br>79 | -<br>1.025360691 | 0.00016<br>819  | 0.005900<br>259 |
| KCNN3   | NM_001204087,<br>NM_170782                                                     | MSTRG.2081  | 261.59408<br>49 | -<br>1.869483534 | 0.00016<br>8927 | 0.005902<br>817 |
| JADE1   | NM_001287437,<br>NM_024900,NM_001287439,NM_001287442,NM_001287441,NM_001287443 | MSTRG.25029 | 600.37881<br>42 | -<br>1.453075876 | 0.00016<br>8767 | 0.005902<br>817 |

|                  |                                                                                       |                     |                 |                  |                 |                 |
|------------------|---------------------------------------------------------------------------------------|---------------------|-----------------|------------------|-----------------|-----------------|
| DNAJC15          | NM_013238                                                                             | MSTRG.8500          | 205.38726<br>98 | 1.986977247      | 0.00017<br>0724 | 0.005942<br>258 |
| NA               | NA                                                                                    | MSTRG.9223          | 14.472980<br>75 | 1.833919303      | 0.00017<br>0528 | 0.005942<br>258 |
| DYRK4            | NR_104115,NA,<br>NM_003845,NM<br>_001282285,NM<br>_005002,NM_01<br>7417,NM_00223<br>5 | MSTRG.6474          | 1767.7412<br>48 | 1.195098179      | 0.00017<br>284  | 0.006004<br>149 |
| DDHD1            | NM_001160148                                                                          | MSTRG.9445          | 15.375373<br>52 | -<br>2.077369974 | 0.00017<br>3329 | 0.006009<br>398 |
| EPHX4            | NM_173567                                                                             | MSTRG.1451          | 49.872793<br>96 | 1.629615826      | 0.00017<br>573  | 0.006080<br>814 |
| CIR1             | NM_004882                                                                             | MSTRG.19344         | 595.30573<br>55 | -<br>1.202245572 | 0.00017<br>7378 | 0.006114<br>034 |
| SLC8A2           | NM_015063                                                                             | MSTRG.17229         | 162.35496<br>05 | 1.893664037      | 0.00017<br>7778 | 0.006115<br>974 |
| TNNI1            | NM_003281                                                                             | MSTRG.2616          | 76.358005<br>34 | 1.771340912      | 0.00018<br>1683 | 0.006178<br>614 |
| ETFA             | NM_001127716,<br>NR_028510                                                            | MSTRG.11186         | 1859.5385<br>94 | 0.917208793      | 0.00018<br>1304 | 0.006178<br>614 |
| RASGRF1          | NM_001145648,<br>NM_153815                                                            | ENSG00000058<br>335 | 27.102691<br>9  | 2.33325939       | 0.00018<br>0522 | 0.006178<br>614 |
| CYP4X1           | NM_178033                                                                             | MSTRG.1032          | 15.691978<br>23 | 2.219789562      | 0.00018<br>1602 | 0.006178<br>614 |
| DHRS4            | NM_001282987,<br>NM_001193636,<br>NM_001193635,<br>NM_198083                          | MSTRG.9125          | 237.14493<br>51 | 1.202780566      | 0.00018<br>0605 | 0.006178<br>614 |
| NA               | NA                                                                                    | MSTRG.17572         | 9.5137995<br>85 | -<br>2.283439274 | 0.00018<br>0954 | 0.006178<br>614 |
| LOC102724<br>532 | NR_135480                                                                             | MSTRG.14338         | 116.87734<br>49 | 1.62098724       | 0.00018<br>2648 | 0.006199<br>571 |
| IPO5             | NM_002271                                                                             | MSTRG.8771          | 8965.5735<br>2  | -<br>1.017333121 | 0.00018<br>4703 | 0.006249<br>414 |
| TMEM117          | NM_001286211                                                                          | MSTRG.6963          | 244.66425<br>4  | 1.431744382      | 0.00018<br>4819 | 0.006249<br>414 |
| CLOCK            | NM_001267843,<br>NM_004898                                                            | MSTRG.24463         | 355.75688<br>4  | -1.31009144      | 0.00018<br>6398 | 0.006279<br>101 |
| PTK2             | NM_001199649,<br>NR_029892                                                            | MSTRG.31645         | 3271.1549<br>98 | -<br>0.793941336 | 0.00018<br>6403 | 0.006279<br>101 |
| NA               | NA                                                                                    | MSTRG.11295         | 91.879734<br>34 | -<br>1.777693396 | 0.00018<br>7011 | 0.006287<br>675 |
| PSMB3            | NM_002795                                                                             | MSTRG.14021         | 2189.1353<br>95 | 1.205362871      | 0.00018<br>8115 | 0.006291<br>867 |

|                  |                                                        |             |                 |                  |                 |                 |
|------------------|--------------------------------------------------------|-------------|-----------------|------------------|-----------------|-----------------|
| C4orf48          | NM_001168243,<br>NM_001141936                          | MSTRG.24096 | 1185.8511<br>19 | 1.762455646      | 0.00018<br>8526 | 0.006291<br>867 |
| NDUFA12          | NM_001258338,<br>NA                                    | MSTRG.7639  | 1583.3778<br>86 | 1.427949945      | 0.00018<br>8866 | 0.006291<br>867 |
| BLOC1S1          | NM_001487,NR<br>_037658,NR_03<br>7657,NM_00119<br>9771 | MSTRG.7240  | 1078.4842<br>35 | 1.46368057       | 0.00018<br>8905 | 0.006291<br>867 |
| MIPEP            | NM_005932                                              | MSTRG.8317  | 319.01549<br>92 | 0.908472889      | 0.00018<br>8163 | 0.006291<br>867 |
| MFSD12           | NM_001287529,<br>NA                                    | MSTRG.15961 | 479.67359<br>4  | 0.77402448       | 0.00019<br>0698 | 0.006336<br>733 |
| LOC389765        | NR_029410                                              | MSTRG.32317 | 131.95007<br>18 | -<br>1.485293394 | 0.00019<br>0964 | 0.006336<br>733 |
| NA               | NA                                                     | MSTRG.8818  | 14.456656<br>89 | 2.065609481      | 0.00019<br>2374 | 0.006371<br>641 |
| COPS9            | NM_138336,NM<br>_001163424                             | MSTRG.20058 | 1027.8417<br>44 | 1.69536433       | 0.00019<br>3113 | 0.006384<br>22  |
| FAAH             | NM_001441                                              | MSTRG.1026  | 63.264216<br>35 | 1.728065685      | 0.00019<br>5195 | 0.006441<br>078 |
| S100B            | NM_006272                                              | MSTRG.21304 | 185.87768<br>32 | 2.178340608      | 0.00019<br>6224 | 0.006463<br>035 |
| CACFD1           | NM_001242370                                           | MSTRG.32933 | 813.39669<br>82 | 1.127906001      | 0.00020<br>0746 | 0.006599<br>747 |
| LOC101927<br>045 | NR_110032                                              | MSTRG.9143  | 29.878875<br>9  | -<br>1.517275701 | 0.00020<br>2907 | 0.006658<br>493 |
| DNPEP            | NM_001319121,<br>NM_001319117,<br>NM_001319118         | MSTRG.19867 | 641.83006<br>98 | 0.968268657      | 0.00020<br>3707 | 0.006672<br>421 |
| VPS26B           | NM_052875                                              | MSTRG.6380  | 1197.1091<br>71 | 0.885677603      | 0.00020<br>4819 | 0.006696<br>539 |
| BTBD8            | NM_183242,NM<br>_015237                                | MSTRG.1452  | 186.71164<br>39 | -<br>1.396362997 | 0.00020<br>5604 | 0.006709<br>845 |
| NA               | NA                                                     | MSTRG.33833 | 60.620461<br>69 | -<br>1.145397542 | 0.00020<br>7109 | 0.006746<br>596 |
| WASF3            | NM_006646                                              | MSTRG.8352  | 2576.1572<br>68 | -<br>1.185367609 | 0.00020<br>7987 | 0.006762<br>799 |
| SMAD2            | NM_005901                                              | MSTRG.15535 | 31.071769<br>73 | 1.51954411       | 0.00020<br>8898 | 0.006775<br>66  |
| NTS              | NM_006183                                              | MSTRG.7577  | 47.152139<br>59 | 2.012168717      | 0.00020<br>9144 | 0.006775<br>66  |
| TXNDC17          | NM_032731                                              | MSTRG.13326 | 701.98245<br>31 | 1.430353338      | 0.00021<br>0292 | 0.006800<br>469 |
| WDSUB1           | NM_001128212,<br>NM_152528,NM<br>_001128213            | MSTRG.19194 | 178.41689<br>05 | 0.699449904      | 0.00021<br>2114 | 0.006822<br>173 |

|         |                                                               |             |                 |                  |                 |                 |
|---------|---------------------------------------------------------------|-------------|-----------------|------------------|-----------------|-----------------|
| MIR7113 | NR_106963,NM_002496,NR_039840                                 | MSTRG.5569  | 1897.0856<br>21 | 0.947615665      | 0.00021<br>1765 | 0.006822<br>173 |
| H2AFZ   | NM_002106                                                     | MSTRG.24782 | 6048.7255<br>26 | 1.384855048      | 0.00021<br>4401 | 0.006870<br>869 |
| MRPS25  | NR_135246,NM_022497                                           | MSTRG.22204 | 617.51700<br>86 | 1.170308204      | 0.00021<br>4351 | 0.006870<br>869 |
| NA      | NA                                                            | MSTRG.27923 | 404.33462<br>67 | 0.773698066      | 0.00021<br>5848 | 0.006904<br>807 |
| WAC     | NM_100264,NM_016628                                           | MSTRG.3466  | 2129.8816<br>86 | -<br>1.035905847 | 0.00021<br>7426 | 0.006932<br>036 |
| SLC17A8 | NM_001145288                                                  | MSTRG.7706  | 44.956229<br>14 | -<br>2.345543795 | 0.00021<br>7479 | 0.006932<br>036 |
| NA      | NA                                                            | MSTRG.8264  | 157.10122<br>51 | 1.072359772      | 0.00022<br>0378 | 0.007011<br>884 |
| SLC35B1 | NM_001278784                                                  | MSTRG.14413 | 993.03809<br>41 | 1.219711661      | 0.00022<br>0885 | 0.007015<br>45  |
| YAE1D1  | NM_020192,NM_001282446                                        | MSTRG.29206 | 242.90035<br>57 | 1.806629662      | 0.00022<br>1416 | 0.007019<br>793 |
| TMEM266 | NM_152335                                                     | MSTRG.11184 | 22.284391<br>37 | 1.564449047      | 0.00022<br>2602 | 0.007044<br>837 |
| TRMT61B | NM_017910                                                     | MSTRG.18005 | 354.61334<br>21 | 1.227536117      | 0.00022<br>3193 | 0.007046<br>775 |
| HIGD1A  | NM_001099668                                                  | MSTRG.22464 | 103.06067<br>24 | 0.929859077      | 0.00022<br>3456 | 0.007046<br>775 |
| CENPC   | NM_001812                                                     | MSTRG.24520 | 415.72355<br>84 | -<br>1.844912875 | 0.00022<br>494  | 0.007068<br>511 |
| CEP44   | NM_001040157,<br>NM_001145314                                 | MSTRG.25313 | 355.40629<br>97 | -<br>1.067705874 | 0.00022<br>4778 | 0.007068<br>511 |
| THUMPD1 | NM_001304550                                                  | MSTRG.12109 | 1158.2638<br>27 | -<br>0.888039916 | 0.00022<br>7693 | 0.007142<br>424 |
| SCO2    | NM_005138,NM_001169110,NM_001169109,NM_001113755,NM_001014440 | MSTRG.22034 | 83.042736<br>48 | 1.648226463      | 0.00022<br>8624 | 0.007159<br>001 |
| NA      | NA,NM_013280                                                  | MSTRG.5373  | 116.34130<br>25 | -<br>1.484309347 | 0.00022<br>939  | 0.007170<br>355 |
| CWF19L2 | NM_152434                                                     | MSTRG.6029  | 389.39895<br>9  | -<br>1.212290838 | 0.00023<br>4029 | 0.007276<br>799 |
| PTPN12  | NM_002835,NM_001131008                                        | MSTRG.29576 | 1594.3765<br>31 | -<br>1.085629864 | 0.00023<br>4432 | 0.007276<br>799 |
| ZC3HC1  | NM_001282190                                                  | MSTRG.30100 | 590.75744<br>56 | 0.857241062      | 0.00023<br>3896 | 0.007276<br>799 |
| CRABP1  | NM_004378                                                     | MSTRG.11221 | 17795.168<br>17 | 1.51829565       | 0.00023<br>3464 | 0.007276<br>799 |

|           |                                                              |             |                 |                  |                 |                 |
|-----------|--------------------------------------------------------------|-------------|-----------------|------------------|-----------------|-----------------|
| MIR6769B  | NR_106919,NM_001193321                                       | MSTRG.2738  | 50.887079<br>46 | 1.758588523      | 0.00023<br>7232 | 0.007350<br>884 |
| PPP1CA    | NM_206873                                                    | MSTRG.5538  | 2216.9427<br>73 | 1.112557976      | 0.00023<br>843  | 0.007375<br>155 |
| NPY       | NM_000905                                                    | MSTRG.29041 | 12.793209<br>71 | -<br>2.168960787 | 0.00023<br>9116 | 0.007383<br>541 |
| PKIB      | NM_001270394,<br>NM_181795,NM_001270395                      | MSTRG.28374 | 597.06661<br>73 | 1.576176321      | 0.00024<br>0039 | 0.007399<br>181 |
| SYNPR     | NM_001130003,<br>NM_144642                                   | MSTRG.22825 | 69.582095<br>81 | 2.049662265      | 0.00024<br>0736 | 0.007407<br>853 |
| KANSL1    | NM_001193466,<br>NM_015443,NM_001193465                      | MSTRG.14294 | 1210.1046<br>3  | -<br>1.184613161 | 0.00024<br>1163 | 0.007408<br>148 |
| ACTR10    | NM_018477                                                    | MSTRG.9504  | 1438.8659<br>08 | 1.0053955        | 0.00024<br>2266 | 0.007425<br>006 |
| SEC24B    | NM_001042734                                                 | MSTRG.24874 | 1085.7488<br>73 | -<br>1.082816822 | 0.00024<br>2546 | 0.007425<br>006 |
| MPHOSPH10 | NM_005791                                                    | MSTRG.18444 | 750.81307<br>92 | -1.26237018      | 0.00024<br>3593 | 0.007444<br>239 |
| ANAPC11   | NM_001289414,<br>NM_001002249,<br>NM_001002244,<br>NM_148896 | MSTRG.15043 | 1337.5870<br>51 | 1.299175573      | 0.00024<br>4229 | 0.007450<br>857 |
| ZSCAN23   | NM_001012455,<br>NA                                          | MSTRG.27412 | 553.16576<br>43 | -<br>1.255108613 | 0.00024<br>5214 | 0.007468<br>097 |
| UFD1L     | NM_005659                                                    | MSTRG.21389 | 1091.1003<br>19 | 1.254655544      | 0.00024<br>6438 | 0.007479<br>761 |
| LY6H      | NM_002347,NM_001135655,NM_001130478                          | MSTRG.31641 | 477.32690<br>86 | 1.992676648      | 0.00024<br>6259 | 0.007479<br>761 |
| RNASEH2A  | NM_006397                                                    | MSTRG.16312 | 1122.0495<br>27 | 1.087042689      | 0.00024<br>6873 | 0.007480<br>22  |
| RNF44     | NM_014901                                                    | MSTRG.26984 | 1291.7710<br>87 | -<br>1.230497043 | 0.00024<br>9331 | 0.007541<br>843 |
| RBM39     | NM_001242599,<br>NR_136587                                   | MSTRG.20546 | 3589.9978<br>38 | -<br>0.802818208 | 0.00025<br>1942 | 0.007601<br>976 |
| NETO1     | NM_001201465,<br>NM_138966,NM_138999,NA                      | MSTRG.15712 | 73.517014<br>02 | -<br>1.629297908 | 0.00025<br>2174 | 0.007601<br>976 |
| NA        | NA                                                           | MSTRG.16201 | 108.45238<br>92 | 1.422016224      | 0.00025<br>4982 | 0.007666<br>861 |
| ARFGEF1   | NM_006421                                                    | MSTRG.31100 | 1053.1023<br>89 | -<br>0.937117231 | 0.00025<br>5188 | 0.007666<br>861 |
| SETD6     | NM_001160305                                                 | MSTRG.12600 | 123.54622<br>88 | -<br>1.933217943 | 0.00025<br>6312 | 0.007687<br>626 |

|                  |                                             |                     |                 |                  |                 |                 |
|------------------|---------------------------------------------|---------------------|-----------------|------------------|-----------------|-----------------|
| ZNF71            | NM_021216                                   | MSTRG.17612         | 193.03604<br>43 | 2.204033657      | 0.00025<br>8229 | 0.007732<br>089 |
| TIAM1            | NM_003253                                   | MSTRG.21058         | 804.12636<br>81 | -<br>1.467944737 | 0.00026<br>2082 | 0.007834<br>263 |
| MOSPD3           | NM_001040097,<br>NM_001040098,<br>NM_023948 | MSTRG.29789         | 410.73202<br>86 | 0.820816761      | 0.00026<br>4114 | 0.007881<br>775 |
| GLRX2            | NM_197962,NM<br>_016066                     | MSTRG.2557          | 83.007472<br>43 | 1.644021808      | 0.00026<br>5067 | 0.007896<br>957 |
| LRP3             | NM_002333                                   | MSTRG.16740         | 1340.8852<br>44 | 0.976005666      | 0.00026<br>8741 | 0.007968<br>376 |
| LOC102723<br>360 | NM_001322975                                | MSTRG.20908         | 88.358156<br>16 | 2.175321906      | 0.00026<br>8808 | 0.007968<br>376 |
| NA               | NA                                          | MSTRG.16697         | 79.323259<br>95 | -<br>1.683561632 | 0.00026<br>8334 | 0.007968<br>376 |
| CREBZF           | NR_028024                                   | MSTRG.5862          | 601.95799<br>44 | -<br>1.583606648 | 0.00026<br>9872 | 0.007986<br>601 |
| CLK1             | NM_004071,NM<br>_001162407                  | MSTRG.19601         | 1037.8655<br>39 | -<br>1.482429074 | 0.00027<br>1895 | 0.008033<br>102 |
| ARMT1            | NM_001286562                                | MSTRG.28638         | 770.96621<br>34 | 0.70563897       | 0.00027<br>2663 | 0.008042<br>416 |
| ELOB             | NM_007108                                   | MSTRG.11781         | 2931.7056<br>75 | 1.335527962      | 0.00027<br>3554 | 0.008055<br>35  |
| UBL7             | NM_001286739                                | MSTRG.11118         | 1051.4189<br>18 | 0.891291992      | 0.00027<br>5528 | 0.008100<br>067 |
| ZNF626           | NM_001076675                                | MSTRG.16609         | 48.734615<br>32 | 1.626091918      | 0.00027<br>8312 | 0.008168<br>397 |
| AGAP12P          | NR_029396                                   | ENSG00000265<br>018 | 24.021043<br>81 | -1.85955519      | 0.00028<br>0124 | 0.008199<br>649 |
| ITPA             | NR_052000,NM<br>_001267623,NM<br>_001324240 | MSTRG.20164         | 594.46163<br>41 | 0.93793675       | 0.00028<br>0298 | 0.008199<br>649 |
| SLC22A5          | NM_001308122                                | MSTRG.26438         | 58.112845<br>32 | 1.391692481      | 0.00028<br>1317 | 0.008215<br>948 |
| SOD1             | NM_000454                                   | MSTRG.21061         | 3576.4342<br>17 | 1.396224408      | 0.00028<br>241  | 0.008231<br>264 |
| PTCH2            | NM_001166292,<br>NM_003738                  | MSTRG.979           | 56.539051<br>71 | -<br>2.106173813 | 0.00028<br>2767 | 0.008231<br>264 |
| IL17D            | NM_138284                                   | MSTRG.8265          | 136.10668<br>26 | 1.088850646      | 0.00028<br>349  | 0.008238<br>824 |
| INF2             | NM_022489,NM<br>_032714                     | MSTRG.10127         | 586.32998<br>87 | -<br>1.433791095 | 0.00028<br>4182 | 0.008245<br>46  |
| CAPN1            | NM_001198868,<br>NM_001198869,<br>NR_040008 | MSTRG.5432          | 1351.4102<br>08 | 0.992379714      | 0.00028<br>588  | 0.008267<br>75  |

|          |                                                              |                     |                 |                  |                 |                 |
|----------|--------------------------------------------------------------|---------------------|-----------------|------------------|-----------------|-----------------|
| RPS18P9  | NR_077247                                                    | MSTRG.28580         | 17.683693<br>45 | -<br>1.938848196 | 0.00028<br>5443 | 0.008267<br>75  |
| CDC14A   | NM_001319211,<br>NM_033313,NM<br>_001319212,NM<br>_001319210 | MSTRG.1547          | 219.24594<br>24 | -<br>1.341731653 | 0.00028<br>9838 | 0.008368<br>616 |
| DNAJC21  | NM_001012339                                                 | MSTRG.25628         | 601.79393<br>12 | -<br>1.230354624 | 0.00029<br>1425 | 0.008400<br>782 |
| NANS     | NM_018946                                                    | MSTRG.32487         | 423.48871<br>52 | -<br>1.433049992 | 0.00029<br>3304 | 0.008441<br>263 |
| RSBN1L   | NM_198467                                                    | MSTRG.29578         | 476.99122<br>6  | -<br>0.796417599 | 0.00029<br>5275 | 0.008463<br>386 |
| PHF3     | NM_001290259,<br>NM_001290260,<br>NM_015153,NA               | MSTRG.27934         | 1213.9820<br>41 | -<br>1.640277874 | 0.00029<br>55   | 0.008463<br>386 |
| CYB5R4   | NM_016230                                                    | MSTRG.28068         | 388.44818<br>48 | -<br>1.078196642 | 0.00029<br>4998 | 0.008463<br>386 |
| NEU3     | NM_006656                                                    | MSTRG.5716          | 214.50454<br>56 | -<br>2.019579508 | 0.00029<br>6609 | 0.008481<br>485 |
| EIF5AL1  | NM_001099692                                                 | MSTRG.3967          | 701.11048<br>91 | -<br>1.070120715 | 0.00029<br>8331 | 0.008503<br>396 |
| DIRC2    | NM_032839                                                    | MSTRG.23206         | 435.30867<br>7  | -<br>1.088227007 | 0.00029<br>8158 | 0.008503<br>396 |
| CMKLR1   | NM_001142345,<br>NM_004072                                   | ENSG00000174<br>600 | 16.541002<br>11 | -<br>2.311537742 | 0.00030<br>2643 | 0.008612<br>507 |
| ZNF184   | NM_001318893,<br>NM_001318892                                | MSTRG.27374         | 188.77167<br>19 | -<br>1.834356508 | 0.00030<br>3552 | 0.008624<br>548 |
| NPL      | NM_001200051                                                 | MSTRG.2498          | 49.339820<br>08 | -<br>1.417897732 | 0.00030<br>8981 | 0.008764<br>801 |
| BEX1     | NM_018476                                                    | MSTRG.33891         | 2537.0331<br>01 | -<br>1.390053421 | 0.00030<br>9864 | 0.008775<br>856 |
| POMP     | NM_015932                                                    | MSTRG.8381          | 2766.2664<br>45 | -<br>1.405593114 | 0.00031<br>0598 | 0.008782<br>651 |
| JAG2     | NM_145159,NR<br>_106823,NM_17<br>7533,NM_00131<br>8380       | MSTRG.10154         | 595.85039<br>08 | -<br>1.281928505 | 0.00031<br>1137 | 0.008783<br>937 |
| ATP6V0D1 | NM_004691                                                    | MSTRG.12663         | 2241.6554<br>29 | -<br>1.50085125  | 0.00031<br>7339 | 0.008874<br>42  |
| PTPN5    | NM_001039970,<br>NM_001278236                                | MSTRG.4928          | 199.83101<br>69 | -<br>1.6849094   | 0.00031<br>7026 | 0.008874<br>42  |
| SSNA1    | NM_003731                                                    | MSTRG.33015         | 833.53260<br>49 | -<br>1.171788732 | 0.00031<br>5788 | 0.008874<br>42  |
| SLC6A17  | NM_001010898                                                 | MSTRG.1619          | 68.807165<br>67 | -<br>2.219805541 | 0.00031<br>7835 | 0.008874<br>42  |
| DYRK3    | NM_001004023                                                 | MSTRG.2749          | 130.58920       | 2.20843419       | 0.00031         | 0.008874        |

|              |                                             |             |                 |                  |                 |                 |
|--------------|---------------------------------------------|-------------|-----------------|------------------|-----------------|-----------------|
|              |                                             |             | 48              |                  | 6497            | 42              |
| USMG5        | NM_001206426,<br>NR_031707                  | MSTRG.4290  | 2395.6288<br>37 | 1.365881939      | 0.00031<br>7035 | 0.008874<br>42  |
| CYB5R1       | NM_016243                                   | MSTRG.2665  | 568.53551<br>31 | 1.716375415      | 0.00031<br>5098 | 0.008874<br>42  |
| TOGARAM<br>1 | NR_131765                                   | MSTRG.9344  | 384.79383<br>46 | -<br>1.310479313 | 0.00031<br>9872 | 0.008917<br>308 |
| NA           | NA                                          | MSTRG.16516 | 47.521754<br>78 | -<br>1.683401357 | 0.00032<br>11   | 0.008923<br>417 |
| VCP          | NM_007126                                   | MSTRG.32037 | 7722.3358<br>07 | 0.69615945       | 0.00032<br>0811 | 0.008923<br>417 |
| LARP7        | NM_001267039,<br>NM_015454                  | MSTRG.24908 | 868.13552<br>43 | -<br>1.109909784 | 0.00032<br>1596 | 0.008923<br>417 |
| ANKMY1       | NM_001282771,<br>NM_001308375               | MSTRG.20064 | 70.884686<br>48 | -<br>1.307002299 | 0.00032<br>365  | 0.008966<br>417 |
| GSTZ1        | NM_001312660                                | MSTRG.9801  | 461.54545<br>15 | 1.236446266      | 0.00032<br>7754 | 0.009066        |
| TBCB         | NM_001281,NM<br>_001300971                  | MSTRG.16827 | 2521.0995<br>55 | 1.117283436      | 0.00032<br>8911 | 0.009083<br>873 |
| ADCYAP1      | NM_001099733,<br>NM_001117                  | MSTRG.15129 | 19.018365<br>07 | 1.652030152      | 0.00033<br>0777 | 0.009121<br>235 |
| XPO1         | NM_003400                                   | MSTRG.18328 | 6485.3721<br>34 | -<br>1.139190714 | 0.00033<br>4544 | 0.009210<br>843 |
| NA           | NA,NM_018713                                | MSTRG.2862  | 69.401865       | 1.853286677      | 0.00033<br>9217 | 0.009302<br>402 |
| TCFL5        | NM_006602,NM<br>_001301726                  | MSTRG.20826 | 416.39472<br>75 | -<br>0.955642434 | 0.00033<br>9439 | 0.009302<br>402 |
| B2M          | NM_004048                                   | MSTRG.10624 | 2762.8809<br>59 | 1.695881195      | 0.00034<br>5272 | 0.009447<br>707 |
| PCF11        | NM_001346415                                | MSTRG.5834  | 851.91194<br>7  | -<br>1.099222955 | 0.00034<br>6941 | 0.009478<br>793 |
| BAZ2B        | NM_001289975,<br>NM_001329858,<br>NR_110586 | MSTRG.19206 | 1017.7050<br>89 | -<br>1.530864707 | 0.00034<br>9485 | 0.009533<br>652 |
| FIG4         | NM_014845                                   | MSTRG.28257 | 914.67611<br>07 | 0.854772899      | 0.00035<br>2102 | 0.009546<br>472 |
| CCDC186      | NM_018017,NM<br>_153249,NR_03<br>1747       | MSTRG.4365  | 283.66154<br>55 | -<br>1.371456069 | 0.00035<br>0527 | 0.009546<br>472 |
| RITA1        | NM_001286215                                | MSTRG.7919  | 352.94250<br>79 | 1.170867689      | 0.00035<br>1348 | 0.009546<br>472 |
| UQCC2        | NM_032340                                   | MSTRG.27637 | 1108.7934<br>65 | 1.123557033      | 0.00035<br>2091 | 0.009546<br>472 |
| LINC00698    | NR_027104,NA                                | MSTRG.22822 | 20.016908<br>5  | 2.198700053      | 0.00035<br>3327 | 0.009565<br>098 |
| COQ8A        | NM_020247,NA                                | MSTRG.2949  | 432.80607       | -1.34230984      | 0.00035         | 0.009625        |



|         |                                                |             |             |             |             |             |
|---------|------------------------------------------------|-------------|-------------|-------------|-------------|-------------|
|         |                                                |             | 34          |             | 6104        | 632         |
| ASAH1   | NM_177924,NM_001127505                         | MSTRG.30626 | 2545.529107 | 1.483146167 | 0.000356854 | 0.009631254 |
| MTF1    | NM_005955                                      | MSTRG.816   | 312.0390104 | 1.323180005 | 0.00035908  | 0.009676663 |
| ZNF254  | NM_001278661,<br>NM_001278662,<br>NM_001278665 | MSTRG.16678 | 842.8822231 | 0.802094432 | 0.000360454 | 0.009688017 |
| SYNE4   | NM_001039876,<br>NM_001297701,<br>NM_198867    | MSTRG.16818 | 214.650589  | 0.929827232 | 0.000360591 | 0.009688017 |
| ECHS1   | NM_004092                                      | MSTRG.4535  | 2510.838928 | 1.135032821 | 0.000361257 | 0.009691275 |
| METRNL  | NM_024042                                      | MSTRG.11636 | 1124.281262 | 1.228378487 | 0.000362748 | 0.009716624 |
| MFSD13A | NM_024789                                      | MSTRG.4252  | 128.4662251 | 0.959614167 | 0.000364996 | 0.009762129 |
| NA      | NA,NM_003348                                   | MSTRG.7625  | 3110.638729 | 1.068250825 | 0.000365591 | 0.009763366 |
| POLR2L  | NM_021128                                      | MSTRG.4611  | 1321.539287 | 1.244998179 | 0.000367581 | 0.009771787 |
| TTC3P1  | NR_030737                                      | MSTRG.33758 | 328.0164701 | 1.412586405 | 0.000368653 | 0.009771787 |
| NA      | NA                                             | MSTRG.34398 | 30.07158652 | 1.643586129 | 0.000368108 | 0.009771787 |
| PMS2CL  | NR_002217,NA                                   | MSTRG.28915 | 418.6632889 | 1.271689827 | 0.00036844  | 0.009771787 |
| NOTCH1  | NM_017617                                      | MSTRG.32974 | 3110.073577 | 1.616506607 | 0.000366921 | 0.009771787 |
| GLRX3   | NM_001321980,<br>NM_001199868                  | MSTRG.4512  | 2249.569495 | 0.960348962 | 0.000369229 | 0.009772476 |
| NA      | NA                                             | MSTRG.14161 | 8.364530674 | 2.036294414 | 0.00037279  | 0.009850364 |
| WEE1    | NM_003390,NM_001143976                         | MSTRG.4808  | 694.9843542 | 1.141986927 | 0.000373279 | 0.009850364 |
| MTERF2  | NM_025198                                      | MSTRG.7799  | 251.375979  | 1.31580186  | 0.000376072 | 0.009909354 |
